# Supplementary material for: Shigella sonnei infection of zebrafish reveals that O-antigen mediates neutrophil tolerance and dysentery incidence
Source: PLoS Pathog. 2019 Dec 12;15(12):e1008006. doi: 10.1371/journal.ppat.1008006 (PMC6980646; doi:10.1371/journal.ppat.1008006)
Supplement: S1 Table — (XLSX) [file ppat.1008006.s007.xlsx]

## Sheet: DESeq2 S. sonnei
GeneID	Name	Description	Log2FoldChange	-Log10padj	pvalue	padj
SSON53G_RS09465	gadB_1	glutamate decarboxylase beta	8.15463	NA	0	0
SSON53G_RS21005	gadB_2	glutamate decarboxylase alpha	7.77815	NA	0	0
SSON53G_RS09470	gadC	glutamate:gamma-aminobutyrate antiporter	7.34194	NA	0	0
SSON53G_RS05440	SSON53G_RS05440 (ymdF-like)	KGG family protein	6.90013	NA	0	0
SSON53G_RS25540	argI	ornithine carbamoyltransferase	6.49314	NA	0	0
SSON53G_RS04610	artJ	arginine ABC transporter substrate-binding protein	5.8872	292.156	1.46986e-295	6.98551e-293
SSON53G_RS24140	aceB_1	malate synthase A	5.71985	NA	0	0
SSON53G_RS24150	aceA	isocitrate lyase	5.52313	NA	0	0
SSON53G_RS20965	hdeA	acid stress chaperone HdeA	5.26665	NA	0	0
SSON53G_RS18685	ygjG	putrescine aminotransferase	5.23097	NA	0	0
SSON53G_RS01400	yafH	acyl-CoA dehydrogenase	5.17197	NA	0	0
SSON53G_RS05540	phoH	phosphate starvation-inducible protein PhoH	3.74665	NA	0	0
SSON53G_RS02350	ybaA	DUF1428 domain-containing protein	4.83391	240.75	4.05265e-244	1.77787e-241
SSON53G_RS20960	hdeB	acid stress chaperone HdeB	5.34401	238.92	2.95068e-242	1.20198e-239
SSON53G_RS17725	gcvP	glycine dehydrogenase	-4.03184	236.641	6.01557e-240	2.28712e-237
SSON53G_RS24100	purD	phosphoribosylamine--glycine ligase	-4.70644	233.901	3.5252e-237	1.25651e-234
SSON53G_RS20815	SSON53G_RS20815 (yhiM-like)	Inner membrane protein YhiM	4.83716	227.33	1.3943e-230	4.67748e-228
SSON53G_RS25460	SSON53G_RS25460 (treB-like)	PTS trehalose transporter subunit IIBC	-5.61876	221.311	1.54213e-224	4.88597e-222
SSON53G_RS23015	fadB	fatty acid oxidation complex subunit alpha FadB	5.17627	218.14	2.41275e-221	7.24206e-219
SSON53G_RS12405	yegP	DUF1508 domain-containing protein	4.87139	215.134	2.57762e-218	7.35008e-216
SSON53G_RS11390	adhE_3	bifunctional acetaldehyde-CoA/alcohol dehydrogenase	-2.31271	214.188	2.38621e-217	6.48026e-215
SSON53G_RS17730	gcvH	glycine cleavage system protein H	-4.78648	211.69	7.86891e-215	2.03984e-212
SSON53G_RS15160	glyA	serine hydroxymethyltransferase	-2.64258	206.696	8.11581e-210	2.01237e-207
SSON53G_RS20970	hdeD	protein HdeD	4.56998	206.185	2.74959e-209	6.53372e-207
SSON53G_RS07980	katE	catalase HPII	3.80187	205.8	6.94613e-209	1.58455e-206
SSON53G_RS15190	purL	phosphoribosylformylglycinamidine synthase	-3.4357	201.581	1.1964e-204	2.62427e-202
SSON53G_RS23010	fadA	acetyl-CoA C-acyltransferase FadA	4.93908	195.47	1.60583e-198	3.39187e-196
SSON53G_RS24380	yjbJ	stress-induced protein	3.28321	193.507	1.52771e-196	3.11162e-194
SSON53G_RS09600	narZ	nitrate reductase subunit alpha	4.39835	192.633	1.18366e-195	2.32773e-193
SSON53G_RS20945	SSON53G_RS20945 (slp-like)	outer membrane protein slp	3.42626	181.764	9.05744e-185	1.72182e-182
SSON53G_RS17735	gcvT	aminomethyltransferase	-3.71791	180.576	1.44187e-183	2.65257e-181
SSON53G_RS17290	argA	amino-acid N-acetyltransferase	3.65044	180.289	2.88741e-183	5.14591e-181
SSON53G_RS03790	modA	molybdate ABC transporter substrate-binding protein	3.71713	178.189	3.74245e-181	6.46763e-179
SSON53G_RS31575	SSON53G_RS31575 (mcbA-like)	DUF1471 domain-containing protein	4.37424	177.24	3.42815e-180	5.75022e-178
SSON53G_RS02515	ybaT	amino acid permease	4.12301	174.813	9.43972e-178	1.53813e-175
SSON53G_RS02230	SSON53G_RS02230 (bolA-like)	protein BolA	2.51953	168.289	3.24161e-171	5.13526e-169
SSON53G_RS03795	modB	molybdenum ABC transporter permease	3.17936	163.499	2.05694e-166	3.17046e-164
SSON53G_RS15065	suhB	inositol-1-monophosphatase	2.40468	160.094	5.36813e-163	8.05644e-161
SSON53G_RS09595	SSON53G_RS9595 (narU-like)	NarK family nitrate/nitrite MFS transporter	5.51681	159.289	3.51217e-162	5.13588e-160
SSON53G_RS15890	trxC	thiol disulfide reductase thioredoxin	3.45782	158.187	4.559e-161	6.5e-159
SSON53G_RS23865	argC	N-acetyl-gamma-glutamyl-phosphate reductase	4.07493	157.845	1.0275e-160	1.42923e-158
SSON53G_RS25885	yjiY	carbon starvation protein A	-4.47881	156.468	2.50636e-159	3.40328e-157
SSON53G_RS12720	yohC	YIP1 family protein	4.85123	156.289	3.8726e-159	5.13615e-157
SSON53G_RS25455	treC	alpha,alpha-phosphotrehalase	-6.95613	151.298	3.88867e-154	5.04024e-152
SSON53G_RS06310	ycgB	SpoVR family protein	2.89187	150.843	1.13279e-153	1.43562e-151
SSON53G_RS13695	purF	amidophosphoribosyltransferase	-3.19014	149.02	7.7013e-152	9.54793e-150
SSON53G_RS05145	rmf	ribosome modulation factor	4.23914	148.666	1.7789e-151	2.15852e-149
SSON53G_RS06315	dadA	D-amino acid dehydrogenase small subunit	3.3912	139.918	1.01603e-142	1.20717e-140
SSON53G_RS20975	gadE	transcriptional regulator GadE	4.97504	138.21	5.30344e-141	6.17255e-139
SSON53G_RS06530	otsA	trehalose-6-phosphate synthase	2.91521	136.679	1.83738e-139	2.09572e-137
SSON53G_RS13460	elaB	protein ElaB	2.7462	136.678	1.87847e-139	2.10057e-137
SSON53G_RS17185	sdaB	L-serine ammonia-lyase	-3.71273	136.597	2.30476e-139	2.5277e-137
SSON53G_RS12790	mglA	galactose/methyl galactoside ABC transporter ATP-binding protein MglA	3.32797	135.219	5.61494e-138	6.04189e-136
SSON53G_RS08405	ppsA	phosphoenolpyruvate synthase	2.23072	134.549	2.67705e-137	2.82726e-135
SSON53G_RS05520	ycdN	ferrous iron permease EfeU	4.00439	134.35	4.30987e-137	4.46894e-135
SSON53G_RS24105	purH	bifunctional phosphoribosylaminoimidazolecarboxamide formyltransferase/inosine monophosphate cyclohydrolase	-3.54773	133.275	5.21091e-136	5.30675e-134
SSON53G_RS29190	yncL	stress response membrane protein YncL	4.78358	129.734	1.8443e-132	1.84527e-130
SSON53G_RS20350	feoB	Fe(2+) transporter permease subunit FeoB	-3.52115	128.458	3.5409e-131	3.48168e-129
SSON53G_RS14265	yfdV	transporter	6.08055	126.509	3.208e-129	3.10089e-127
SSON53G_RS05435	hypothetical protein	hypothetical protein	5.58019	126.495	3.36567e-129	3.19907e-127
SSON53G_RS04580	hypothetical protein	spermidine/putrescine ABC transporter substrate-binding protein PotF	3.75072	126.285	5.5502e-129	5.18898e-127
SSON53G_RS25005	hypothetical protein	entericidin B	3.18599	124.705	2.14187e-127	1.97017e-125
SSON53G_RS09825	potF	spermidine/putrescine ABC transporter substrate-binding protein	3.75205	119.332	5.14573e-122	4.65811e-120
SSON53G_RS07895	astA	arginine N-succinyltransferase	3.3053	118.784	1.84327e-121	1.64253e-119
SSON53G_RS20100	argD	aspartate aminotransferase family protein	3.35949	118.118	8.68401e-121	7.61922e-119
SSON53G_RS30345	hypothetical protein	hypothetical protein	4.72842	117.811	1.78871e-120	1.5456e-118
SSON53G_RS00070	hypothetical protein	molecular chaperone DnaK	2.21964	117.372	4.98529e-120	4.24345e-118
SSON53G_RS22080	hypothetical protein	periplasmic dipeptide transporter	3.03528	117.14	8.64375e-120	7.24931e-118
SSON53G_RS01955	yaiA	protein YaiA	2.23961	116.892	1.55314e-119	1.2837e-117
SSON53G_RS20445	glpD	glycerol-3-phosphate dehydrogenase	2.44807	115.276	6.50709e-118	5.30142e-116
SSON53G_RS09520	osmC	OsmC family peroxiredoxin	2.26205	114.185	8.13963e-117	6.53807e-115
SSON53G_RS02305	cof	HMP-PP phosphatase	1.9296	112.377	5.29685e-115	4.19554e-113
SSON53G_RS09110	ygiW_2	TIGR00156 family protein	4.3142	111.6	3.21444e-114	2.51122e-112
SSON53G_RS03800	modC	molybdenum import ATP-binding protein ModC	3.09715	110.133	9.54705e-113	7.35768e-111
SSON53G_RS09820	potA_2	ABC transporter ATP-binding protein	3.74125	108.639	3.02032e-111	2.29665e-109
SSON53G_RS07890	astC	succinylornithine aminotransferase	3.48613	107.225	7.94405e-110	5.96118e-108
SSON53G_RS08630	cfa	cyclopropane-fatty-acyl-phospholipid synthase	2.62881	106.932	1.57809e-109	1.16881e-107
SSON53G_RS06525	otsB	trehalose-6-phosphate phosphatase	3.32152	106.737	2.50791e-109	1.83367e-107
SSON53G_RS12740	hypothetical protein	hypothetical protein	4.17853	106.345	6.25796e-109	4.51761e-107
SSON53G_RS02885	hypothetical protein	isochorismate synthase EntC	4.20193	106.112	1.08392e-108	7.72697e-107
SSON53G_RS04335	hypothetical protein	DNA starvation/stationary phase protection protein	2.6448	104.955	1.57453e-107	1.10859e-105
SSON53G_RS04825	ycaD	MFS transporter	2.86013	104.756	2.51959e-107	1.75234e-105
SSON53G_RS26030	fhuF	hydroxamate siderophore iron reductase FhuF	4.63285	104.697	2.92312e-107	2.0085e-105
SSON53G_RS23615	tpiA	triose-phosphate isomerase	-2.05077	103.56	4.05955e-106	2.75615e-104
SSON53G_RS07900		succinylglutamate-semialdehyde dehydrogenase	3.1627	102.751	2.64207e-105	1.77267e-103
SSON53G_RS09530	rpsV	stationary-phase-induced ribosome-associated protein	2.78601	101.383	6.24126e-104	4.13882e-102
SSON53G_RS04550	grxA	glutaredoxin	3.65814	99.8669	2.07284e-102	1.35878e-100
SSON53G_RS09605	narY	nitrate reductase subunit beta	4.8773	99.6799	3.22494e-102	2.08998e-100
SSON53G_RS17855	epd	D-erythrose-4-phosphate dehydrogenase	-2.59233	98.2937	7.93541e-101	5.0849e-99
SSON53G_RS31685	hypothetical protein	hypothetical protein	4.26969	97.1919	1.01439e-99	6.42785e-98
SSON53G_RS03730	hypothetical protein	hypothetical protein	2.81698	95.5402	4.59937e-98	2.88244e-96
SSON53G_RS22455	hypothetical protein	ribose import ATP-binding protein RbsA	-3.95783	95.349	7.22232e-98	4.47705e-96
SSON53G_RS24695		VOC family protein	4.31483	95.2502	9.16548e-98	5.62051e-96
SSON53G_RS21210	ibpB	heat-shock protein IbpB	3.66035	95.1396	1.19523e-97	7.2515e-96
SSON53G_RS15945	clpB	chaperone protein ClpB	2.33676	94.7409	3.02471e-97	1.81578e-95
SSON53G_RS12905	fruB	bifunctional PTS fructose transporter subunit IIA/HPr protein	-4.22312	94.6399	3.85744e-97	2.29156e-95
SSON53G_RS31795		transposase	2.6123	93.9239	2.02675e-96	1.1916e-94
SSON53G_RS26085	ytjA	DUF1328 domain-containing protein	2.35868	93.8657	2.34095e-96	1.36229e-94
SSON53G_RS23045		tRNA-Ile	2.00251	93.6271	4.09633e-96	2.35973e-94
SSON53G_RS01965	aroM	hypothetical protein	3.06132	93.458	6.1084e-96	3.48362e-94
SSON53G_RS25040	frdA	fumarate reductase flavoprotein subunit	-3.09952	91.3244	8.3907e-94	4.73784e-92
SSON53G_RS09615	narV	respiratory nitrate reductase subunit gamma	4.09216	91.2603	9.82257e-94	5.49197e-92
SSON53G_RS02900	entA	2,3-dihydro-2,3-dihydroxybenzoate dehydrogenase	3.64091	91.2551	1.0038e-93	5.55793e-92
SSON53G_RS24955	aspA	aspartate ammonia-lyase	-2.50066	89.9547	2.02408e-92	1.10994e-90
SSON53G_RS25155	purA	adenylosuccinate synthetase	-1.49993	89.68	3.84635e-92	2.08912e-90
SSON53G_RS15055	iscR	Fe-S cluster assembly transcriptional regulator IscR	2.23876	88.8469	2.64446e-91	1.42277e-89
SSON53G_RS24950	dcuA	anaerobic C4-dicarboxylate transporter DcuA	-2.05831	88.6973	3.76669e-91	2.00761e-89
SSON53G_RS06320	dadX	alanine racemase	3.22695	87.926	2.24557e-90	1.18579e-88
SSON53G_RS01185	mltD	lytic transglycosylase	2.38403	86.2328	1.11812e-88	5.85012e-87
SSON53G_RS20010	dsrH	sulfurtransferase TusB	2.60881	86.1967	1.22633e-88	6.35795e-87
SSON53G_RS12795	mglB	galactose ABC transporter substrate-binding protein	3.85748	85.7205	3.70425e-88	1.90318e-86
SSON53G_RS19670		amino acid ABC transporter substrate-binding protein	3.12371	85.3665	8.44435e-88	4.29983e-86
SSON53G_RS11785		DUF2525 domain-containing protein	2.87671	84.7582	3.45732e-87	1.74488e-85
SSON53G_RS24515		acetate--CoA ligase	3.93583	83.6712	4.26235e-86	2.1323e-84
SSON53G_RS10465	ydaM	sensor domain-containing diguanylate cyclase	2.37219	83.4021	7.98991e-86	3.9623e-84
SSON53G_RS24510	hypothetical protein	hypothetical protein	4.18893	83.2385	1.17448e-85	5.77418e-84
SSON53G_RS23785	katG	catalase-peroxidase	2.49963	82.9671	2.21323e-85	1.07881e-83
SSON53G_RS09950	ydcI	LysR family transcriptional regulator	2.49819	82.4025	8.18964e-85	3.95809e-83
SSON53G_RS19185	argG	argininosuccinate synthase	2.52685	82.0127	2.02654e-84	9.71205e-83
SSON53G_RS03555		succinate dehydrogenase cytochrome b556 subunit	1.80845	81.8558	2.93302e-84	1.39392e-82
SSON53G_RS07905	astB	succinylarginine dihydrolase	3.14003	81.7524	3.75243e-84	1.7686e-82
SSON53G_RS12465	fbaB	fructose-bisphosphate aldolase	3.32432	81.5638	5.84057e-84	2.73023e-82
SSON53G_RS10115	sitA	metal ABC transporter substrate-binding protein	5.48154	81.4759	7.21017e-84	3.34306e-82
SSON53G_RS22265	glmS	glutamine--fructose-6-phosphate transaminase (isomerizing)	-2.1264	80.6915	4.42374e-83	2.03456e-81
SSON53G_RS07255	manZ	PTS mannose transporter subunit IID	-1.54208	79.8079	3.41108e-82	1.55627e-80
SSON53G_RS21790	gpmM	2,3-bisphosphoglycerate-independent phosphoglycerate mutase	-2.55275	79.6811	4.60462e-82	2.08414e-80
SSON53G_RS20950	dctR	helix-turn-helix transcriptional regulator	3.67751	79.6446	5.04784e-82	2.26676e-80
SSON53G_RS22090	dppB	peptide ABC transporter permease	3.61317	78.8571	3.11893e-81	1.38963e-79
SSON53G_RS20720	dcrB	protein DcrB	-2.30627	77.3779	9.47542e-80	4.18902e-78
SSON53G_RS02875	entS	MFS transporter	2.81998	77.0029	2.26452e-79	9.93428e-78
SSON53G_RS04735	cspD	cold-shock protein CspD	2.95719	76.7225	4.35177e-79	1.89451e-77
SSON53G_RS28535	hypothetical protein	hypothetical protein	2.95655	76.3649	9.99079e-79	4.31648e-77
SSON53G_RS23855	ppc	phosphoenolpyruvate carboxylase	-1.88849	75.0528	2.06532e-77	8.85602e-76
SSON53G_RS24145	aceB_1	hypothetical protein	6.69096	74.8266	3.50242e-77	1.49062e-75
SSON53G_RS14690	tktB	transketolase	3.05865	74.5708	6.3589e-77	2.68628e-75
SSON53G_RS13700	cvpA	colicin V production protein	-2.28271	74.0141	2.30842e-76	9.68011e-75
SSON53G_RS24525		acetyl-CoA synthetase	5.29742	73.7032	4.75747e-76	1.98043e-74
SSON53G_RS25875	yjiA_2	GTPase	-3.17885	73.6185	5.82506e-76	2.40727e-74
SSON53G_RS01495	gpt	xanthine phosphoribosyltransferase	2.00354	73.0529	2.15787e-75	8.85349e-74
SSON53G_RS02835	fepA	TonB-dependent siderophore receptor	4.39011	72.9952	2.48233e-75	1.0112e-73
SSON53G_RS04585	potG	ABC transporter ATP-binding protein	3.12254	72.6566	5.45088e-75	2.20471e-73
SSON53G_RS22010		transcriptional regulator	2.82695	72.6325	5.8034e-75	2.33076e-73
SSON53G_RS05975	ycfH	DNAse	2.61225	72.631	5.86506e-75	2.33905e-73
SSON53G_RS24850		lysine--tRNA ligase	-2.08648	72.4068	9.89632e-75	3.91935e-73
SSON53G_RS26080	osmY	molecular chaperone OsmY	1.79813	71.9391	2.92557e-74	1.15066e-72
SSON53G_RS05910	maf	septum formation inhibitor Maf	1.79941	71.6029	6.38829e-74	2.49537e-72
SSON53G_RS12130	yeeX	hypothetical protein	-2.18178	71.5564	7.15814e-74	2.77707e-72
SSON53G_RS25685	fecB	Fe(3+)-dicitrate ABC transporter substrate-binding protein FecB	-3.30902	71.2545	1.44425e-73	5.56522e-72
SSON53G_RS21000	gadX	AraC family transcriptional regulator	2.12512	71.1574	1.81844e-73	6.96011e-72
SSON53G_RS04820	ycaC	hydrolase	2.66115	71.1006	2.08634e-73	7.93228e-72
SSON53G_RS21205	ibpA	heat-shock protein IbpA	2.59655	71.0914	2.14538e-73	8.10272e-72
SSON53G_RS12900	fruK	1-phosphofructokinase	-3.47868	70.1239	2.00369e-72	7.5178e-71
SSON53G_RS02510	glsA	glutaminase 1	4.16965	69.7131	5.19379e-72	1.93596e-70
SSON53G_RS14685	tal1	transaldolase 2	2.3595	69.2001	1.7034e-71	6.30812e-70
SSON53G_RS14105	ompD_2	porin OmpD	-2.09134	69.1017	2.15061e-71	7.91284e-70
SSON53G_RS02290	fadM	long-chain acyl-CoA thioesterase FadM	3.38855	69.049	2.44361e-71	8.93329e-70
SSON53G_RS13685	argT	lysine/arginine/ornithine ABC transporter substrate-binding protein ArgT	3.16121	69.0174	2.64487e-71	9.60746e-70
SSON53G_RS20955	sapB_2	MgtC/SapB family protein	3.45895	68.7301	5.15746e-71	1.86158e-69
SSON53G_RS19465	yhcB	hypothetical protein	-1.67896	68.6926	5.65879e-71	2.02969e-69
SSON53G_RS06125	purB	adenylosuccinate lyase	-2.08666	68.4441	1.00901e-70	3.59649e-69
SSON53G_RS00075	dnaJ	molecular chaperone DnaJ	2.14198	68.4155	1.08455e-70	3.84174e-69
SSON53G_RS27275		carbohydrate transporter	-3.09743	68.2852	1.47295e-70	5.18534e-69
SSON53G_RS17270		tRNA-Met	1.96255	68.2453	1.62459e-70	5.68408e-69
SSON53G_RS07265	manX_3	PTS mannose transporter subunit EIIAB	-1.70113	68.1914	1.85061e-70	6.43537e-69
SSON53G_RS09755	mcbR_2	GntR family transcriptional regulator	2.4952	67.9368	3.34625e-70	1.15658e-68
SSON53G_RS02415	ybaN	hypothetical protein	2.43645	67.7784	4.84855e-70	1.66574e-68
SSON53G_RS08510	hypothetical protein	hypothetical protein	2.12884	67.1642	2.00627e-69	6.85137e-68
SSON53G_RS02450	hemH	ferrochelatase	2.1156	67.0981	2.35021e-69	7.97813e-68
SSON53G_RS16390	ygaF	L-2-hydroxyglutarate oxidase	3.21434	66.6432	6.73878e-69	2.27404e-67
SSON53G_RS03620	cydA	cytochrome bd-I ubiquinol oxidase subunit 1	-2.04474	66.5731	7.96636e-69	2.67248e-67
SSON53G_RS13835	fadJ	fatty acid oxidation complex subunit alpha FadJ	2.50829	66.1481	2.13198e-68	7.11033e-67
SSON53G_RS25690		TonB-dependent siderophore receptor	-3.05989	65.7893	4.89954e-68	1.62454e-66
SSON53G_RS07270	hypothetical protein	hypothetical protein	3.82772	65.6086	7.47056e-68	2.46269e-66
SSON53G_RS12800	galS	HTH-type transcriptional regulator GalS	3.14987	65.5516	8.56725e-68	2.80799e-66
SSON53G_RS02625	purK	5-(carboxyamino)imidazole ribonucleotide synthase	-2.64605	65.5171	9.32892e-68	3.04016e-66
SSON53G_RS04595	potI	putrescine ABC transporter permease PotI	3.10404	65.4256	1.1582e-67	3.75296e-66
SSON53G_RS15050	yfhO	IscS subfamily cysteine desulfurase	1.63269	65.0393	2.83526e-67	9.13529e-66
SSON53G_RS12425	yegS	lipid kinase YegS	3.14585	64.5566	8.66461e-67	2.77608e-65
SSON53G_RS17180	sdaC	serine transporter	-2.76318	64.503	9.85766e-67	3.14068e-65
SSON53G_RS14385	mntH	divalent metal cation transporter	3.46988	64.3151	1.52764e-66	4.84007e-65
SSON53G_RS09105	ydeH_1	sensor domain-containing diguanylate cyclase	2.77782	64.1047	2.49384e-66	7.85768e-65
SSON53G_RS02890	entE	2,3-dihydroxybenzoate-AMP ligase	4.03731	63.8709	4.29625e-66	1.34624e-64
SSON53G_RS01925	psiF	phosphate starvation-inducible protein PsiF	3.22365	63.7292	5.98627e-66	1.86556e-64
SSON53G_RS11860	yedU	Molecular chaperone Hsp31 and glyoxalase 3	2.63728	63.4886	1.04835e-65	3.24602e-64
SSON53G_RS19360	yrbL	protein YrbL	-1.61238	63.4886	1.05298e-65	3.24602e-64
SSON53G_RS22055	yhjY	autotransporter domain-containing protein	2.65907	63.3791	1.36234e-65	4.17711e-64
SSON53G_RS18750		NADPH-dependent 2,4-dienoyl-CoA reductase	3.56667	63.3653	1.41392e-65	4.31209e-64
SSON53G_RS02080	tsx	nucleoside-specific channel-forming protein Tsx	-2.27345	63.112	2.54694e-65	7.72616e-64
SSON53G_RS24405	pspG	envelope stress response protein PspG	3.38184	62.9539	3.68528e-65	1.11202e-63
SSON53G_RS11415	hnr	two-component system response regulator RssB	1.97259	62.6514	7.43416e-65	2.23142e-63
SSON53G_RS12700	yehZ	ABC transporter substrate-binding protein	2.37465	62.5525	9.38411e-65	2.80197e-63
SSON53G_RS04575		putrescine/spermidine ABC transporter substrate-binding protein	3.61715	61.6777	7.07162e-64	2.10049e-62
SSON53G_RS24960	fxsA	membrane protein FxsA	2.23052	61.5243	1.0119e-63	2.9901e-62
SSON53G_RS06990	purT	phosphoribosylglycinamide formyltransferase 2	-3.44622	61.2227	2.03717e-63	5.98864e-62
SSON53G_RS14260	frc_1	CoA:oxalate CoA-transferase	3.304	61.0237	3.23798e-63	9.46985e-62
SSON53G_RS17090	eno	enolase	-1.31166	60.8831	4.49857e-63	1.30895e-61
SSON53G_RS10120	sitB_2	manganese transporter	4.3319	60.6198	8.28976e-63	2.39982e-61
SSON53G_RS18950	tdcA	transcriptional regulator	-4.33907	60.0509	3.08824e-62	8.89506e-61
SSON53G_RS10890	acnA	aconitate hydratase AcnA	1.89994	59.9089	4.30396e-62	1.23344e-60
SSON53G_RS09225	hypothetical protein	hypothetical protein	-2.40492	59.1978	2.22386e-61	6.34133e-60
SSON53G_RS04630	artP	arginine ABC transporter ATP-binding protein ArtP	2.36672	59.069	3.00645e-61	8.53024e-60
SSON53G_RS30145	hypothetical protein	hypothetical protein	5.49373	57.9191	4.26744e-60	1.20481e-58
SSON53G_RS00885	hemL	glutamate-1-semialdehyde 2,1-aminomutase	-1.87355	57.8589	4.92542e-60	1.38373e-58
SSON53G_RS03690		tRNA-Lys	2.67012	57.7514	6.33997e-60	1.7724e-58
SSON53G_RS22105	dppF	dipeptide ABC transporter ATP-binding protein	3.06474	57.3327	1.67098e-59	4.64858e-58
SSON53G_RS05200	mgsA	methylglyoxal synthase	-2.07057	57.217	2.19146e-59	6.06694e-58
SSON53G_RS18315		DUF2623 domain-containing protein	5.08402	55.8283	5.38925e-58	1.48478e-56
SSON53G_RS01140		tRNA-Ile	1.8795	55.5312	1.07344e-57	2.94319e-56
SSON53G_RS09945		DUF1338 domain-containing protein	3.26954	55.4051	1.44183e-57	3.93433e-56
SSON53G_RS01930	adrA	diguanylate cyclase AdrA	3.49734	55.3834	1.52297e-57	4.13595e-56
SSON53G_RS24505	actP	cation acetate symporter	3.28381	55.2754	1.96247e-57	5.30424e-56
SSON53G_RS23155	glnA	glutamine synthetase	-1.65673	55.2278	2.1999e-57	5.91795e-56
SSON53G_RS03520	abrB	AbrB family transcriptional regulator	-4.08943	55.0286	3.49692e-57	9.36289e-56
SSON53G_RS27995		glycosyltransferase family 1 protein	-2.82549	54.9657	4.06107e-57	1.08226e-55
SSON53G_RS16385	csiD	protein CsiD	4.02892	54.8754	5.02278e-57	1.33232e-55
SSON53G_RS04680	poxB	ubiquinone-dependent pyruvate dehydrogenase	1.99794	54.7546	6.66429e-57	1.75956e-55
SSON53G_RS30280	hypothetical protein	hypothetical protein	-3.15317	53.7808	6.30286e-56	1.65646e-54
SSON53G_RS03100	ybeD	hypothetical protein	1.85758	53.7226	7.2397e-56	1.89395e-54
SSON53G_RS10840		cyclic di-GMP phosphodiesterase	2.00127	53.5465	1.0911e-55	2.84135e-54
SSON53G_RS25890	hypothetical protein	hypothetical protein	-4.1464	53.473	1.2982e-55	3.36528e-54
SSON53G_RS13840		acetyl-CoA C-acyltransferase FadI	2.8008	53.0447	3.49629e-55	9.02233e-54
SSON53G_RS13455	menF	isochorismate synthase MenF	1.51115	52.9115	4.77204e-55	1.2259e-53
SSON53G_RS16210	raiA	ribosome-associated inhibitor A	-1.53254	52.8564	5.44294e-55	1.39198e-53
SSON53G_RS10130	mntB	metal ABC transporter permease	4.36979	52.8387	5.6938e-55	1.44963e-53
SSON53G_RS09815		spermidine/putrescine ABC transporter permease	3.12452	52.8296	5.84138e-55	1.48059e-53
SSON53G_RS15780	rnc	ribonuclease 3	1.95581	52.8068	6.18277e-55	1.56019e-53
SSON53G_RS17845	fbaA	class II fructose-bisphosphate aldolase	-1.92726	52.7898	6.45798e-55	1.62246e-53
SSON53G_RS09495		ABC transporter substrate-binding protein	3.50851	52.6972	8.02752e-55	2.00794e-53
SSON53G_RS09975		type I glyceraldehyde-3-phosphate dehydrogenase	2.66783	51.8589	5.55652e-54	1.38379e-52
SSON53G_RS17850	pgk	phosphoglycerate kinase	-1.62955	51.842	5.80271e-54	1.43882e-52
SSON53G_RS06040		L,D-transpeptidase	2.78031	51.6485	9.09892e-54	2.24637e-52
SSON53G_RS12840	lysP	lysine transporter	1.3829	51.3606	1.7735e-53	4.35961e-52
SSON53G_RS09720		glutathione S-transferase family protein	3.08534	51.2924	2.08384e-53	5.10049e-52
SSON53G_RS04355	mntS	manganase accumulation protein MntS	2.18554	50.2868	2.12003e-52	5.16689e-51
SSON53G_RS10125	sitC_2	metal ABC transporter permease	4.75913	50.2777	2.17423e-52	5.27644e-51
SSON53G_RS26385	hypothetical protein	hypothetical protein	-2.42887	50.0864	3.39172e-52	8.19617e-51
SSON53G_RS02905	ybdB	proofreading thioesterase EntH	3.18143	49.8477	5.90187e-52	1.42018e-50
SSON53G_RS10765	puuA	glutamine synthetase	2.68259	49.5391	1.20609e-51	2.89005e-50
SSON53G_RS15870	grcA	autonomous glycyl radical cofactor GrcA	-3.04923	49.5258	1.24869e-51	2.97961e-50
SSON53G_RS19735		tRNA-Ile	1.72289	49.5012	1.32704e-51	3.15338e-50
SSON53G_RS04330	hypothetical protein	hypothetical protein	3.38384	49.4565	1.48856e-51	3.49578e-50
SSON53G_RS16395	gabD	succinate-semialdehyde dehydrogenase I	2.81502	49.4565	1.48748e-51	3.49578e-50
SSON53G_RS22555		IlvGMEDA operon leader peptide	-2.20782	49.4565	1.48952e-51	3.49578e-50
SSON53G_RS16905	cysD	sulfate adenylyltransferase subunit 2	-2.72815	49.4133	1.65191e-51	3.86099e-50
SSON53G_RS08530	sufD	signal peptide peptidase SppA	3.39692	49.1879	2.78739e-51	6.48835e-50
SSON53G_RS01915	yaiB	anti-adapter protein IraP	1.69005	49.1578	2.99921e-51	6.95304e-50
SSON53G_RS25035	frdB	fumarate reductase iron-sulfur subunit	-3.1977	49.1018	3.42618e-51	7.91072e-50
SSON53G_RS14540	ucpA	NAD(P)-dependent oxidoreductase	-1.92288	49.075	3.65917e-51	8.41461e-50
SSON53G_RS24935	yjdC	transcriptional regulator	1.6221	49.0367	4.01215e-51	9.18926e-50
SSON53G_RS22450	rbsD	D-ribose pyranase	-2.79842	48.7396	7.98399e-51	1.82131e-49
SSON53G_RS09610	narW	nitrate reductase molybdenum cofactor assembly chaperone	4.79662	48.1323	3.24561e-50	7.37439e-49
SSON53G_RS25470	mgtA	magnesium-translocating P-type ATPase	-2.58231	47.9825	4.60054e-50	1.04115e-48
SSON53G_RS08345		DUF1640 domain-containing protein	1.90412	47.5499	1.25071e-49	2.81929e-48
SSON53G_RS08525	sufC	Fe-S cluster assembly ATPase SufC	3.67287	47.4191	1.69685e-49	3.80989e-48
SSON53G_RS23890		TetR family transcriptional regulator	-1.4858	47.1544	3.13334e-49	7.00761e-48
SSON53G_RS08735	slyB	hypothetical protein	-1.45334	47.1278	3.34484e-49	7.45142e-48
SSON53G_RS09630		flavin reductase family protein	2.7329	47.0985	3.59201e-49	7.97091e-48
SSON53G_RS25675	fecD	Fe3+ dicitrate ABC transporter permease	-3.51943	46.9785	4.75345e-49	1.05073e-47
SSON53G_RS29360	hypothetical protein	hypothetical protein	-2.9266	46.6488	1.0195e-48	2.24488e-47
SSON53G_RS03665	pal	peptidoglycan-associated lipoprotein	-1.38003	46.473	1.53418e-48	3.36517e-47
SSON53G_RS05745	yceA	rhodanese domain-containing protein	1.96685	46.3946	1.84486e-48	4.03113e-47
SSON53G_RS20115		DUF2559 domain-containing protein	2.45729	45.9499	5.15592e-48	1.1223e-46
SSON53G_RS04345	ompX_1	outer membrane protein X	-1.86864	45.6983	9.23749e-48	2.0031e-46
SSON53G_RS25400	ytfQ	sugar ABC transporter substrate-binding protein	3.66097	45.6035	1.15346e-47	2.49175e-46
SSON53G_RS22715		tRNA-Arg	1.63894	45.5887	1.19805e-47	2.5783e-46
SSON53G_RS20130	nirB	nitrite reductase large subunit	-4.79611	45.4984	1.48023e-47	3.17359e-46
SSON53G_RS01490	pepD	cytosol nonspecific dipeptidase	-1.55625	45.0106	4.5692e-47	9.75961e-46
SSON53G_RS08650	ynhF	YnhF family membrane protein	1.50098	44.9843	4.87272e-47	1.03691e-45
SSON53G_RS22590	ilvC	ketol-acid reductoisomerase	-2.83348	44.847	6.70892e-47	1.42234e-45
SSON53G_RS02910	cstA	carbon starvation protein A	1.74218	44.1687	3.2105e-46	6.7813e-45
SSON53G_RS10730	pspA	phage shock protein A	2.21327	44.0491	4.24419e-46	8.93159e-45
SSON53G_RS10640	hypothetical protein	hypothetical protein	1.732	43.7071	9.36273e-46	1.96308e-44
SSON53G_RS20570	yhhX	oxidoreductase	-1.71741	43.7003	9.54536e-46	1.99404e-44
SSON53G_RS14320	dapL	glutamate--pyruvate aminotransferase AlaC	1.63846	43.6687	1.03021e-45	2.14426e-44
SSON53G_RS21805	secB	protein-export protein SecB	-1.67448	43.6553	1.06649e-45	2.2117e-44
SSON53G_RS07910	astE	succinylglutamate desuccinylase	3.2774	43.4987	1.53497e-45	3.17172e-44
SSON53G_RS00045	tal2	transaldolase 1	-1.90304	43.4551	1.70325e-45	3.50673e-44
SSON53G_RS22275	atpC	ATP synthase epsilon chain	-1.75368	43.2385	2.8146e-45	5.77399e-44
SSON53G_RS08520	ynhE	Fe-S cluster assembly protein SufB	3.55831	43.0582	4.27832e-45	8.74526e-44
SSON53G_RS13590	sdcS	transporter	-2.09339	42.9663	5.30642e-45	1.0808e-43
SSON53G_RS08535	sufS	cysteine desulfurase	2.78748	42.9011	6.18787e-45	1.25585e-43
SSON53G_RS06220	minE	cell division topological specificity factor	-1.58848	42.5311	1.45555e-44	2.94361e-43
SSON53G_RS11875	hiuH	5-hydroxyisourate hydrolase	3.99505	42.3731	2.1016e-44	4.23513e-43
SSON53G_RS13130	napA	periplasmic nitrate reductase subunit alpha	-3.61909	42.3436	2.25741e-44	4.5331e-43
SSON53G_RS32910	hypothetical protein	hypothetical protein	1.30521	42.2248	2.97838e-44	5.95989e-43
SSON53G_RS16415	ygaU	peptidoglycan-binding protein LysM	2.6007	42.1309	3.70974e-44	7.39743e-43
SSON53G_RS05980	ptsG	PTS glucose EIICB component	-1.4538	42.0517	4.4672e-44	8.87681e-43
SSON53G_RS20985		efflux RND transporter periplasmic adaptor subunit	3.18208	41.8871	6.54953e-44	1.29694e-42
SSON53G_RS13830	sixA	phosphohistidine phosphatase	1.40245	41.7409	9.20279e-44	1.81604e-42
SSON53G_RS22100	dppD	dipeptide ABC transporter ATP-binding protein	2.49908	41.6473	1.14556e-43	2.2528e-42
SSON53G_RS09485		oxygen-sensing cyclic-di-GMP phosphodiesterase	2.9337	41.4928	1.64052e-43	3.21509e-42
SSON53G_RS04490	yliI	soluble aldose sugar dehydrogenase YliI	2.43566	41.4733	1.72162e-43	3.36247e-42
SSON53G_RS07260	manY_2	PTS mannose/fructose/sorbose transporter subunit IIC	-1.46634	41.3138	2.49415e-43	4.85466e-42
SSON53G_RS22095	dppC	peptide ABC transporter permease	3.16851	41.2539	2.8802e-43	5.57335e-42
SSON53G_RS08385	ydiE	hemin uptake protein HemP	2.91429	41.2539	2.88294e-43	5.57335e-42
SSON53G_RS05165	ompA	outer membrane protein A	-1.24516	40.9715	5.54223e-43	1.06782e-41
SSON53G_RS14490	ptsI	phosphoenolpyruvate--protein phosphotransferase	-1.68176	40.9369	6.02183e-43	1.15631e-41
SSON53G_RS01920	phoA	alkaline phosphatase	1.68381	40.9279	6.16927e-43	1.18065e-41
SSON53G_RS22065	eptB	phosphoethanolamine transferase EptB	1.43806	40.8028	8.25538e-43	1.5746e-41
SSON53G_RS16400	gabT	4-aminobutyrate--2-oxoglutarate transaminase	2.85951	40.7874	8.58244e-43	1.63152e-41
SSON53G_RS26540	ospE2	hypothetical protein	2.85613	40.4692	1.79152e-42	3.39437e-41
SSON53G_RS02895	entB	isochorismatase	4.03816	40.2846	2.74977e-42	5.19269e-41
SSON53G_RS20990	yhiV	multidrug efflux RND transporter permease subunit	2.66774	40.0928	4.29077e-42	8.07599e-41
SSON53G_RS11885	yedZ	sulfoxide reductase heme-binding subunit YedZ	3.00116	39.7354	9.80402e-42	1.83922e-40
SSON53G_RS21810	gpsA	glycerol-3-phosphate dehydrogenase (NAD(P)(+))	-1.3397	39.6262	1.26464e-41	2.36466e-40
SSON53G_RS13845	yiiS_1	DUF406 domain-containing protein	-3.00323	39.6163	1.29809e-41	2.41928e-40
SSON53G_RS11310	tonB	TonB system transport protein TonB	2.00861	39.4511	1.90496e-41	3.53875e-40
SSON53G_RS07325	yeaZ	tRNA (adenosine(37)-N6)-threonylcarbamoyltransferase complex dimerization subunit type 1 TsaB	2.10502	39.4188	2.05913e-41	3.81273e-40
SSON53G_RS08815	rnfA	electron transport complex subunit A	2.02539	39.3781	2.26869e-41	4.18716e-40
SSON53G_RS22285	atpG	ATP synthase subunit gamma	-1.58063	39.2873	2.80498e-41	5.16026e-40
SSON53G_RS23600	pfkA	ATP-dependent 6-phosphofructokinase	-1.57577	39.0043	5.39964e-41	9.90165e-40
SSON53G_RS09155	taqIM	methylase	1.28645	38.9071	6.77638e-41	1.23864e-39
SSON53G_RS09480	dosC_1	diguanylate cyclase	3.21783	38.9057	6.81893e-41	1.24244e-39
SSON53G_RS12750	yohJ	hypothetical protein	-3.08724	38.7765	9.21056e-41	1.67286e-39
SSON53G_RS08710	sodC	superoxide dismutase [Cu-Zn] SodC2	1.85722	38.762	9.55345e-41	1.72963e-39
SSON53G_RS02440	htpG	molecular chaperone HtpG	1.65911	38.7546	9.75064e-41	1.75974e-39
SSON53G_RS12555	minD_3	iron-sulfur cluster carrier protein ApbC	-1.27978	38.692	1.12957e-40	2.03216e-39
SSON53G_RS13295	nrdA	ribonucleoside-diphosphate reductase 1 subunit alpha	-1.55828	38.6834	1.15596e-40	2.07309e-39
SSON53G_RS18350	hypothetical protein	hypothetical protein	-3.02919	38.5666	1.51742e-40	2.71281e-39
SSON53G_RS24245	pgi	glucose-6-phosphate isomerase	-1.21917	38.4126	2.17452e-40	3.86738e-39
SSON53G_RS13300	nrdB	ribonucleotide-diphosphate reductase subunit beta	-1.8395	38.4126	2.1768e-40	3.86738e-39
SSON53G_RS18065	ansB	L-asparaginase 2	-2.27396	38.2335	3.29798e-40	5.84112e-39
SSON53G_RS22290	atpA	ATP synthase subunit alpha	-1.4234	38.2097	3.49445e-40	6.16992e-39
SSON53G_RS07275	yoaE	TerC family protein	2.41043	38.079	4.73599e-40	8.33623e-39
SSON53G_RS14990	ndk	nucleoside-diphosphate kinase	2.02851	38.0445	5.14379e-40	9.02616e-39
SSON53G_RS25015	blc	hypothetical protein	1.53565	37.993	5.80928e-40	1.01627e-38
SSON53G_RS18380	dkgA	2,5-diketo-D-gluconic acid reductase A	2.32092	37.9765	6.05228e-40	1.05554e-38
SSON53G_RS01960	hypothetical protein	hypothetical protein	2.95944	37.8448	8.22255e-40	1.42967e-38
SSON53G_RS04195	hypothetical protein	hypothetical protein	2.832	37.6996	1.15201e-39	1.99694e-38
SSON53G_RS24490	yjcD_3	guanine/hypoxanthine permease GhxP	-2.55795	37.5808	1.51924e-39	2.62552e-38
SSON53G_RS21580	yicE	xanthine permease XanP	-2.1014	37.5064	1.80863e-39	3.1162e-38
SSON53G_RS22270	glmU	bifunctional N-acetylglucosamine-1-phosphate uridyltransferase/glucosamine-1-phosphate acetyltransferase	-1.18804	37.157	4.05531e-39	6.9661e-38
SSON53G_RS30315	hypothetical protein	hypothetical protein	3.89591	37.1467	4.16557e-39	7.13401e-38
SSON53G_RS02420	apt	adenine phosphoribosyltransferase	1.99672	36.847	8.32919e-39	1.4222e-37
SSON53G_RS19095		SCP2 domain-containing protein	-2.06778	36.7905	9.51511e-39	1.61984e-37
SSON53G_RS04620	artQ_1	arginine ABC transporter permease ArtQ	1.80346	36.653	1.30977e-38	2.22311e-37
SSON53G_RS21670		DNA repair protein RadC	-1.70854	36.6111	1.44698e-38	2.44871e-37
SSON53G_RS22485	pdhR_2	GntR family transcriptional regulator	-1.86091	36.5317	1.74235e-38	2.93982e-37
SSON53G_RS09305	ynfM_2	MFS transporter	-2.21498	36.5256	1.77202e-38	2.98108e-37
SSON53G_RS22015	yiaF	DUF3053 domain-containing protein	-1.36952	36.3121	2.90594e-38	4.87429e-37
SSON53G_RS22945	ysgA	carboxymethylenebutenolidase	1.41805	36.2813	3.12831e-38	5.23189e-37
SSON53G_RS20585		gamma-glutamyltransferase	1.97182	36.1932	3.84368e-38	6.40951e-37
SSON53G_RS30675	hypothetical protein	hypothetical protein	-2.50797	36.0859	4.93485e-38	8.20509e-37
SSON53G_RS02810	ybdK	glutamate--cysteine ligase	1.93684	36.008	5.92128e-38	9.81658e-37
SSON53G_RS18320	clcD	dienelactone hydrolase family protein	3.18848	35.8588	8.37438e-38	1.38432e-36
SSON53G_RS13645		thiol:disulfide oxidoreductase	2.78356	35.6083	1.49498e-37	2.46412e-36
SSON53G_RS02445	adk	adenylate kinase	1.34938	35.3425	2.76525e-37	4.54473e-36
SSON53G_RS09055	sad	succinate-semialdehyde dehydrogenase	-3.00082	35.3311	2.84663e-37	4.66503e-36
SSON53G_RS11850		membrane protein	2.32976	35.045	5.51713e-37	9.01553e-36
SSON53G_RS26930		EscV/YscV/HrcV family type III secretion system export apparatus protein	-1.7007	35.0218	5.83619e-37	9.50966e-36
SSON53G_RS08845	add	adenosine deaminase	1.65077	35.0075	6.04904e-37	9.8284e-36
SSON53G_RS21245		transposase	-1.63553	34.9297	7.25733e-37	1.17581e-35
SSON53G_RS02235	hypothetical protein	hypothetical protein	1.33836	34.8659	8.42977e-37	1.3619e-35
SSON53G_RS12895	fruA	PTS fructose transporter subunit IIBC	-2.80585	34.7889	1.00917e-36	1.62579e-35
SSON53G_RS03560	sdhD	succinate dehydrogenase hydrophobic membrane anchor subunit	1.57077	34.7348	1.14642e-36	1.8417e-35
SSON53G_RS00865	fhuA	ferrichrome porin FhuA	1.12646	34.6951	1.25961e-36	2.01786e-35
SSON53G_RS03680		tRNA-Val	1.94841	34.597	1.58325e-36	2.5292e-35
SSON53G_RS04480	rimO	30S ribosomal protein S12 methylthiotransferase RimO	1.91395	34.5264	1.86806e-36	2.97585e-35
SSON53G_RS08515	sufA	iron-sulfur cluster assembly accessory protein	4.16304	34.2786	3.31404e-36	5.26462e-35
SSON53G_RS20355	feoC	ferrous iron transporter C	-3.30587	34.2328	3.69342e-36	5.851e-35
SSON53G_RS31605	focA	formate transporter FocA	-2.18182	34.1834	4.14997e-36	6.55603e-35
SSON53G_RS05500	putA	trifunctional transcriptional regulator/proline dehydrogenase/L-glutamate gamma-semialdehyde dehydrogenase	-1.64654	34.1763	4.22959e-36	6.66336e-35
SSON53G_RS04290	fiu_2	TonB-dependent receptor	4.06601	34.0515	5.65328e-36	8.88173e-35
SSON53G_RS08820	ydgK	membrane protein	1.82086	33.9502	7.15878e-36	1.12161e-34
SSON53G_RS19615	dusB	tRNA dihydrouridine synthase DusB	1.43409	33.8482	9.07746e-36	1.41832e-34
SSON53G_RS00970	tsf	elongation factor Ts	-1.40378	33.8421	9.2307e-36	1.43832e-34
SSON53G_RS25680	fecC	Fe3+ dicitrate ABC transporter permease	-3.44635	33.7236	1.21619e-35	1.8899e-34
SSON53G_RS22915	metE	5-methyltetrahydropteroyltriglutamate-- homocysteine methyltransferase	2.81527	33.6933	1.30763e-35	2.02647e-34
SSON53G_RS03320	nagA_2	N-acetylglucosamine-6-phosphate deacetylase	-1.4114	33.4415	2.34093e-35	3.61797e-34
SSON53G_RS22950	udp	uridine phosphorylase	-1.35187	33.3501	2.89734e-35	4.46582e-34
SSON53G_RS25395	ppa	inorganic pyrophosphatase	-1.2984	33.2	4.10461e-35	6.30959e-34
SSON53G_RS03770	modF	molybdate ABC transporter ATP-binding protein ModF	-1.6019	33.154	4.57551e-35	7.01455e-34
SSON53G_RS14755	purC	phosphoribosylaminoimidazolesuccinocarboxamide synthase	-1.78833	32.9429	7.45946e-35	1.14052e-33
SSON53G_RS19425	nanA	N-acetylneuraminate lyase	-1.92664	32.8335	9.62246e-35	1.4673e-33
SSON53G_RS05000		DUF882 domain-containing protein	1.19024	32.8093	1.02015e-34	1.55144e-33
SSON53G_RS05305	etk1	tyrosine-protein kinase etk	-1.44939	32.7506	1.17082e-34	1.77585e-33
SSON53G_RS27640	hypothetical protein	hypothetical protein	1.42936	32.7491	1.17811e-34	1.78216e-33
SSON53G_RS22480	hsrA	MFS transporter	-2.93233	32.7171	1.27133e-34	1.9181e-33
SSON53G_RS29880	hypothetical protein	hypothetical protein	-2.7541	32.5529	1.86061e-34	2.79975e-33
SSON53G_RS04615	artM_1	arginine ABC transporter permease ArtM	2.07934	32.544	1.90397e-34	2.85745e-33
SSON53G_RS02340	ybaY	hypothetical protein	1.53202	32.538	1.93555e-34	2.89723e-33
SSON53G_RS27500		Vi polysaccharide biosynthesis UDP-N-acetylglucosaminuronic acid C-4 epimerase TviC	-1.17272	32.5011	2.11258e-34	3.15393e-33
SSON53G_RS19815		DUF1992 domain-containing protein	1.93544	32.3934	2.71441e-34	4.04185e-33
SSON53G_RS15045	iscU	iron-sulfur cluster scaffold-like protein	1.40541	32.3266	3.17393e-34	4.71379e-33
SSON53G_RS04205		EEP domain-containing protein	2.64841	32.3067	3.33145e-34	4.93487e-33
SSON53G_RS23780	metF	5,10-methylenetetrahydrofolate reductase	2.5388	32.3047	3.35572e-34	4.95795e-33
SSON53G_RS25700	fecI	RNA polymerase sigma factor FecI	1.84318	32.2655	3.68678e-34	5.42655e-33
SSON53G_RS14250	evgA	DNA-binding response regulator	-1.94391	32.2655	3.69192e-34	5.42655e-33
SSON53G_RS09115	ygaD_2	hypothetical protein	3.56878	32.0772	5.71074e-34	8.37233e-33
SSON53G_RS23350	sodA	superoxide dismutase [Mn]	-1.18141	31.9787	7.18243e-34	1.05029e-32
SSON53G_RS12925		mannitol dehydrogenase family protein	-2.38137	31.967	7.39753e-34	1.07898e-32
SSON53G_RS22515		tRNA-Trp	-2.83618	31.796	1.09944e-33	1.59951e-32
SSON53G_RS11645	yedK	SOS response-associated peptidase	2.08255	31.7713	1.16683e-33	1.69324e-32
SSON53G_RS20645	livK	branched chain amino acid ABC transporter substrate-binding protein	2.99715	31.742	1.25126e-33	1.81115e-32
SSON53G_RS10725	pspB	envelope stress response membrane protein PspB	2.54938	31.7281	1.2954e-33	1.8703e-32
SSON53G_RS08635	ydhC	Bcr/CflA family multidrug efflux MFS transporter	1.48538	31.5316	2.04179e-33	2.94049e-32
SSON53G_RS25880		DUF466 domain-containing protein	-2.83728	31.5082	2.16032e-33	3.10335e-32
SSON53G_RS08085	ihfA	integration host factor subunit alpha	1.00207	31.4428	2.51731e-33	3.60709e-32
SSON53G_RS00035	yaaA	peroxide stress protein YaaA	1.42922	31.3486	3.13522e-33	4.48124e-32
SSON53G_RS13320	glpQ	glycerophosphodiester phosphodiesterase	1.70105	31.2838	3.64918e-33	5.20282e-32
SSON53G_RS19905	rpsQ	30S ribosomal protein S17	-1.43632	31.2784	3.70338e-33	5.26693e-32
SSON53G_RS21070	azr	NAD(P)H-dependent oxidoreductase	-1.65993	31.0728	5.96114e-33	8.45681e-32
SSON53G_RS26740	hypothetical protein	hypothetical protein	-1.39697	30.9295	8.31287e-33	1.17638e-31
SSON53G_RS22905		EamA-like transporter	-2.24917	30.8339	1.0385e-32	1.46598e-31
SSON53G_RS23870	argB	acetylglutamate kinase	2.09721	30.8201	1.07456e-32	1.51314e-31
SSON53G_RS20840	dtpB	dipeptide and tripeptide permease B	-1.84697	30.7243	1.34325e-32	1.88684e-31
SSON53G_RS22760	hemC	hydroxymethylbilane synthase	-1.47925	30.6978	1.43121e-32	2.00545e-31
SSON53G_RS06900	znuC	Mn2+/Zn2+ABC transporter ATP-binding protein	-1.81235	30.5758	1.89994e-32	2.65573e-31
SSON53G_RS23800	gldA	glycerol dehydrogenase	-2.67623	30.5451	2.04423e-32	2.85042e-31
SSON53G_RS15775	era	GTPase Era	1.18323	30.4553	2.51965e-32	3.50477e-31
SSON53G_RS23660	yiiU	cell division protein ZapB	-1.44518	30.4072	2.82169e-32	3.91535e-31
SSON53G_RS13160	yojI	microcin J25 efflux ABC transporter YojI	1.68822	30.3837	2.98579e-32	4.133e-31
SSON53G_RS04130	bioF	8-amino-7-oxononanoate synthase	-2.32929	30.3033	3.60236e-32	4.9744e-31
SSON53G_RS13140	napF	ferredoxin-type protein NapF	-3.84348	30.2559	4.0274e-32	5.54789e-31
SSON53G_RS11625	amyA	alpha-amylase	2.04861	30.0651	6.2641e-32	8.60823e-31
SSON53G_RS17780	rpiA	ribose-5-phosphate isomerase	-1.62261	30.0137	7.06858e-32	9.69041e-31
SSON53G_RS17690	cptA	toxin CptA	-1.36644	29.7302	1.36082e-31	1.86109e-30
SSON53G_RS09420	fdhF	oxidoreductase	3.1767	29.7188	1.40047e-31	1.91073e-30
SSON53G_RS02260	hupB	DNA-binding protein HU-beta	-1.00421	29.3013	3.67122e-31	4.9969e-30
SSON53G_RS04590	potH	putrescine ABC transporter permease	2.87574	29.2786	3.87763e-31	5.26527e-30
SSON53G_RS28230	hypothetical protein	hypothetical protein	1.94006	29.2097	4.55453e-31	6.16971e-30
SSON53G_RS07250	yobD	DUF986 domain-containing protein	-1.91756	29.1603	5.11526e-31	6.91287e-30
SSON53G_RS17245	ygdI	YgdI/YgdR family lipoprotein	1.90068	29.1103	5.75322e-31	7.75665e-30
SSON53G_RS23005	fre	NAD(P)H-flavin reductase	-1.29994	28.9748	7.87806e-31	1.05964e-29
SSON53G_RS03735		glutamate decarboxylase	3.10494	28.7976	1.18752e-30	1.59352e-29
SSON53G_RS21995	glyS	glycine--tRNA ligase subunit beta	-1.20583	28.7654	1.28209e-30	1.71638e-29
SSON53G_RS23000	ubiD	3-octaprenyl-4-hydroxybenzoate decarboxylase	-1.30919	28.7525	1.32394e-30	1.76825e-29
SSON53G_RS11800		DUF2158 domain-containing protein	3.22819	28.7451	1.3497e-30	1.79844e-29
SSON53G_RS08830	hypothetical protein	hypothetical protein	2.62293	28.7346	1.386e-30	1.84251e-29
SSON53G_RS00690	hpt	hypoxanthine phosphoribosyltransferase	-1.5343	28.6865	1.55182e-30	2.05815e-29
SSON53G_RS12415	hypothetical protein	hypothetical protein	3.81837	28.436	2.76957e-30	3.6647e-29
SSON53G_RS18880		glutathione-dependent reductase	1.714	28.3546	3.34795e-30	4.41976e-29
SSON53G_RS00415	leuD	3-isopropylmalate dehydratase small subunit	1.91273	28.3409	3.46344e-30	4.56167e-29
SSON53G_RS05220	yccV	heat-shock protein HspQ	1.29134	28.2334	4.44572e-30	5.84192e-29
SSON53G_RS03220	gltI	glutamate/aspartate ABC transporter substrate-binding protein	1.60264	28.039	6.97247e-30	9.14114e-29
SSON53G_RS25315	cycA	D-serine/D-alanine/glycine transporter	1.42043	27.7288	1.42737e-29	1.86704e-28
SSON53G_RS10855	osmB	osmotically-inducible lipoprotein B	2.35377	27.7064	1.50646e-29	1.96598e-28
SSON53G_RS00420	leuC	3-isopropylmalate dehydratase large subunit	2.16614	27.6519	1.71177e-29	2.22882e-28
SSON53G_RS04625	artI	arginine ABC transporter substrate-binding protein	1.61028	27.5582	2.12875e-29	2.76543e-28
SSON53G_RS13150	eco	ecotin	-1.64786	27.3919	3.12898e-29	4.05559e-28
SSON53G_RS23905	btuB	vitamin B12 transporter BtuB	-1.39277	27.3771	3.24547e-29	4.19704e-28
SSON53G_RS22300	atpF	ATP synthase subunit B	-1.22873	27.0729	6.55254e-29	8.45455e-28
SSON53G_RS30085	hypothetical protein	hypothetical protein	2.5083	26.9732	8.26202e-29	1.06362e-27
SSON53G_RS01415		transpeptidase	1.38429	26.9353	9.03627e-29	1.16067e-27
SSON53G_RS20340	yhgF	RNA-binding transcriptional accessory protein	-1.46674	26.9216	9.34748e-29	1.19795e-27
SSON53G_RS03475	hypothetical protein	hypothetical protein	2.52175	26.907	9.68766e-29	1.23876e-27
SSON53G_RS15075	csiE	stationary phase inducible protein CsiE	1.98074	26.8164	1.19627e-28	1.52625e-27
SSON53G_RS12970	hypothetical protein	hypothetical protein	1.29946	26.7062	1.54859e-28	1.96695e-27
SSON53G_RS21830	lldR	dual role activator/repressor for lldPRD operon	-1.72103	26.7062	1.54526e-28	1.96695e-27
SSON53G_RS17445	thlA_2	acetyl-CoA C-acetyltransferase	1.28879	26.6006	1.97909e-28	2.50817e-27
SSON53G_RS11305	yciA	acyl-CoA thioesterase	1.33507	26.5529	2.21419e-28	2.7999e-27
SSON53G_RS05315	yccZ	O-antigen capsule outer membrane auxillary protein export channel	-1.46543	26.5441	2.2644e-28	2.85705e-27
SSON53G_RS12935	yeiU	lipid A 1-diphosphate synthase	-2.06549	26.5347	2.31919e-28	2.91973e-27
SSON53G_RS20995	gadW	AraC family transcriptional regulator	1.84952	26.5309	2.34961e-28	2.94501e-27
SSON53G_RS00585	guaC	guanosine monophosphate reductase	-1.86107	26.5309	2.3481e-28	2.94501e-27
SSON53G_RS13305	ascD	ferredoxin	-2.48606	26.4684	2.71961e-28	3.40131e-27
SSON53G_RS09410	fumC	class II fumarate hydratase	2.41203	26.426	3.00491e-28	3.74989e-27
SSON53G_RS04805	dmsA_1	dimethylsulfoxide reductase subunit A	-3.24497	26.372	3.41039e-28	4.24661e-27
SSON53G_RS07335	fadD	long-chain-fatty-acid--CoA ligase FadD	1.4146	26.3538	3.56336e-28	4.42742e-27
SSON53G_RS05525	efeO	iron uptake system component EfeO	2.19548	26.335	3.73436e-28	4.62429e-27
SSON53G_RS29870	hypothetical protein	hypothetical protein	1.23306	26.335	3.73803e-28	4.62429e-27
SSON53G_RS06240	pliG	hypothetical protein	-3.20594	26.3319	3.77271e-28	4.6571e-27
SSON53G_RS07035	yobA	CopC domain-containing protein YobA	-1.882	26.3118	3.95967e-28	4.87732e-27
SSON53G_RS05795	grxB	glutaredoxin 2	1.52072	26.2787	4.28253e-28	5.26363e-27
SSON53G_RS16850	rpoS	RNA polymerase sigma factor RpoS	1.28227	26.24	4.69241e-28	5.75502e-27
SSON53G_RS03685		tRNA-Lys	2.31611	26.1809	5.38708e-28	6.59282e-27
SSON53G_RS27100	hypothetical protein	hypothetical protein	-2.71572	26.1219	6.18474e-28	7.55279e-27
SSON53G_RS17175	ygdH	LOG family protein	-0.829854	26.1034	6.46804e-28	7.88189e-27
SSON53G_RS18795	sstT	serine/threonine transporter SstT	1.06068	26.0843	6.77239e-28	8.23517e-27
SSON53G_RS13595		sugar phosphatase	-1.30894	26.0007	8.22852e-28	9.98453e-27
SSON53G_RS19620	fis	Fis family transcriptional regulator	1.16219	25.9431	9.4152e-28	1.14002e-26
SSON53G_RS11890	zinT	metal-binding protein ZinT	-2.61648	25.9318	9.6827e-28	1.16992e-26
SSON53G_RS00950	dapD	2,3,4,5-tetrahydropyridine-2,6-dicarboxylate N-succinyltransferase	-1.00328	25.8878	1.07385e-27	1.29475e-26
SSON53G_RS08595		FAD/NAD(P) binding domain-containing protein	2.24102	25.872	1.11608e-27	1.34282e-26
SSON53G_RS28160	hypothetical protein	hypothetical protein	3.15285	25.8335	1.222e-27	1.46717e-26
SSON53G_RS07385	ymgE	GlsB/YeaQ/YmgE family stress response membrane protein	1.57627	25.7601	1.45004e-27	1.7373e-26
SSON53G_RS09490	ddpX	D-alanyl-D-alanine dipeptidase	3.03703	25.5836	2.182e-27	2.60879e-26
SSON53G_RS16985	cysJ	assimilatory sulfite reductase (NADPH) flavoprotein subunit	-1.7897	25.5739	2.23568e-27	2.66738e-26
SSON53G_RS23880	oxyR	DNA-binding transcriptional regulator OxyR	-1.26506	25.5692	2.26494e-27	2.69665e-26
SSON53G_RS16405	gabP	GABA permease	2.78568	25.5573	2.33252e-27	2.77132e-26
SSON53G_RS19430	yhcK	transcriptional regulator NanR	-1.38364	25.5229	2.52985e-27	2.99953e-26
SSON53G_RS24435	alphA	acid phosphatase AphA	-1.90206	25.5202	2.551e-27	3.01833e-26
SSON53G_RS11795	yedQ	cellulose biosynthesis regulator YedQ	1.42358	25.4705	2.86633e-27	3.3844e-26
SSON53G_RS15600		iron-regulated protein	2.7147	25.3448	3.83615e-27	4.52016e-26
SSON53G_RS19665	hypothetical protein	hypothetical protein	3.16288	25.2666	4.60268e-27	5.41219e-26
SSON53G_RS32370	hypothetical protein	hypothetical protein	-1.48517	25.1984	5.39675e-27	6.33286e-26
SSON53G_RS18675	yqjI	PadR family transcriptional regulator	-2.05064	25.189	5.52605e-27	6.47127e-26
SSON53G_RS05410	cbpA	curved DNA-binding protein	1.37278	25.098	6.82811e-27	7.97965e-26
SSON53G_RS16465		DUF883 domain-containing protein	3.18183	25.0654	7.3752e-27	8.60139e-26
SSON53G_RS19090		N-acetyltransferase	-1.69712	25.0248	8.11576e-27	9.44575e-26
SSON53G_RS25405	ytfR	sugar ABC transporter ATP-binding protein	2.26568	24.9819	8.97668e-27	1.04265e-25
SSON53G_RS10720	pspC	envelope stress response membrane protein PspC	2.15509	24.9184	1.04098e-26	1.20665e-25
SSON53G_RS08545	ynhG	LysM peptidoglycan-binding domain-containing protein	1.40503	24.9183	1.04331e-26	1.2069e-25
SSON53G_RS22800		DNA-dependent helicase	-1.11607	24.8589	1.1988e-26	1.38396e-25
SSON53G_RS04540	ybjL	transporter	1.16682	24.8244	1.30043e-26	1.49826e-25
SSON53G_RS16455	alaE	L-alanine exporter AlaE	1.68495	24.6386	1.99878e-26	2.2982e-25
SSON53G_RS21685	mutM	formamidopyrimidine-DNA glycosylase	1.72126	24.57	2.34554e-26	2.69147e-25
SSON53G_RS05425	yccJ	hypothetical protein	1.6784	24.5635	2.38579e-26	2.73216e-25
SSON53G_RS08555	pykF	pyruvate kinase I	-1.14123	24.5532	2.44787e-26	2.79764e-25
SSON53G_RS19205	glmM	phosphoglucosamine mutase	-1.18992	24.5073	2.72652e-26	3.10986e-25
SSON53G_RS12230	wzzB	LPS O-antigen chain length determinant protein WzzB	1.30644	24.4806	2.90519e-26	3.30704e-25
SSON53G_RS21445	iucA	aerobactin synthase IucA	2.55358	24.4631	3.03039e-26	3.44269e-25
SSON53G_RS20710	tusA	sulfurtransferase TusA	1.89891	24.4545	3.09734e-26	3.51175e-25
SSON53G_RS14945	xseA	exodeoxyribonuclease VII large subunit	1.53961	24.4429	3.19018e-26	3.60696e-25
SSON53G_RS20345	feoA	ferrous iron transporter A	-3.67115	24.4429	3.19396e-26	3.60696e-25
SSON53G_RS12420	hypothetical protein	hypothetical protein	4.00804	24.3599	3.87403e-26	4.36632e-25
SSON53G_RS18125	yqgA	DUF554 domain-containing protein	-2.85531	24.3097	4.35722e-26	4.90122e-25
SSON53G_RS16075	smpB	SsrA-binding protein	-1.40151	24.2302	5.24224e-26	5.88514e-25
SSON53G_RS10625	tyrR	transcriptional regulator TyrR	-1.13087	24.0981	7.1212e-26	7.97882e-25
SSON53G_RS12550		DUF2574 domain-containing protein	2.05751	24.0625	7.74472e-26	8.66042e-25
SSON53G_RS09040	yneF	GGDEF domain-containing protein	1.9412	23.99	9.16864e-26	1.02326e-24
SSON53G_RS10620	tpx	thiol peroxidase	-1.23169	23.9231	1.07162e-25	1.19364e-24
SSON53G_RS06175		diguanylate phosphodiesterase	2.94791	23.7593	1.56583e-25	1.74073e-24
SSON53G_RS23875	argH	argininosuccinate lyase	1.52672	23.7427	1.62992e-25	1.80845e-24
SSON53G_RS23665	rraA	ribonuclease E activity regulator RraA	-1.63346	23.6521	2.01184e-25	2.22787e-24
SSON53G_RS09500	ddpB	ABC transporter permease	2.53075	23.5655	2.46066e-25	2.7196e-24
SSON53G_RS11560	ipk	4-diphosphocytidyl-2C-methyl-D-erythritol kinase	-1.19928	23.4408	3.28536e-25	3.62406e-24
SSON53G_RS05530	efeB	deferrochelatase/peroxidase EfeB	1.42749	23.3984	3.62927e-25	3.9957e-24
SSON53G_RS17705	yqfA	hemolysin III family protein	1.03058	23.3483	4.08054e-25	4.48388e-24
SSON53G_RS05225		23S rRNA (cytosine(1962)-C(5))-methyltransferase RlmI	1.19918	23.167	6.20736e-25	6.80781e-24
SSON53G_RS02960		alkyl hydroperoxide reductase subunit F	1.12347	22.9743	9.69145e-25	1.06085e-23
SSON53G_RS18335	yghA	NAD(P)-dependent oxidoreductase	1.94877	22.9472	1.03367e-24	1.12932e-23
SSON53G_RS05005		MBL fold metallo-hydrolase	1.0162	22.9169	1.11056e-24	1.211e-23
SSON53G_RS11790	yedP	mannosyl-3-phosphoglycerate phosphatase-related protein	2.01118	22.9115	1.12638e-24	1.22591e-23
SSON53G_RS06455		tRNA-Leu	1.52332	22.8718	1.23676e-24	1.34348e-23
SSON53G_RS06115	phoQ	sensor protein PhoQ	-1.2171	22.8051	1.44487e-24	1.56656e-23
SSON53G_RS05240	yccA_2	BAX inhibitor protein	0.85916	22.7214	1.75523e-24	1.89944e-23
SSON53G_RS26830		IpaC/SipC family type III secretion system effector	-1.75447	22.713	1.79279e-24	1.93642e-23
SSON53G_RS10485		amidohydrolase	-3.1135	22.6984	1.8577e-24	2.00273e-23
SSON53G_RS13170	ada	bifunctional DNA-binding transcriptional regulator/O6-methylguanine-DNA methyltransferase Ada	1.61651	22.4648	3.18658e-24	3.42888e-23
SSON53G_RS25860		penicillin acylase	1.58658	22.4497	3.30601e-24	3.55069e-23
SSON53G_RS10095		DUF333 domain-containing protein	1.87546	22.4475	3.32879e-24	3.56843e-23
SSON53G_RS31735	hypothetical protein	hypothetical protein	1.6832	22.4345	3.43651e-24	3.677e-23
SSON53G_RS11970	yeeN_1	YebC/PmpR family DNA-binding transcriptional regulator	-1.75258	22.416	3.59312e-24	3.83737e-23
SSON53G_RS00055	yaaH	succinate-acetate/proton symporter SatP	1.66514	22.29	4.81113e-24	5.12858e-23
SSON53G_RS01905	ddl_2	D-alanine--D-alanine ligase A	-1.09829	22.2164	5.70975e-24	6.07513e-23
SSON53G_RS17905	tktA	transketolase	-1.17701	22.2152	5.73634e-24	6.09206e-23
SSON53G_RS03640	ybgC	acyl-CoA thioester hydrolase YbgC	1.42005	22.2103	5.81208e-24	6.16102e-23
SSON53G_RS22965		ubiquinone biosynthesis protein UbiJ	-1.2571	22.1567	6.58784e-24	6.9704e-23
SSON53G_RS24075	hupA	DNA-binding protein HU-alpha	-1.4424	22.1172	7.22854e-24	7.63414e-23
SSON53G_RS26050		tRNA-Leu	1.05773	22.1088	7.38441e-24	7.78434e-23
SSON53G_RS13880	yfdC	transporter	2.21548	22.0643	8.19501e-24	8.6229e-23
SSON53G_RS21430	iucD	lysine 6-monooxygenase	2.97383	21.9916	9.70806e-24	1.01961e-22
SSON53G_RS03625	cydB1	cytochrome bd-I ubiquinol oxidase subunit 2	-1.67951	21.81	1.47746e-23	1.54889e-22
SSON53G_RS16565		tRNA-Arg	2.10669	21.7599	1.66115e-23	1.73826e-22
SSON53G_RS22280	atpD	ATP synthase subunit beta	-1.36072	21.7579	1.6719e-23	1.74631e-22
SSON53G_RS12785	mglC	galactoside ABC transporter permease	1.77544	21.5263	2.85469e-23	2.97629e-22
SSON53G_RS24385	zur	transcriptional regulator Zur	-1.84947	21.4133	3.71037e-23	3.86136e-22
SSON53G_RS19075	yhbO	glutamine amidotransferase	2.6156	21.4081	3.76168e-23	3.90762e-22
SSON53G_RS21750	rfaF	ADP-heptose--LPS heptosyltransferase 2	-1.50469	21.3362	4.44656e-23	4.61068e-22
SSON53G_RS06980	edd	phosphogluconate dehydratase	-1.56635	21.2693	5.19698e-23	5.37902e-22
SSON53G_RS25605		DUF853 domain-containing protein	1.93487	21.2398	5.57172e-23	5.75644e-22
SSON53G_RS09475		glycoside hydrolase family 10 protein	1.75489	21.2164	5.89084e-23	6.07513e-22
SSON53G_RS09395	rstA	DNA-binding response regulator	-1.44738	21.1597	6.72487e-23	6.92274e-22
SSON53G_RS05205	yccT	DUF2057 domain-containing protein	2.18658	21.1544	6.81936e-23	7.00736e-22
SSON53G_RS18590	ygiM	signal transduction protein	1.36944	20.9347	1.13303e-22	1.16217e-21
SSON53G_RS13540	nuoG	NADH-quinone oxidoreductase subunit NuoG	-1.09054	20.9153	1.18694e-22	1.21529e-21
SSON53G_RS19805	arfA	ribosome alternative rescue factor ArfA	1.8306	20.8598	1.35135e-22	1.38113e-21
SSON53G_RS09830		GntR family transcriptional regulator	1.62906	20.8128	1.50828e-22	1.53877e-21
SSON53G_RS29540	hypothetical protein	hypothetical protein	2.1024	20.76	1.70657e-22	1.73796e-21
SSON53G_RS13180	ompC	phosphoporin PhoE	-0.947176	20.7384	1.79677e-22	1.82655e-21
SSON53G_RS10935	yciN	hypothetical protein	-1.18948	20.6939	1.99384e-22	2.02329e-21
SSON53G_RS24005	rplL	50S ribosomal protein L7/L12	-1.09635	20.6788	2.0683e-22	2.09512e-21
SSON53G_RS28435		quinolinate synthetase	4.49357	20.6577	2.17513e-22	2.19943e-21
SSON53G_RS22470	rbsK_1	ribokinase	-1.74369	20.6408	2.26526e-22	2.2865e-21
SSON53G_RS17790	argP	chromosome initiation inhibitor	-1.19406	20.6359	2.29494e-22	2.31237e-21
SSON53G_RS19390	gltD	glutamate synthase	1.1295	20.5925	2.54109e-22	2.55588e-21
SSON53G_RS14565	yfeX	deferrochelatase/peroxidase	-1.38721	20.58	2.61947e-22	2.63008e-21
SSON53G_RS21620	yicG_2	trimeric intracellular cation channel family protein	-3.09318	20.5592	2.75321e-22	2.7595e-21
SSON53G_RS32190	hypothetical protein	hypothetical protein	3.21443	20.4825	3.29025e-22	3.29198e-21
SSON53G_RS03470	phrB	deoxyribodipyrimidine photo-lyase	1.573	20.4809	3.30843e-22	3.30437e-21
SSON53G_RS18505		DUF4051 domain-containing protein	-2.25103	20.4208	3.80601e-22	3.7947e-21
SSON53G_RS11960		FMN/FAD transporter	1.64067	20.406	3.94459e-22	3.926e-21
SSON53G_RS21075	hypothetical protein	hypothetical protein	-1.71191	20.4008	3.99978e-22	3.974e-21
SSON53G_RS21575		AsmA family protein	-1.23293	20.3886	4.12107e-22	4.08738e-21
SSON53G_RS02655		allantoinase	2.12812	20.3785	4.22453e-22	4.18272e-21
SSON53G_RS03160	hypothetical protein	hypothetical protein	1.15591	20.372	4.29619e-22	4.2463e-21
SSON53G_RS21755	rfaD	ADP-L-glycero-D-mannoheptose-6-epimerase	-1.41411	20.3217	4.83251e-22	4.76813e-21
SSON53G_RS17350	nudH	RNA pyrophosphohydrolase	-1.03662	20.3134	4.93325e-22	4.85913e-21
SSON53G_RS20040	slyD	peptidylprolyl isomerase	-1.07034	20.2765	5.38111e-22	5.29112e-21
SSON53G_RS16490	proV_1	proline/glycine betaine ABC transporter ATP-binding protein ProV	-2.13384	20.2719	5.44719e-22	5.34687e-21
SSON53G_RS18645	dnaG	DNA primase	1.10713	20.2642	5.55367e-22	5.44203e-21
SSON53G_RS24825	yjdH	two-component system sensor histidine kinase DcuS	-1.4961	20.2388	5.89839e-22	5.7699e-21
SSON53G_RS21785	envC	murein hydrolase activator EnvC	-1.22939	20.2034	6.41049e-22	6.2601e-21
SSON53G_RS18545	glgS	glycogen synthase	1.41781	20.1801	6.77543e-22	6.60518e-21
SSON53G_RS18905	hypothetical protein	hypothetical protein	-1.19981	20.1708	6.93457e-22	6.74878e-21
SSON53G_RS20835	uspA	universal stress protein A	-0.947571	20.1549	7.20428e-22	6.99932e-21
SSON53G_RS10490	abgB	amidohydrolase	-3.16303	20.1023	8.14679e-22	7.90155e-21
SSON53G_RS25670	fecE	ferric citrate ABC transporter ATP-binding protein FecE	-2.82849	20.0964	8.27244e-22	8.0098e-21
SSON53G_RS08540	sufE	cysteine desulfuration protein SufE	2.55031	20.071	8.78592e-22	8.49256e-21
SSON53G_RS03215	gltJ	amino acid ABC transporter permease	1.02043	20.0616	8.99311e-22	8.67812e-21
SSON53G_RS12240		phosphogluconate dehydrogenase (NADP(+)-dependent, decarboxylating)	-1.08587	20.0177	9.96622e-22	9.6009e-21
SSON53G_RS01610	lutB	iron-sulfur cluster-binding protein	1.55816	19.9977	1.04541e-21	1.00539e-20
SSON53G_RS04720	ybjX	DUF535 domain-containing protein	-1.84317	19.9763	1.09993e-21	1.05604e-20
SSON53G_RS22780	dapF	diaminopimelate epimerase	-1.4214	19.9604	1.14295e-21	1.0955e-20
SSON53G_RS22970	ubiB	ubiquinone biosynthesis protein UbiB	-1.1563	19.9044	1.30247e-21	1.24631e-20
SSON53G_RS24785		hypothetical protein	0.826451	19.8834	1.3692e-21	1.30796e-20
SSON53G_RS12140	gyrI	DNA gyrase inhibitor SbmC	3.00616	19.88	1.38226e-21	1.31823e-20
SSON53G_RS25450	nrdD	anaerobic ribonucleoside-triphosphate reductase	-1.35882	19.8422	1.51066e-21	1.43828e-20
SSON53G_RS06015	ycfP	hypothetical protein	-1.21853	19.8098	1.63008e-21	1.54939e-20
SSON53G_RS11880	yedY	mononuclear molybdenum enzyme YedY	2.36558	19.7927	1.69869e-21	1.61192e-20
SSON53G_RS25355	ytfJ	YtfJ family protein	1.46294	19.7472	1.88932e-21	1.78984e-20
SSON53G_RS20385	gntY	Fe-S biogenesis protein NfuA	1.29023	19.7417	1.91657e-21	1.81264e-20
SSON53G_RS18445	ygiN	quinol monooxygenase YgiN	-0.933819	19.7233	2.0029e-21	1.89114e-20
SSON53G_RS20300	hslR	heat-shock protein 15	1.38617	19.5992	2.66946e-21	2.51635e-20
SSON53G_RS22235		AsmA family protein	1.27258	19.5892	2.73659e-21	2.57538e-20
SSON53G_RS07205	hypothetical protein	hypothetical protein	1.62324	19.5862	2.76015e-21	2.59327e-20
SSON53G_RS10845	yciZ	hypothetical protein	1.18355	19.5488	3.01311e-21	2.82628e-20
SSON53G_RS23020	pepQ	Xaa-Pro dipeptidase	-1.21384	19.4939	3.42482e-21	3.20718e-20
SSON53G_RS23025	yigZ	IMPACT family member YigZ	-1.15647	19.3973	4.28494e-21	4.00607e-20
SSON53G_RS03630	ybgT	cytochrome bd-I oxidase subunit CydX	-1.59226	19.3036	5.32484e-21	4.97014e-20
SSON53G_RS32860		hypothetical protein	0.995822	19.2225	6.42955e-21	5.99146e-20
SSON53G_RS05905	rluC	ribosomal large subunit pseudouridine synthase C	1.65856	19.1959	6.84616e-21	6.36928e-20
SSON53G_RS09290	bioD2	ATP-dependent dethiobiotin synthetase BioD	-1.83919	19.1789	7.13191e-21	6.62432e-20
SSON53G_RS24970	groES	molecular chaperone GroES	1.02692	19.1279	8.03223e-21	7.44843e-20
SSON53G_RS01525		tRNA-Thr	-2.24622	19.0857	8.8671e-21	8.20926e-20
SSON53G_RS19595	accC	acetyl-CoA carboxylase biotin carboxylase subunit	-0.920438	19.0819	8.96025e-21	8.28206e-20
SSON53G_RS19375	arcB	hybrid sensor histidine kinase/response regulator	-1.09924	19.0532	9.58745e-21	8.84745e-20
SSON53G_RS07945	osmE	osmotically-inducible lipoprotein E	0.947286	19.0487	9.70368e-21	8.94024e-20
SSON53G_RS23125	engB	GTP-binding protein	-1.22275	19.0125	1.05618e-20	9.71519e-20
SSON53G_RS22465		D-ribose ABC transporter substrate-binding protein RbsB	-0.999476	18.99	1.11418e-20	1.02321e-19
SSON53G_RS19440	sspB	stringent starvation protein B	-1.01759	18.91	1.3417e-20	1.23018e-19
SSON53G_RS30540		hypothetical protein	0.853594	18.8394	1.58127e-20	1.44751e-19
SSON53G_RS05365	gnsA	protein GnsA	-2.12323	18.8384	1.58733e-20	1.45073e-19
SSON53G_RS16990	queD	6-carboxytetrahydropterin synthase QueD	1.39857	18.8343	1.605e-20	1.46453e-19
SSON53G_RS00145	rpsT	30S ribosomal protein S20	1.44207	18.8201	1.66086e-20	1.51308e-19
SSON53G_RS05030	pncB	nicotinate phosphoribosyltransferase	1.23706	18.774	1.85003e-20	1.68273e-19
SSON53G_RS00430	leuA	2-isopropylmalate synthase	1.91871	18.7432	1.98904e-20	1.80629e-19
SSON53G_RS30820	hypothetical protein	hypothetical protein	-4.24481	18.6951	2.22568e-20	2.01797e-19
SSON53G_RS13400	arnA	bifunctional UDP-glucuronic acid oxidase/UDP-4-amino-4-deoxy-L-arabinose formyltransferase	1.6213	18.6847	2.28332e-20	2.06695e-19
SSON53G_RS13560	nuoB	NADH-quinone oxidoreductase subunit B	-1.07785	18.6662	2.38645e-20	2.15688e-19
SSON53G_RS11490	ychN	hypothetical protein	-1.43314	18.6541	2.4576e-20	2.21767e-19
SSON53G_RS20110	fic	cell filamentation protein Fic	2.05816	18.6524	2.47102e-20	2.22626e-19
SSON53G_RS11900	hypothetical protein	hypothetical protein	2.03806	18.6451	2.5173e-20	2.26438e-19
SSON53G_RS07915	spy	ATP-independent periplasmic protein-refolding chaperone	2.953	18.5169	3.38656e-20	3.04151e-19
SSON53G_RS09425	safA	two-component-system connector protein SafA	3.87317	18.4689	3.78869e-20	3.39731e-19
SSON53G_RS23545	hypothetical protein	hypothetical protein	-1.33721	18.467	3.81098e-20	3.41193e-19
SSON53G_RS14280	yfdX	hypothetical protein	3.04324	18.4662	3.82407e-20	3.41829e-19
SSON53G_RS02025	brnQ	branched-chain amino acid transport system 2 carrier protein	1.00731	18.4333	4.13119e-20	3.68704e-19
SSON53G_RS14535	cysP	sulfate ABC transporter substrate-binding protein	-1.53606	18.4069	4.3971e-20	3.91823e-19
SSON53G_RS19500	yhcO	barnase inhibitor	2.04109	18.32	5.38019e-20	4.78678e-19
SSON53G_RS23655	glpF_2	aquaporin	1.96999	18.2988	5.65791e-20	5.02602e-19
SSON53G_RS03670	ygbF	cell division protein CpoB	-0.907851	18.2497	6.34488e-20	5.62751e-19
SSON53G_RS09685	hypothetical protein	hypothetical protein	1.24867	18.2487	6.36919e-20	5.64029e-19
SSON53G_RS20550	gntU	gluconate transporter	-2.77985	18.188	7.33674e-20	6.48704e-19
SSON53G_RS04200	ybhO	cardiolipin synthase ClsB	1.97475	18.1848	7.4019e-20	6.53453e-19
SSON53G_RS09380		arginine/ornithine antiporter transporter	1.60408	18.1826	7.4505e-20	6.56726e-19
SSON53G_RS04135	bioC	malonyl-[acyl-carrier protein] O-methyltransferase BioC	-2.23582	18.1557	7.93903e-20	6.98708e-19
SSON53G_RS10450	dbpA	ATP-dependent RNA helicase DbpA	1.0783	18.1223	8.58789e-20	7.5465e-19
SSON53G_RS04640	hypothetical protein	hypothetical protein	1.46358	18.0845	9.38312e-20	8.2326e-19
SSON53G_RS13410	arnT	4-amino-4-deoxy-L-arabinose lipid A transferase	1.48016	18.0825	9.43942e-20	8.26928e-19
SSON53G_RS04910	ihfB	integration host factor subunit beta	0.84472	18.0605	9.9455e-20	8.69927e-19
SSON53G_RS25985	mdoB	phosphoglycerol transferase I	-1.2537	18.0287	1.07179e-19	9.36048e-19
SSON53G_RS30260		elongation factor Tu	-1.36973	17.9669	1.23757e-19	1.07918e-18
SSON53G_RS25025	frdD	fumarate reductase subunit D	-1.56881	17.9601	1.25912e-19	1.0963e-18
SSON53G_RS13555	nuoC	NADH-quinone oxidoreductase subunit C/D	-1.09029	17.9045	1.43321e-19	1.24597e-18
SSON53G_RS04800	serS	serine--tRNA ligase	-1.0109	17.8832	1.50766e-19	1.30871e-18
SSON53G_RS19335	rpoN	RNA polymerase sigma-54 factor	-0.809494	17.8091	1.79056e-19	1.55191e-18
SSON53G_RS25255		DUF1471 domain-containing protein	4.06736	17.8077	1.79912e-19	1.55696e-18
SSON53G_RS21825	lldD	alpha-hydroxy-acid oxidizing enzyme	-1.55942	17.8	1.83414e-19	1.58486e-18
SSON53G_RS23640	fpr	ferredoxin--NADP(+) reductase	-1.64995	17.7979	1.84576e-19	1.59249e-18
SSON53G_RS20085		hypothetical protein	-0.985125	17.7857	1.90128e-19	1.63792e-18
SSON53G_RS05775	bssS	biofilm regulator BssS	1.11214	17.6816	2.41971e-19	2.08139e-18
SSON53G_RS12835	hypothetical protein	hypothetical protein	2.73428	17.6795	2.43512e-19	2.09149e-18
SSON53G_RS12235	ugd	UDP-glucose 6-dehydrogenase	2.01814	17.675	2.46417e-19	2.11326e-18
SSON53G_RS19675	artQ_2	amino acid ABC transporter permease	2.04064	17.6104	2.86417e-19	2.45261e-18
SSON53G_RS16855	nlpD_1	murein hydrolase activator NlpD	1.20413	17.6022	2.92317e-19	2.49938e-18
SSON53G_RS27935		transfer-messenger RNA	0.957611	17.5936	2.98576e-19	2.54907e-18
SSON53G_RS06100	hypothetical protein	hypothetical protein	2.08804	17.5318	3.44741e-19	2.9388e-18
SSON53G_RS26835	sipB	type III secretion system needle tip complex protein SipB	-1.62068	17.4573	4.0986e-19	3.4887e-18
SSON53G_RS19630		DUF2556 domain-containing protein	3.28861	17.4097	4.5806e-19	3.89317e-18
SSON53G_RS16420	yqaE	YqaE/Pmp3 family membrane protein	1.42192	17.3915	4.79048e-19	4.05945e-18
SSON53G_RS21850	yibL	DUF2810 domain-containing protein	-1.02724	17.3915	4.78567e-19	4.05945e-18
SSON53G_RS25030	frdC	fumarate reductase subunit C	-2.07289	17.3803	4.92331e-19	4.16582e-18
SSON53G_RS10455	hypothetical protein	hypothetical protein	4.66734	17.3728	5.01666e-19	4.23852e-18
SSON53G_RS06225	minD_1	septum site-determining protein MinD	-1.15823	17.1712	7.99191e-19	6.74229e-18
SSON53G_RS14975	ispG	4-hydroxy-3-methylbut-2-en-1-yl diphosphate synthase (flavodoxin)	-1.03458	17.1515	8.3756e-19	7.05555e-18
SSON53G_RS16125	ffh	signal recognition particle protein	-1.04882	17.1078	9.27549e-19	7.80208e-18
SSON53G_RS22980	tatB	twin-arginine translocase subunit TatB	-1.07385	17.0967	9.53405e-19	8.00354e-18
SSON53G_RS13600	yfbU	YfbU family protein	-1.33604	17.0967	9.54306e-19	8.00354e-18
SSON53G_RS29550	hypothetical protein	hypothetical protein	2.06348	17.0714	1.01308e-18	8.48402e-18
SSON53G_RS03440		DUF2517 domain-containing protein	-1.6847	17.0528	1.05891e-18	8.85479e-18
SSON53G_RS03705	nadA	quinolinate synthase NadA	5.01988	16.9768	1.26327e-18	1.05482e-17
SSON53G_RS04730	ybjZ	macrolide ABC transporter permease/ATP-binding protein MacB	1.18233	16.9339	1.39657e-18	1.16442e-17
SSON53G_RS04985	mukB	chromosome partition protein MukB	-1.11022	16.9297	1.4121e-18	1.17565e-17
SSON53G_RS26925		YopN family type III secretion system gatekeeper subunit	-2.23681	16.9179	1.45304e-18	1.20797e-17
SSON53G_RS24080		DUF1481 domain-containing protein	-1.54906	16.9011	1.51268e-18	1.25572e-17
SSON53G_RS03945		tRNA-Met	1.12989	16.8294	1.78703e-18	1.48131e-17
SSON53G_RS00880	fhuB	Fe(3+)-hydroxamate ABC transporter permease FhuB	1.51126	16.8261	1.80327e-18	1.4926e-17
SSON53G_RS22755	hemD	uroporphyrinogen-III synthase	-1.32122	16.8174	1.84234e-18	1.52273e-17
SSON53G_RS08660	sodB	superoxide dismutase [Fe]	-1.77366	16.8092	1.88004e-18	1.55165e-17
SSON53G_RS29005	hypothetical protein	hypothetical protein	3.11397	16.8072	1.89127e-18	1.55866e-17
SSON53G_RS13380	nudI	nucleoside triphosphatase	-1.74134	16.7862	1.98827e-18	1.63624e-17
SSON53G_RS09850		collagenase-like protease	1.16182	16.767	2.08081e-18	1.70992e-17
SSON53G_RS14695		DUF1176 domain-containing protein	1.34714	16.7067	2.39442e-18	1.96481e-17
SSON53G_RS26920		EscC/YscC/HrcC family type III secretion system outer membrane ring protein	-1.34692	16.6513	2.72425e-18	2.23224e-17
SSON53G_RS24420	alr	alanine racemase biosynthetic	-1.32808	16.6252	2.89707e-18	2.37044e-17
SSON53G_RS17750	pepP	Xaa-Pro aminopeptidase	-1.02888	16.624	2.90926e-18	2.37701e-17
SSON53G_RS11640	yeeD_2	SirA-like protein	-2.80949	16.6096	3.01173e-18	2.45721e-17
SSON53G_RS25600	yjgQ	LPS export ABC transporter permease LptG	-0.923924	16.6056	3.04358e-18	2.47965e-17
SSON53G_RS16760	hypB	hydrogenase isoenzymes nickel incorporation protein HypB	-3.51139	16.586	3.18834e-18	2.59388e-17
SSON53G_RS03720	pnuC	nicotinamide riboside transporter PnuC	4.30938	16.5632	3.36527e-18	2.73392e-17
SSON53G_RS05310	etp	protein-tyrosine-phosphatase	-1.40361	16.5258	3.67288e-18	2.97958e-17
SSON53G_RS08610		tRNA-Val	1.23126	16.5192	3.73524e-18	3.02586e-17
SSON53G_RS26845	ipgB	protein ipgB	-1.69416	16.5186	3.74532e-18	3.02973e-17
SSON53G_RS22785		DUF484 domain-containing protein	-1.73044	16.5157	3.77594e-18	3.05016e-17
SSON53G_RS24465	yjcC	EAL domain-containing protein	1.6372	16.5139	3.79644e-18	3.06239e-17
SSON53G_RS17145	mioC_1	flavodoxin	-1.48137	16.4991	3.93397e-18	3.16884e-17
SSON53G_RS22765	cyaA	adenylate cyclase	-0.763606	16.4867	4.05326e-18	3.26033e-17
SSON53G_RS10635	ycjF	TIGR01620 family protein	1.60826	16.4422	4.4969e-18	3.61209e-17
SSON53G_RS04140	bioD	ATP-dependent dethiobiotin synthetase BioD	-2.50115	16.3879	5.10324e-18	4.09336e-17
SSON53G_RS31245	hypothetical protein	hypothetical protein	1.27369	16.3209	5.96358e-18	4.77673e-17
SSON53G_RS21925	selB	selenocysteinyl-tRNA-specific translation elongation factor SelB	-1.30177	16.3134	6.07603e-18	4.85998e-17
SSON53G_RS22400	phoU	phosphate-specific transport system accessory protein PhoU	-1.49813	16.2234	7.48533e-18	5.97883e-17
SSON53G_RS13850	fadL	long-chain fatty acid transporter FadL	1.51	16.0957	1.00587e-17	8.02303e-17
SSON53G_RS24485	nhaK	sodium:proton antiporter	-0.957694	16.0837	1.03535e-17	8.24664e-17
SSON53G_RS26395	hypothetical protein	hypothetical protein	-2.85464	16.008	1.23426e-17	9.81727e-17
SSON53G_RS09535	maeA	NAD-dependent malic enzyme	-0.955932	16.0043	1.24658e-17	9.90143e-17
SSON53G_RS01520		glutamate-5-semialdehyde dehydrogenase	-1.1918	16.0036	1.25034e-17	9.91748e-17
SSON53G_RS15875	ung	uracil-DNA glycosylase	-1.36723	15.9926	1.28426e-17	1.01724e-16
SSON53G_RS17410	galR	transcriptional regulator	-1.19367	15.9597	1.38733e-17	1.09735e-16
SSON53G_RS24180	pepE	peptidase E	-1.90828	15.9535	1.40908e-17	1.11302e-16
SSON53G_RS04120	bioA	adenosylmethionine--8-amino-7-oxononanoate aminotransferase BioA	-1.80793	15.9518	1.41665e-17	1.11745e-16
SSON53G_RS19255	rplU	50S ribosomal protein L21	1.28546	15.9407	1.45513e-17	1.14621e-16
SSON53G_RS20660		branched chain amino acid ABC transporter substrate-binding protein	1.81582	15.885	1.65658e-17	1.3031e-16
SSON53G_RS20440	glpE	thiosulfate sulfurtransferase	1.50763	15.8811	1.67407e-17	1.31504e-16
SSON53G_RS04160	moaA	cyclic pyranopterin monophosphate synthase	-1.598	15.8794	1.68274e-17	1.32003e-16
SSON53G_RS06910	yebA	murein DD-endopeptidase MepM	0.939453	15.8662	1.73699e-17	1.36072e-16
SSON53G_RS01010	skp	chaperone protein Skp	-1.01113	15.8525	1.79523e-17	1.40442e-16
SSON53G_RS16570		tRNA-Arg	1.69527	15.8342	1.87493e-17	1.46476e-16
SSON53G_RS23910		glutamate racemase	-1.26544	15.8275	1.90683e-17	1.48764e-16
SSON53G_RS05340	cspH	cold-shock protein CspH	2.88066	15.8231	1.92873e-17	1.50267e-16
SSON53G_RS32365	hypothetical protein	hypothetical protein	1.76639	15.802	2.02757e-17	1.57752e-16
SSON53G_RS12340		diguanylate cyclase	0.872769	15.7722	2.17482e-17	1.68978e-16
SSON53G_RS17555		sigma-54-dependent Fis family transcriptional regulator	1.23988	15.7391	2.35008e-17	1.82347e-16
SSON53G_RS25475	ridA	reactive intermediate/imine deaminase	-0.994848	15.6985	2.58362e-17	2.00196e-16
SSON53G_RS33140		IS1 family transposase	-1.37884	15.6476	2.90939e-17	2.25132e-16
SSON53G_RS18260	gsp_1	bifunctional glutathionylspermidine amidase/glutathionylspermidine synthase	-1.38513	15.5572	3.58707e-17	2.77196e-16
SSON53G_RS12410	yegQ	peptidase	1.24999	15.5376	3.7585e-17	2.90024e-16
SSON53G_RS22395	pstB	phosphate ABC transporter ATP-binding protein	-1.86071	15.5376	3.76325e-17	2.90024e-16
SSON53G_RS25425	mpl	UDP-N-acetylmuramate:L-alanyl-gamma-D-glutamyl- meso-diaminopimelate ligase	-1.00662	15.5073	4.0401e-17	3.10941e-16
SSON53G_RS18110	hypothetical protein	hypothetical protein	1.56898	15.5046	4.07056e-17	3.12862e-16
SSON53G_RS18865	yqjE	hypothetical protein	0.852709	15.4449	4.67759e-17	3.59035e-16
SSON53G_RS22750		uroporphyrinogen-III C-methyltransferase	-1.05034	15.4445	4.68765e-17	3.59324e-16
SSON53G_RS19385		glutamate synthase large subunit	0.901606	15.4382	4.76267e-17	3.64584e-16
SSON53G_RS26810	virB	Virulence regulon transcriptional activator VirB	-1.71315	15.3709	5.56891e-17	4.25731e-16
SSON53G_RS25410	ytfT	ABC transporter permease	2.26795	15.3658	5.64242e-17	4.30773e-16
SSON53G_RS02870	fepD	iron-enterobactin transporter membrane protein	1.2203	15.1755	8.75526e-17	6.6753e-16
SSON53G_RS02795	nfnB	oxygen-insensitive NAD(P)H nitroreductase	-1.24517	15.127	9.80297e-17	7.46413e-16
SSON53G_RS13105	ccmA	cytochrome c biogenesis protein CcmA	-1.8789	15.1003	1.04382e-16	7.93723e-16
SSON53G_RS04900	cmk	cytidylate kinase	0.798255	15.0853	1.08214e-16	8.21761e-16
SSON53G_RS26820		invasin	-1.75585	15.0424	1.19609e-16	9.07086e-16
SSON53G_RS01860	hemB	delta-aminolevulinic acid dehydratase	-0.902824	15.0349	1.2184e-16	9.22777e-16
SSON53G_RS25635	yjgB	aldehyde reductase Ahr	1.81445	15.0142	1.2795e-16	9.67773e-16
SSON53G_RS14980	rodZ	cytoskeleton protein RodZ	-0.820599	15.004	1.31165e-16	9.90773e-16
SSON53G_RS23770	metL	bifunctional aspartate kinase/homoserine dehydrogenase II	-0.981241	15.0035	1.31486e-16	9.91884e-16
SSON53G_RS05335	gfcA	hypothetical protein	-1.13258	14.9997	1.32843e-16	1.0008e-15
SSON53G_RS25360		DUF1107 domain-containing protein	1.1858	14.9881	1.366e-16	1.02774e-15
SSON53G_RS14485	ptsH	phosphocarrier protein HPr	-1.08852	14.9781	1.39978e-16	1.05177e-15
SSON53G_RS26405	hypothetical protein	hypothetical protein	-1.26638	14.9044	1.66091e-16	1.24634e-15
SSON53G_RS09785		DUF2526 domain-containing protein	-1.16231	14.8982	1.68694e-16	1.26421e-15
SSON53G_RS01070	rof	Rho-binding antiterminator	-1.07093	14.8898	1.72225e-16	1.28898e-15
SSON53G_RS02850	entF	enterobactin synthase subunit F	1.90413	14.8764	1.77835e-16	1.32922e-15
SSON53G_RS21355	hypothetical protein	hypothetical protein	1.9537	14.876	1.78244e-16	1.33053e-15
SSON53G_RS12730	fabG_3	SDR family oxidoreductase	1.90545	14.8234	2.01452e-16	1.5018e-15
SSON53G_RS01705	yahK	NAD(P)-dependent alcohol dehydrogenase	1.67584	14.8038	2.11272e-16	1.57119e-15
SSON53G_RS16755	hypA	protein HypA	-3.55275	14.8038	2.11311e-16	1.57119e-15
SSON53G_RS07815	gdhA	glutamate dehydrogenase	0.915764	14.7709	2.28248e-16	1.69492e-15
SSON53G_RS20090	crp	cAMP-activated global transcriptional regulator CRP	-1.085	14.756	2.36473e-16	1.75371e-15
SSON53G_RS08090		Hok/Gef family protein	-1.91918	14.751	2.39543e-16	1.77418e-15
SSON53G_RS19310	kdsD	arabinose 5-phosphate isomerase KdsD	-1.09299	14.7128	2.61927e-16	1.93744e-15
SSON53G_RS12695	yehY	ABC transporter permease	1.67349	14.6906	2.75979e-16	2.03874e-15
SSON53G_RS29975		murein transglycosylase	3.83434	14.6135	3.30027e-16	2.43486e-15
SSON53G_RS00895	yadR	iron-sulfur cluster insertion protein ErpA	0.697911	14.5734	3.62404e-16	2.67027e-15
SSON53G_RS04555		DUF1418 domain-containing protein	-2.10938	14.5213	4.09186e-16	3.01108e-15
SSON53G_RS19420	nanT	MFS transporter	-1.2943	14.4916	4.38726e-16	3.2243e-15
SSON53G_RS06985	eda	KHG/KDPG aldolase	-1.58656	14.4637	4.68609e-16	3.43794e-15
SSON53G_RS15790	lepA	elongation factor 4	0.720937	14.4637	4.69002e-16	3.43794e-15
SSON53G_RS26125	deoB	phosphopentomutase	1.07784	14.4517	4.82718e-16	3.53394e-15
SSON53G_RS26875	mxiG	protein MxiG	-1.78841	14.429	5.0929e-16	3.72369e-15
SSON53G_RS30235	hypothetical protein	hypothetical protein	-1.14058	14.3543	6.05662e-16	4.42265e-15
SSON53G_RS21435	iucC	IucA/IucC family siderophore biosynthesis protein	2.62424	14.3468	6.17012e-16	4.49977e-15
SSON53G_RS25975	yjjM	transcriptional regulator	-1.33779	14.3347	6.35226e-16	4.62668e-15
SSON53G_RS05685		SecY/SecA suppressor protein	2.41763	14.3328	6.38904e-16	4.64754e-15
SSON53G_RS21195		DUF3748 domain-containing protein	-1.41901	14.3279	6.47015e-16	4.70054e-15
SSON53G_RS18425	ygiW_1	TIGR00156 family protein	1.04168	14.2868	7.12042e-16	5.16638e-15
SSON53G_RS18790	alx	TerC family protein	1.46078	14.2567	7.65172e-16	5.53778e-15
SSON53G_RS04510	ybjG	undecaprenyl-diphosphate phosphatase	-1.62357	14.2567	7.64661e-16	5.53778e-15
SSON53G_RS11500	chaB	cation transport regulator ChaB	2.17578	14.2543	7.70401e-16	5.56856e-15
SSON53G_RS10820	fabI	enoyl-[acyl-carrier-protein] reductase FabI	-0.893127	14.2298	8.16084e-16	5.8913e-15
SSON53G_RS20700	yhhN	lysoplasmalogenase	-0.977331	14.1642	9.50407e-16	6.8523e-15
SSON53G_RS10925	topA	type I DNA topoisomerase	0.712298	14.1582	9.64667e-16	6.94633e-15
SSON53G_RS26350	hypothetical protein	hypothetical protein	-1.55102	14.1576	9.67208e-16	6.95585e-15
SSON53G_RS03915	queH	hypothetical protein	0.864672	14.1348	1.02077e-15	7.33181e-15
SSON53G_RS15750	yfhL	ferredoxin	1.85953	14.0853	1.14541e-15	8.21669e-15
SSON53G_RS03315	nagC	N-acetylglucosamine repressor	-1.04598	14.0017	1.39034e-15	9.96117e-15
SSON53G_RS09125	ydfG	NAD(P)-dependent oxidoreductase	-0.899826	13.9665	1.50948e-15	1.08012e-14
SSON53G_RS07280	yoaD	cyclic di-GMP phosphodiesterase	1.94056	13.9126	1.71222e-15	1.22291e-14
SSON53G_RS26105		YjjI family glycine radical enzyme	-3.36483	13.9126	1.71332e-15	1.22291e-14
SSON53G_RS21240		IS200/IS605 family transposase	-1.4196	13.9005	1.76386e-15	1.25741e-14
SSON53G_RS10740		4-aminobutyrate--2-oxoglutarate transaminase	1.8516	13.8878	1.81848e-15	1.29473e-14
SSON53G_RS13370	yfaY	competence/damage-inducible protein A	-1.10021	13.8798	1.85451e-15	1.31874e-14
SSON53G_RS23680	hslV	HslU--HslV peptidase proteolytic subunit	1.00422	13.847	2.00257e-15	1.42225e-14
SSON53G_RS09730	yncE_2	YncE family protein	1.78609	13.8111	2.17816e-15	1.54503e-14
SSON53G_RS29110	hypothetical protein	hypothetical protein	2.55332	13.7918	2.27977e-15	1.6151e-14
SSON53G_RS12135	yeeA	FUSC family protein	1.79366	13.7697	2.40192e-15	1.69952e-14
SSON53G_RS13670	hisM	histidine ABC transporter permease	1.1309	13.7551	2.48671e-15	1.75733e-14
SSON53G_RS16585	alaS	alanine--tRNA ligase	-0.690012	13.7465	2.53988e-15	1.79269e-14
SSON53G_RS08680	rnt	ribonuclease T	1.28661	13.6642	3.07371e-15	2.1668e-14
SSON53G_RS12830	cirA	TonB-dependent receptor	1.93413	13.653	3.15757e-15	2.22316e-14
SSON53G_RS11700	hypothetical protein	hypothetical protein	1.87912	13.5692	3.83479e-15	2.69664e-14
SSON53G_RS22670	rffG	dTDP-glucose 4,6-dehydratase	-1.1012	13.5542	3.97444e-15	2.79141e-14
SSON53G_RS17655	idi	isopentenyl-diphosphate Delta-isomerase	1.39911	13.5492	4.02482e-15	2.82332e-14
SSON53G_RS04740	clpS	ATP-dependent Clp protease adaptor ClpS	0.860279	13.5412	4.10505e-15	2.87606e-14
SSON53G_RS26195	robA	right origin-binding protein	-0.700253	13.5308	4.20986e-15	2.94587e-14
SSON53G_RS10735	pspF	phage shock protein operon transcriptional activator	-1.64012	13.5249	4.27256e-15	2.98608e-14
SSON53G_RS19785	fmt	methionyl-tRNA formyltransferase	-0.872967	13.5227	4.29922e-15	3.00104e-14
SSON53G_RS26855	hypothetical protein	hypothetical protein	-2.45934	13.5156	4.37556e-15	3.05059e-14
SSON53G_RS02545	ybbN	co-chaperone YbbN	0.944788	13.4765	4.79422e-15	3.33839e-14
SSON53G_RS32640		MFS transporter	1.42266	13.4629	4.95289e-15	3.44467e-14
SSON53G_RS20405	malT	HTH-type transcriptional regulator MalT	-1.12132	13.4626	4.96228e-15	3.447e-14
SSON53G_RS10090	hslJ	heat-shock protein HslJ	1.6812	13.4623	4.97169e-15	3.44934e-14
SSON53G_RS19100	yhbU	collagenase	-3.88225	13.4485	5.13859e-15	3.5608e-14
SSON53G_RS10615	ycjG	L-Ala-D/L-Glu epimerase	1.18466	13.4327	5.33462e-15	3.69215e-14
SSON53G_RS08700		DUF1289 domain-containing protein	1.44985	13.4259	5.4255e-15	3.7505e-14
SSON53G_RS13390		UDP-4-amino-4-deoxy-L-arabinose-oxoglutarate aminotransferase	1.60922	13.3728	6.13873e-15	4.2384e-14
SSON53G_RS02360	ylaC	hypothetical protein	1.51627	13.3587	6.34849e-15	4.37792e-14
SSON53G_RS10260		Hok/Gef family protein	-1.4494	13.3318	6.763e-15	4.65814e-14
SSON53G_RS07030	holE	DNA polymerase III subunit theta	2.13695	13.3252	6.87409e-15	4.72894e-14
SSON53G_RS18345	exbB	biopolymer transporter ExbB	1.23446	13.3143	7.05852e-15	4.84997e-14
SSON53G_RS13505	nuoN	NADH-quinone oxidoreductase subunit N	-0.950493	13.269	7.84241e-15	5.3821e-14
SSON53G_RS05950	fabF	beta-ketoacyl-[acyl-carrier-protein] synthase II	-0.877938	13.2605	8.00727e-15	5.48864e-14
SSON53G_RS26955	spaO	surface presentation of antigens protein SpaO	-2.30581	13.2438	8.33158e-15	5.70408e-14
SSON53G_RS24835		N-acetyltransferase	1.96034	13.2099	9.01954e-15	6.16768e-14
SSON53G_RS16055		hypothetical protein	0.856677	13.1855	9.55163e-15	6.5237e-14
SSON53G_RS24065	nfi	endonuclease V	-0.967221	13.1757	9.78126e-15	6.67255e-14
SSON53G_RS23255	fdhE	formate dehydrogenase accessory protein FdhE	-1.1585	13.1373	1.06996e-14	7.2903e-14
SSON53G_RS18695	ebgR	transcriptional regulator EbgR	-1.75032	13.13	1.08933e-14	7.41342e-14
SSON53G_RS08775	tppB	dipeptide and tripeptide permease A	0.825231	13.1157	1.1271e-14	7.66134e-14
SSON53G_RS05740	lpxL	lipid A biosynthesis lauroyltransferase	-0.9749	13.0709	1.25091e-14	8.49282e-14
SSON53G_RS15605	tonB	energy transducer TonB	2.37383	13.0135	1.42966e-14	9.69485e-14
SSON53G_RS08010	yniB	membrane protein	0.841539	12.9675	1.59109e-14	1.07767e-13
SSON53G_RS09275	dmsC2	dimethyl sulfoxide reductase anchor subunit	1.06594	12.9558	1.63635e-14	1.10701e-13
SSON53G_RS07010	yebE	DUF533 domain-containing protein	1.30005	12.9225	1.7692e-14	1.19547e-13
SSON53G_RS02435	recR	recombination protein RecR	-0.760878	12.9114	1.81692e-14	1.22626e-13
SSON53G_RS16560		tRNA-Arg	1.73961	12.8935	1.89561e-14	1.27786e-13
SSON53G_RS21765	tdh	L-threonine 3-dehydrogenase	-1.08466	12.8885	1.9197e-14	1.29256e-13
SSON53G_RS16320	dnaB_2	replicative DNA helicase	1.32213	12.8577	2.06341e-14	1.38769e-13
SSON53G_RS00685	gcd	membrane-bound PQQ-dependent dehydrogenase, glucose/quinate/shikimate family	1.00307	12.7972	2.3746e-14	1.5951e-13
SSON53G_RS23120	polA	DNA polymerase I	-1.1017	12.7964	2.38206e-14	1.59822e-13
SSON53G_RS26815		acyl carrier protein	-1.81401	12.792	2.40908e-14	1.61445e-13
SSON53G_RS00425	leuB	3-isopropylmalate dehydrogenase	1.65843	12.7033	2.95806e-14	1.98003e-13
SSON53G_RS10770	puuP	putrescine importer PuuP	1.57943	12.6897	3.0556e-14	2.04292e-13
SSON53G_RS06470		DUF2492 domain-containing protein	1.35085	12.679	3.13616e-14	2.09432e-13
SSON53G_RS07210	mgrB	PhoP regulon feedback inhibition membrane protein MgrB	-1.83546	12.6601	3.27923e-14	2.1873e-13
SSON53G_RS32395	hypothetical protein	hypothetical protein	-2.54559	12.6449	3.40009e-14	2.26527e-13
SSON53G_RS15820		FAD-binding protein	4.61991	12.6019	3.75848e-14	2.50112e-13
SSON53G_RS27285		DUF535 domain-containing protein	-1.11542	12.5857	3.90585e-14	2.59616e-13
SSON53G_RS21920	selA	L-selenocysteinyl-tRNA(Sec) synthase	-1.20928	12.5777	3.98324e-14	2.64452e-13
SSON53G_RS06535	yecG	universal stress protein UspC	-1.27416	12.5705	4.05428e-14	2.68855e-13
SSON53G_RS24425	tyrB	aromatic amino acid transaminase	-0.98901	12.5372	4.38188e-14	2.90242e-13
SSON53G_RS18265	yghU	thiol:disulfide oxidoreductase	0.991467	12.5339	4.42047e-14	2.92459e-13
SSON53G_RS13000	yejL	hypothetical protein	1.06909	12.5005	4.77931e-14	3.15833e-13
SSON53G_RS11420		patatin family protein	1.41599	12.4968	4.82637e-14	3.18574e-13
SSON53G_RS16515	ygaH	L-valine transporter subunit YgaH	-1.77889	12.494	4.86263e-14	3.20596e-13
SSON53G_RS07645	hypothetical protein	hypothetical protein	2.25013	12.4078	5.94457e-14	3.91025e-13
SSON53G_RS22630	trxA	thiol reductase thioredoxin	-1.16935	12.4078	5.93942e-14	3.91025e-13
SSON53G_RS05555		tRNA-Ser	-2.4387	12.399	6.07289e-14	3.99006e-13
SSON53G_RS13605	yfbV	DUF412 domain-containing protein	0.982126	12.3346	7.05146e-14	4.62767e-13
SSON53G_RS25190		isovaleryl-CoA dehydrogenase	1.61261	12.3095	7.47999e-14	4.90326e-13
SSON53G_RS04270	ybiI_1	DksA/TraR family C4-type zinc finger protein	1.74609	12.3057	7.55473e-14	4.94657e-13
SSON53G_RS28550	hypothetical protein	hypothetical protein	1.00515	12.2706	8.20021e-14	5.36305e-13
SSON53G_RS25130	hfq	RNA-binding protein Hfq	-0.837198	12.2685	8.24904e-14	5.3888e-13
SSON53G_RS21535		DUF4102 domain-containing protein	-1.77828	12.2671	8.28464e-14	5.40587e-13
SSON53G_RS02045	queA	tRNA preQ1(34) S-adenosylmethionine ribosyltransferase-isomerase QueA	1.03341	12.2227	9.18767e-14	5.98826e-13
SSON53G_RS02240	tig	trigger factor	-0.783103	12.2171	9.31808e-14	6.06633e-13
SSON53G_RS31035		terminase	-1.92523	12.2086	9.51316e-14	6.18626e-13
SSON53G_RS13620	pta	phosphate acetyltransferase	-1.09855	12.1846	1.00651e-13	6.53775e-13
SSON53G_RS19910	rpmC	50S ribosomal protein L29	-0.644995	12.17	1.04208e-13	6.76107e-13
SSON53G_RS20650	yhhK	aspartate 1-decarboxylase autocleavage activator PanM	-1.51603	12.136	1.12825e-13	7.31181e-13
SSON53G_RS23895	yijD	hypothetical protein	-1.08321	12.109	1.20184e-13	7.77989e-13
SSON53G_RS22295	atpH	ATP synthase subunit delta	-0.912519	12.0865	1.26728e-13	8.1942e-13
SSON53G_RS24530	nrfA	ammonia-forming cytochrome c nitrite reductase subunit c552	-2.39058	12.0839	1.27617e-13	8.24237e-13
SSON53G_RS05815		gfo/Idh/MocA family oxidoreductase	-1.07153	12.054	1.36871e-13	8.83004e-13
SSON53G_RS19220	rrmJ	23S rRNA (uridine(2552)-2'-O)-methyltransferase	0.61489	12.0174	1.49074e-13	9.60643e-13
SSON53G_RS21875	yibI	DUF3302 domain-containing protein	2.5875	11.9805	1.62489e-13	1.04591e-12
SSON53G_RS10920	cysB	LysR family transcriptional regulator CysB	-1.00212	11.963	1.6937e-13	1.08897e-12
SSON53G_RS05405	cbpM	chaperone modulatory protein CbpM	0.994521	11.9161	1.88884e-13	1.21307e-12
SSON53G_RS16610		murein transglycosylase	1.26222	11.8456	2.22451e-13	1.42704e-12
SSON53G_RS25435	pmbA	metalloprotease PmbA	-0.70453	11.8262	2.32829e-13	1.49194e-12
SSON53G_RS00930	degP	periplasmic serine endoprotease DegP	0.68302	11.8022	2.46346e-13	1.57678e-12
SSON53G_RS25135	hflX	GTPase HflX	0.712919	11.7828	2.579e-13	1.64888e-12
SSON53G_RS20725	yhhS	MFS transporter	-1.38545	11.7674	2.67544e-13	1.70863e-12
SSON53G_RS23975	tuf2	translation elongation factor EF-Tu 2	-0.663502	11.7633	2.70336e-13	1.72453e-12
SSON53G_RS08620	mdtK	multidrug transporter MdtK	1.05668	11.7624	2.71191e-13	1.72805e-12
SSON53G_RS01210		tRNA-Asp	-1.78008	11.7615	2.72096e-13	1.73188e-12
SSON53G_RS10230		tRNA-Met	0.940166	11.7457	2.82478e-13	1.79596e-12
SSON53G_RS26940		FliI/YscN family ATPase	-1.8189	11.7166	3.02403e-13	1.9205e-12
SSON53G_RS04430	moeA	molybdopterin molybdotransferase	-1.12812	11.7065	3.09825e-13	1.96544e-12
SSON53G_RS22460	rbsC	ribose ABC transporter permease	-0.790966	11.6808	3.29073e-13	2.08523e-12
SSON53G_RS16495	proW	proline/glycine betaine ABC transporter permease ProW	-1.42693	11.6744	3.34368e-13	2.11642e-12
SSON53G_RS02880	fepB	Fe2+-enterobactin ABC transporter substrate-binding protein	1.24456	11.6537	3.51051e-13	2.21956e-12
SSON53G_RS27625	hypothetical protein	hypothetical protein	-1.04501	11.6348	3.67062e-13	2.31822e-12
SSON53G_RS22240	yhjE	MFS transporter	1.39588	11.607	3.91831e-13	2.47192e-12
SSON53G_RS04960		protein kinase-like domain protein	-1.15845	11.5636	4.33427e-13	2.73131e-12
SSON53G_RS09435	betC	sulfatase	1.59412	11.5507	4.46993e-13	2.81369e-12
SSON53G_RS01015	lpxD	UDP-3-O-(3-hydroxymyristoyl)glucosamine N-acyltransferase	-0.999644	11.5387	4.6008e-13	2.89287e-12
SSON53G_RS25420	fbp	fructose 1,6-bisphosphatase	-0.893164	11.5366	4.62754e-13	2.90648e-12
SSON53G_RS14775	gcvR	glycine cleavage system transcriptional repressor	-1.05804	11.5241	4.76843e-13	2.99168e-12
SSON53G_RS04600	ybjO	hypothetical protein	1.51541	11.517	4.85189e-13	3.04069e-12
SSON53G_RS13720	dedA	DedA family protein	0.840598	11.4676	5.44261e-13	3.40716e-12
SSON53G_RS18870		hypothetical protein	0.615515	11.4411	5.79096e-13	3.62125e-12
SSON53G_RS14375		DUF2502 domain-containing protein	1.33853	11.3989	6.38895e-13	3.99082e-12
SSON53G_RS21650		dUTP diphosphatase	-0.98541	11.3845	6.61204e-13	4.12565e-12
SSON53G_RS32390		glycosyl transferase	1.65578	11.3786	6.70925e-13	4.18173e-12
SSON53G_RS19820	rplQ	50S ribosomal protein L17	-1.01385	11.372	6.82065e-13	4.24652e-12
SSON53G_RS21365	nlpA	lipoprotein NlpA	-1.41486	11.3579	7.05215e-13	4.38587e-12
SSON53G_RS24135	metA	homoserine O-succinyltransferase	1.60044	11.3375	7.39933e-13	4.59677e-12
SSON53G_RS03750	galM_2	galactose-1-epimerase	-1.35249	11.3269	7.59181e-13	4.71122e-12
SSON53G_RS17415	lysA	diaminopimelate decarboxylase	1.34568	11.3162	7.78844e-13	4.82799e-12
SSON53G_RS13665	hisP	histidine transport ATP-binding protein HisP	1.24877	11.3149	7.82096e-13	4.84288e-12
SSON53G_RS16600	recA	DNA recombination/repair protein RecA	-0.88671	11.311	7.89926e-13	4.88606e-12
SSON53G_RS20520	asd	aspartate-semialdehyde dehydrogenase	-0.710143	11.3075	7.97262e-13	4.9261e-12
SSON53G_RS01500	frsA	esterase	-1.02602	11.3055	8.01746e-13	4.94844e-12
SSON53G_RS06070	ycfX	N-acetyl-D-glucosamine kinase	-1.06232	11.2881	8.35451e-13	5.15089e-12
SSON53G_RS27495		Vi polysaccharide biosynthesis UDP-N-acetylglucosamine C-6 dehydrogenase TviB	-0.707649	11.2851	8.42106e-13	5.18632e-12
SSON53G_RS18475	tolC	outer membrane protein TolC	-0.786897	11.2837	8.4572e-13	5.20295e-12
SSON53G_RS05360		cold-shock protein	-2.02684	11.2711	8.71668e-13	5.35682e-12
SSON53G_RS07330	slp_1	membrane protein	0.916981	11.264	8.86951e-13	5.44487e-12
SSON53G_RS31595		glycosyl transferase	2.42661	11.2313	9.57479e-13	5.87151e-12
SSON53G_RS17755	ygfB	YecA family protein	-0.997207	11.2266	9.68741e-13	5.93419e-12
SSON53G_RS26825		IpaD/SipD/SspD family type III secretion system needle tip protein	-1.62161	11.1592	1.13267e-12	6.93091e-12
SSON53G_RS20830	uspB	universal stress protein B	1.61532	11.1588	1.13483e-12	6.93669e-12
SSON53G_RS09770		NADP-dependent oxidoreductase	1.60463	11.1419	1.18117e-12	7.21221e-12
SSON53G_RS13120	napH	quinol dehydrogenase ferredoxin subunit NapH	-2.55428	11.1028	1.29404e-12	7.89293e-12
SSON53G_RS07775	sppA	signal peptide peptidase SppA	-0.818548	11.1004	1.30241e-12	7.93551e-12
SSON53G_RS02980	rnk	nucleoside diphosphate kinase regulator	-1.08736	11.0985	1.30962e-12	7.97095e-12
SSON53G_RS02785	pheP	phenylalanine-specific permease	0.80582	11.0942	1.32417e-12	8.05087e-12
SSON53G_RS25760	fimB	tyrosine recombinase	-1.54996	11.0613	1.42979e-12	8.6838e-12
SSON53G_RS23650	glpK	glycerol kinase	0.91728	11.06	1.43554e-12	8.70946e-12
SSON53G_RS02145	thiJ	protein deglycase YajL	-1.47824	11.0583	1.44289e-12	8.74474e-12
SSON53G_RS15760	acpS	holo-ACP synthase	-1.32957	11.0296	1.54293e-12	9.34113e-12
SSON53G_RS25695	fecR	fec operon regulator FecR	1.09786	11.0104	1.61433e-12	9.76301e-12
SSON53G_RS02095	ribD	bifunctional diaminohydroxyphosphoribosylaminopyrimidine deaminase/5-amino-6-(5-phosphoribosylamino)uracil reductase RibD	-1.03031	10.9989	1.6598e-12	1.00245e-11
SSON53G_RS14415	yfeD_2	helix-turn-helix domain-containing protein	-1.056	10.9989	1.66108e-12	1.00245e-11
SSON53G_RS13545	nuoF	NADH-quinone oxidoreductase subunit NuoF	-1.10746	10.9908	1.69447e-12	1.02152e-11
SSON53G_RS20590		DUF2756 domain-containing protein	0.92981	10.9751	1.75847e-12	1.05898e-11
SSON53G_RS12165	yeeF	low-affinity putrescine importer PlaP	0.909587	10.9494	1.86748e-12	1.12344e-11
SSON53G_RS13675	hisQ	histidine ABC transporter permease	1.18945	10.9394	1.91336e-12	1.14983e-11
SSON53G_RS24090	zraS	two-component system sensor histidine kinase ZraS	-2.19157	10.9331	1.94332e-12	1.16661e-11
SSON53G_RS20500	glgA	glycogen synthase	1.08356	10.9209	2.00089e-12	1.1999e-11
SSON53G_RS20325	envZ	two-component sensor histidine kinase	-0.997656	10.9098	2.05473e-12	1.23089e-11
SSON53G_RS09960	hokB	protein HokB	1.35809	10.8952	2.12726e-12	1.27301e-11
SSON53G_RS00250	caiA	crotonobetainyl-CoA dehydrogenase	-1.72529	10.8808	2.20105e-12	1.31579e-11
SSON53G_RS24840		antitoxin	-3.74534	10.8638	2.29138e-12	1.36835e-11
SSON53G_RS23915		16S ribosomal RNA	1.43803	10.8593	2.31795e-12	1.38277e-11
SSON53G_RS20095	yccS_1	membrane protein	-0.782667	10.8417	2.41631e-12	1.43994e-11
SSON53G_RS10930	hypothetical protein	hypothetical protein	1.21293	10.8361	2.44978e-12	1.45836e-11
SSON53G_RS00730	panC	pantoate--beta-alanine ligase	-0.925285	10.8144	2.57825e-12	1.53324e-11
SSON53G_RS20705	zntA	zinc/cadmium/mercury/lead-transporting ATPase	-0.923393	10.8064	2.62894e-12	1.56176e-11
SSON53G_RS10355	hypothetical protein	hypothetical protein	-1.12538	10.7926	2.71661e-12	1.61215e-11
SSON53G_RS09920	ydcK	acetyltransferase	1.32495	10.737	3.0908e-12	1.83231e-11
SSON53G_RS01810	adhC	S-(hydroxymethyl)glutathione dehydrogenase	-1.06208	10.7209	3.21119e-12	1.90171e-11
SSON53G_RS11950	cbl	CysB family transcriptional regulator	-1.30759	10.7132	3.27186e-12	1.93562e-11
SSON53G_RS09360	tqsA	AI-2 transporter TqsA	-1.96707	10.6961	3.40644e-12	2.01315e-11
SSON53G_RS03950		DDE domain-containing protein	1.18156	10.6704	3.61784e-12	2.13587e-11
SSON53G_RS04935	msbA	lipid A export ATP-binding/permease MsbA	0.673932	10.6675	3.64582e-12	2.15017e-11
SSON53G_RS00445	ilvI	acetolactate synthase 3 large subunit	1.46427	10.6629	3.68892e-12	2.17334e-11
SSON53G_RS04235	ybiH	transcriptional regulator	-1.28516	10.6533	3.7751e-12	2.22182e-11
SSON53G_RS30350	hypothetical protein	hypothetical protein	1.82207	10.6446	3.85553e-12	2.26681e-11
SSON53G_RS13155	mqo	malate:quinone oxidoreductase	-1.38298	10.6372	3.92599e-12	2.30586e-11
SSON53G_RS07025		carbon-nitrogen hydrolase family protein	1.0727	10.6283	4.01102e-12	2.35338e-11
SSON53G_RS02155	yajQ	nucleotide-binding protein	-0.95691	10.6174	4.1168e-12	2.41296e-11
SSON53G_RS20335	greB	transcription elongation factor GreB	-1.28597	10.5544	4.76493e-12	2.78998e-11
SSON53G_RS22745	hemY	heme biosynthesis protein HemY	-0.78621	10.5379	4.95398e-12	2.8977e-11
SSON53G_RS22020	tkrA	bifunctional glyoxylate/hydroxypyruvate reductase B	-0.820776	10.5116	5.26869e-12	3.07862e-11
SSON53G_RS00165	lspA	lipoprotein signal peptidase	-0.848005	10.4946	5.48506e-12	3.20177e-11
SSON53G_RS17345	ptsP	phosphoenolpyruvate-protein phosphotransferase PtsP	-0.704852	10.4564	5.99608e-12	3.49649e-11
SSON53G_RS20030	fkpA	FKBP-type peptidyl-prolyl cis-trans isomerase	-0.748723	10.435	6.30474e-12	3.67272e-11
SSON53G_RS04340	rhtA	threonine/homoserine exporter RhtA	1.35289	10.4227	6.49213e-12	3.77802e-11
SSON53G_RS07750	gapA	aldehyde dehydrogenase	-0.58382	10.4219	6.51161e-12	3.78549e-11
SSON53G_RS21135	gyrB	DNA gyrase subunit B	-0.653546	10.4068	6.74903e-12	3.91952e-11
SSON53G_RS14200		DDE domain-containing protein	1.15639	10.3991	6.87582e-12	3.98909e-11
SSON53G_RS10745	puuB	FAD-binding oxidoreductase	1.78025	10.3822	7.15717e-12	4.1481e-11
SSON53G_RS10760	puuD	gamma-glutamyl-gamma-aminobutyrate hydrolase	1.53427	10.374	7.29954e-12	4.22632e-11
SSON53G_RS17250	csdA_1	cysteine desulfurase CsdA	-0.957151	10.373	7.32374e-12	4.23603e-11
SSON53G_RS02265	ppiD	peptidyl-prolyl cis-trans isomerase	-0.747797	10.3721	7.34766e-12	4.24556e-11
SSON53G_RS08550	lpp_2	murein lipoprotein	-1.10674	10.3605	7.55301e-12	4.3598e-11
SSON53G_RS23925		23S ribosomal RNA	1.08292	10.353	7.69292e-12	4.43607e-11
SSON53G_RS04125	bioB	biotin synthase	-1.90291	10.348	7.78993e-12	4.48747e-11
SSON53G_RS09390	ydgC	hypothetical protein	1.21962	10.3461	7.83108e-12	4.50662e-11
SSON53G_RS19810	zntR	heavy metal-responsive transcriptional regulator	1.16484	10.3424	7.90685e-12	4.54564e-11
SSON53G_RS04750		tRNA-Ser	-2.26634	10.2974	8.77892e-12	5.04191e-11
SSON53G_RS02970		glutathione-dependent formaldehyde dehydrogenase	1.80464	10.2946	8.84552e-12	5.07505e-11
SSON53G_RS26960		EscR/YscR/HrcR family type III secretion system export apparatus protein	-2.09544	10.2803	9.15057e-12	5.24479e-11
SSON53G_RS02065	secF	protein translocase subunit SecF	-0.806089	10.2527	9.76123e-12	5.58919e-11
SSON53G_RS21120	dnaA	chromosomal replication initiator protein DnaA	0.65818	10.2476	9.88645e-12	5.65521e-11
SSON53G_RS21460	hypothetical protein	hypothetical protein	1.8254	10.247	9.9082e-12	5.66197e-11
SSON53G_RS18460	icc	phosphodiesterase	-0.749342	10.2205	1.05426e-11	6.01845e-11
SSON53G_RS22795	yfnB	flavin mononucleotide phosphatase YigB	-1.23458	10.2194	1.05809e-11	6.03426e-11
SSON53G_RS19250	rpmA	50S ribosomal protein L27	0.724309	10.202	1.1023e-11	6.28015e-11
SSON53G_RS14555		PTS N-acetylmuramic acid transporter subunits IIBC	-1.4264	10.1678	1.19376e-11	6.79441e-11
SSON53G_RS15220		invasion protein	0.993079	10.1675	1.196e-11	6.80041e-11
SSON53G_RS12325	asmA	outer membrane assembly protein AsmA	-0.686274	10.1652	1.20335e-11	6.83535e-11
SSON53G_RS26870	ipgF	protein IpgF	-2.38845	10.1608	1.21687e-11	6.90527e-11
SSON53G_RS22665	wecC	UDP-N-acetyl-D-mannosamine dehydrogenase	-0.811502	10.1602	1.21973e-11	6.91461e-11
SSON53G_RS16520	mprA	transcriptional regulator	-0.989958	10.1493	1.25209e-11	7.09105e-11
SSON53G_RS02840	fes	enterochelin esterase	1.75787	10.1071	1.38135e-11	7.81531e-11
SSON53G_RS02505	copA	copper-exporting P-type ATPase CopA	1.00767	10.098	1.41201e-11	7.98086e-11
SSON53G_RS12175	yeeZ	NAD(P)-dependent oxidoreductase	-0.656202	10.0853	1.45521e-11	8.21689e-11
SSON53G_RS09285	clcB	voltage-gated ClC-type chloride channel ClcB	1.44996	10.0523	1.57163e-11	8.86549e-11
SSON53G_RS00305	apaH	diadenosine tetraphosphatase	0.925996	10.0443	1.60249e-11	9.03064e-11
SSON53G_RS25580	valS	valine--tRNA ligase	-0.570354	10.042	1.61264e-11	9.07886e-11
SSON53G_RS03425	kdpB	potassium-transporting ATPase subunit B	1.97604	10.0217	1.69142e-11	9.51296e-11
SSON53G_RS25870		penicillin G acylase	1.48786	9.98903	1.82528e-11	1.02557e-10
SSON53G_RS03675		tRNA-Lys	1.12487	9.97704	1.87824e-11	1.05429e-10
SSON53G_RS09805	patD	gamma-aminobutyraldehyde dehydrogenase	1.6758	9.94468	2.02551e-11	1.13584e-10
SSON53G_RS08995		serine/threonine protein kinase	1.60231	9.9337	2.07941e-11	1.16492e-10
SSON53G_RS11495		transporter	0.958812	9.93263	2.08661e-11	1.1678e-10
SSON53G_RS23135	hemN_1	coproporphyrinogen III oxidase	-0.800685	9.92905	2.10595e-11	1.17747e-10
SSON53G_RS22685	wecE	dTDP-4-amino-4,6-dideoxygalactose transaminase	-1.02079	9.92078	2.14855e-11	1.20012e-10
SSON53G_RS29855	hypothetical protein	hypothetical protein	3.2991	9.91284	2.1903e-11	1.22224e-10
SSON53G_RS19450	rpsI	30S ribosomal protein S9	-0.900704	9.89974	2.25961e-11	1.25968e-10
SSON53G_RS03635	ybgE	cyd operon protein YbgE	-0.753177	9.88648	2.33191e-11	1.29872e-10
SSON53G_RS13125	napG	ferredoxin-type protein NapG	-3.79013	9.88325	2.35165e-11	1.30843e-10
SSON53G_RS23175	glpR_3	DeoR/GlpR transcriptional regulator	-1.13828	9.86743	2.44124e-11	1.35696e-10
SSON53G_RS07665		DDE domain-containing protein	1.13717	9.85233	2.53011e-11	1.40499e-10
SSON53G_RS16280		tRNA-Gly	-0.870428	9.8386	2.61393e-11	1.45012e-10
SSON53G_RS22775		membrane protein	-1.52346	9.83315	2.64948e-11	1.46841e-10
SSON53G_RS17460	hypothetical protein	hypothetical protein	-1.66718	9.82278	2.71616e-11	1.50391e-10
SSON53G_RS09845		DUF2554 domain-containing protein	2.06048	9.81436	2.77202e-11	1.53335e-10
SSON53G_RS17190	xni	flap endonuclease Xni	-1.05924	9.81211	2.78911e-11	1.54131e-10
SSON53G_RS18575	glnE	bifunctional [glutamate--ammonia ligase]-adenylyl-L-tyrosine phosphorylase/[glutamate--ammonia-ligase] adenylyltransferase	-0.946675	9.78617	2.96362e-11	1.63616e-10
SSON53G_RS24715	proP_1	proline/betaine transporter	-0.812872	9.78365	2.98596e-11	1.64569e-10
SSON53G_RS23305	frvA	fructose-like phosphotransferase enzyme IIA component	-1.1809	9.78365	2.98666e-11	1.64569e-10
SSON53G_RS26915	mxiE	transcriptional regulator MxiE	-2.72432	9.77429	3.05472e-11	1.68157e-10
SSON53G_RS02620	purE	5-(carboxyamino)imidazole ribonucleotide mutase	-1.3185	9.76992	3.08853e-11	1.69854e-10
SSON53G_RS22960	ubiE	ubiquinone/menaquinone biosynthesis C-methyltransferase UbiE	-0.815198	9.75263	3.21706e-11	1.76753e-10
SSON53G_RS00300	folA	dihydrofolate reductase	1.01984	9.73636	3.3431e-11	1.83501e-10
SSON53G_RS24170	metH	methionine synthase	-0.876225	9.73185	3.38124e-11	1.85415e-10
SSON53G_RS04715	ybjD	ATP-dependent endonuclease	-0.861927	9.72714	3.42141e-11	1.87438e-10
SSON53G_RS22570	ilvE	branched-chain-amino-acid transaminase	-1.00775	9.72336	3.45468e-11	1.89079e-10
SSON53G_RS04230	macA_1	secretion protein HlyD	-1.23371	9.70169	3.63487e-11	1.98751e-10
SSON53G_RS25440	cybC	soluble cytochrome b562	-1.15107	9.68125	3.81727e-11	2.08328e-10
SSON53G_RS03760	galT	galactose-1-phosphate uridylyltransferase	-1.75174	9.68125	3.81733e-11	2.08328e-10
SSON53G_RS09515		peptide ABC transporter ATP-binding protein	2.01207	9.67544	3.87249e-11	2.11136e-10
SSON53G_RS01160		tRNA-Asp	-1.55537	9.67396	3.88939e-11	2.11855e-10
SSON53G_RS02965	uspG	universal stress protein G	-0.945485	9.65143	4.1004e-11	2.23135e-10
SSON53G_RS11650		transposase	-0.872405	9.64884	4.12886e-11	2.2447e-10
SSON53G_RS14765	nlpB	outer membrane protein assembly factor BamC	-0.742939	9.63798	4.23751e-11	2.30157e-10
SSON53G_RS02300	sgrR	hypothetical protein	-1.09503	9.6032	4.59516e-11	2.49345e-10
SSON53G_RS03210	gltK	glutamate ABC transporter permease	0.862487	9.60261	4.60577e-11	2.49683e-10
SSON53G_RS17940	metK	S-adenosylmethionine synthase	0.79929	9.59752	4.66445e-11	2.52624e-10
SSON53G_RS26900		type III secretion system protein MxiN	-2.0396	9.5679	4.99842e-11	2.70455e-10
SSON53G_RS25010	sugE	quaternary ammonium compound-resistance protein SugE	1.02819	9.55496	5.15458e-11	2.7864e-10
SSON53G_RS19260	ispB	octaprenyl-diphosphate synthase	-1.12128	9.55282	5.18495e-11	2.80017e-10
SSON53G_RS15795	rseC	SoxR reducing system protein RseC	0.769139	9.53209	5.4435e-11	2.93702e-10
SSON53G_RS10265	hypothetical protein	hypothetical protein	1.22033	9.51588	5.65587e-11	3.04872e-10
SSON53G_RS08615	flu_1	hypothetical protein	1.52001	9.50831	5.76079e-11	3.10234e-10
SSON53G_RS24755	melR	transcriptional regulator MelR	-1.22084	9.46747	6.33473e-11	3.4082e-10
SSON53G_RS20670	ftsX	ABC transporter permease	-0.705923	9.44969	6.60579e-11	3.55069e-10
SSON53G_RS27425		type II toxin-antitoxin system RelE/ParE family toxin	-1.02645	9.42948	6.92688e-11	3.71977e-10
SSON53G_RS24325	malM	maltose operon protein MalM	-1.0919	9.41695	7.13642e-11	3.82869e-10
SSON53G_RS09440		anaerobic sulfatase maturase	2.43336	9.38778	7.63938e-11	4.09468e-10
SSON53G_RS26935	spaK	surface presentation of antigens protein SpaK	-1.47638	9.37297	7.91187e-11	4.23675e-10
SSON53G_RS22500		23S ribosomal RNA	0.954714	9.3508	8.33392e-11	4.45857e-10
SSON53G_RS26860	ipgD	inositol phosphate phosphatase IpgD	-1.2637	9.34391	8.4753e-11	4.52995e-10
SSON53G_RS18180	pet	autotransporter outer membrane beta-barrel domain-containing protein	-0.698284	9.33993	8.56135e-11	4.57167e-10
SSON53G_RS11525		3-deoxy-8-phosphooctulonate synthase	-0.824323	9.33648	8.63758e-11	4.60806e-10
SSON53G_RS07190	htpX	protease HtpX	0.842135	9.29467	9.51941e-11	5.07375e-10
SSON53G_RS25365	ytfL	HlyC/CorC family transporter	0.806033	9.29345	9.55518e-11	5.08807e-10
SSON53G_RS14365	glk	glucokinase	-0.900615	9.26171	1.02891e-10	5.47376e-10
SSON53G_RS18615	ttdR	transcriptional activator TtdR	-3.90074	9.23229	1.10206e-10	5.85745e-10
SSON53G_RS00825	pcnB	polynucleotide adenylyltransferase PcnB	0.78016	9.21342	1.15206e-10	6.11751e-10
SSON53G_RS04765	cudC	cysteine/glutathione ABC transporter ATP-binding protein/permease CydC	-0.864811	9.20599	1.17306e-10	6.2232e-10
SSON53G_RS25505	fabG1	NAD(P)-dependent oxidoreductase	-1.60946	9.20247	1.1837e-10	6.27383e-10
SSON53G_RS14475	cysZ	sulfate transporter CysZ	1.09921	9.19511	1.20504e-10	6.38099e-10
SSON53G_RS20860	gor	glutathione-disulfide reductase	-0.749684	9.15914	1.31031e-10	6.93201e-10
SSON53G_RS19150	rbfA	ribosome-binding factor A	-0.909508	9.14649	1.35031e-10	7.13697e-10
SSON53G_RS04975	mukF	chromosome partition protein MukF	-0.998076	9.14076	1.3695e-10	7.23174e-10
SSON53G_RS13110	napC	cytochrome c-type protein NapC	-2.08773	9.11442	1.45647e-10	7.68385e-10
SSON53G_RS23055		23S ribosomal RNA	1.03506	9.11433	1.45812e-10	7.68548e-10
SSON53G_RS00975	pyrH	UMP kinase	-0.810725	9.07312	1.60475e-10	8.45048e-10
SSON53G_RS27875	rprA	antisense sRNA RprA	1.47614	9.0613	1.65056e-10	8.6837e-10
SSON53G_RS01950	aroL	shikimate kinase	-1.19338	9.03609	1.75079e-10	9.20251e-10
SSON53G_RS14625	eutH	ethanolamine utilization protein EutH	2.02442	9.01315	1.84867e-10	9.70164e-10
SSON53G_RS08005	yniC	2-deoxyglucose-6-phosphate phosphatase	-1.00907	9.01315	1.84915e-10	9.70164e-10
SSON53G_RS18840	exuR	GntR family transcriptional regulator	-0.761528	9.00042	1.90594e-10	9.99045e-10
SSON53G_RS20330	ompR	DNA-binding response regulator	-0.843887	8.97016	2.04534e-10	1.07113e-09
SSON53G_RS26970	spaR	EscT/YscT/HrcT family type III secretion system export apparatus protein	-1.93841	8.96526	2.07043e-10	1.08327e-09
SSON53G_RS32040		glycosyl transferase	1.56049	8.95595	2.11725e-10	1.10675e-09
SSON53G_RS26840		CesD/SycD/LcrH family type III secretion system chaperone	-2.22006	8.95495	2.12406e-10	1.10929e-09
SSON53G_RS01805	frmB	S-formylglutathione hydrolase FrmB	-1.1368	8.94138	2.19348e-10	1.1445e-09
SSON53G_RS22305	atpE	ATP synthase subunit C	-0.57709	8.93369	2.23474e-10	1.16496e-09
SSON53G_RS17310	recC	exodeoxyribonuclease V subunit gamma	-0.802683	8.93179	2.24657e-10	1.17006e-09
SSON53G_RS25060	yjeM	glutamate/gamma-aminobutyrate family transporter YjeM	1.06215	8.91049	2.36168e-10	1.22889e-09
SSON53G_RS18510	ribB	3,4-dihydroxy-2-butanone-4-phosphate synthase	0.928689	8.90647	2.38579e-10	1.24031e-09
SSON53G_RS26065	rimI	ribosomal-protein-alanine N-acetyltransferase	1.14669	8.9035	2.40436e-10	1.24882e-09
SSON53G_RS28555	hypothetical protein	hypothetical protein	2.48242	8.88341	2.52046e-10	1.30793e-09
SSON53G_RS03660	tolB	protein TolB	-0.528254	8.88114	2.536e-10	1.3148e-09
SSON53G_RS03205	artP	glutamate/aspartate transport ATP-binding protein GltL	0.847416	8.88049	2.54212e-10	1.31677e-09
SSON53G_RS15810	rpoE	ECF RNA polymerase sigma-E factor	0.547796	8.87412	2.58202e-10	1.33623e-09
SSON53G_RS23385	xerD_2	integrase	-1.4359	8.86832	2.61913e-10	1.3542e-09
SSON53G_RS18610	plsY	glycerol-3-phosphate acyltransferase	0.902631	8.86565	2.63762e-10	1.36253e-09
SSON53G_RS27940		6S RNA	-3.12244	8.8554	2.70305e-10	1.39507e-09
SSON53G_RS16190	yfiL	DUF2799 domain-containing protein	1.57419	8.85123	2.73163e-10	1.40854e-09
SSON53G_RS26880	mxiH	EscF/YscF/HrpA family type III secretion system needle major subunit	-3.14706	8.82502	2.90416e-10	1.49615e-09
SSON53G_RS06440	pgsA	CDP-diacylglycerol--glycerol-3-phosphate 3-phosphatidyltransferase	-1.04567	8.80605	3.03656e-10	1.56295e-09
SSON53G_RS01055	ldcC1	lysine decarboxylase constitutive	1.11641	8.80283	3.06194e-10	1.57459e-09
SSON53G_RS02805		hypothetical protein	0.737567	8.79978	3.0863e-10	1.58569e-09
SSON53G_RS20630	livG	ABC transporter ATP-binding protein	2.09467	8.79624	3.11439e-10	1.59869e-09
SSON53G_RS13760		YfcL family protein	-1.04016	8.79013	3.16138e-10	1.62134e-09
SSON53G_RS12460	gatY_2	tagatose-1,6-bisphosphate aldolase	2.55447	8.78347	3.2131e-10	1.64639e-09
SSON53G_RS00835	dksA	RNA polymerase-binding transcription factor DksA	-0.728346	8.77952	3.24537e-10	1.66143e-09
SSON53G_RS24070		DUF416 domain-containing protein	-0.999325	8.77422	3.28811e-10	1.6818e-09
SSON53G_RS01150		23S ribosomal RNA	1.04211	8.76513	3.36068e-10	1.71738e-09
SSON53G_RS14370	yfeO	ion channel protein	1.15492	8.75641	3.43191e-10	1.75221e-09
SSON53G_RS24060	hemE	uroporphyrinogen decarboxylase	-0.945046	8.75188	3.47099e-10	1.77058e-09
SSON53G_RS04300	rlmF	23S rRNA (adenine(1618)-N(6))-methyltransferase RlmF	1.44281	8.74945	3.49365e-10	1.78054e-09
SSON53G_RS12760	cdd	cytidine deaminase	-0.940404	8.74093	3.566e-10	1.81579e-09
SSON53G_RS26010		membrane protein	-1.75245	8.72521	3.70075e-10	1.88273e-09
SSON53G_RS08810	rnfB	electron transport complex subunit RsxB	1.09568	8.70259	3.90208e-10	1.98338e-09
SSON53G_RS10110	uspF	universal stress protein F	0.656445	8.68438	4.07283e-10	2.06833e-09
SSON53G_RS13550	nuoE	NADH-quinone oxidoreductase subunit E	-0.916493	8.65812	4.33052e-10	2.19724e-09
SSON53G_RS21345		DUF1198 domain-containing protein	-1.12154	8.63536	4.56756e-10	2.31545e-09
SSON53G_RS13405	arnD	4-deoxy-4-formamido-L-arabinose- phosphoundecaprenol deformylase ArnD	1.30525	8.63324	4.59525e-10	2.32679e-09
SSON53G_RS23130	yihI	GTPase-activating protein	0.788472	8.63324	4.59809e-10	2.32679e-09
SSON53G_RS20635	livM	high-affinity branched-chain amino acid ABC transporter permease LivM	1.77354	8.60948	4.86106e-10	2.45768e-09
SSON53G_RS09930		DUF465 domain-containing protein	0.993187	8.59467	5.03404e-10	2.54288e-09
SSON53G_RS14435		tRNA-Val	1.22917	8.59032	5.08922e-10	2.56848e-09
SSON53G_RS02595	ybcJ	ribosome-associated protein	-0.861322	8.57387	5.2904e-10	2.66765e-09
SSON53G_RS23140	yshB	hypothetical protein	0.80835	8.55846	5.48632e-10	2.764e-09
SSON53G_RS23700	rpmE	50S ribosomal protein L31	-1.08111	8.55606	5.52158e-10	2.77931e-09
SSON53G_RS05215	yccU	CoA-binding protein	0.913668	8.55508	5.53897e-10	2.78561e-09
SSON53G_RS19140	rpsO	30S ribosomal protein S15	-1.00696	8.54743	5.64232e-10	2.83508e-09
SSON53G_RS18855	yqjC	DUF1090 domain-containing protein	0.729924	8.54659	5.65828e-10	2.8406e-09
SSON53G_RS19530		AsmA2 domain-containing protein	-0.578406	8.5394	5.75785e-10	2.88804e-09
SSON53G_RS12915		YkgJ family cysteine cluster protein	1.7965	8.53481	5.82405e-10	2.91868e-09
SSON53G_RS19930	rpsS	30S ribosomal protein S19	-0.806938	8.52033	6.02688e-10	3.01767e-09
SSON53G_RS24565	gltP	glutamate/aspartate:proton symporter GltP	-1.02798	8.51697	6.07899e-10	3.0411e-09
SSON53G_RS03285		tRNA-Leu	-0.905535	8.51493	6.11296e-10	3.05541e-09
SSON53G_RS18640	rpsU	30S ribosomal protein S21	1.01806	8.50858	6.20841e-10	3.1004e-09
SSON53G_RS12940		bifunctional murein DD-endopeptidase/murein LD-carboxypeptidase	0.685624	8.50517	6.26291e-10	3.12488e-09
SSON53G_RS30045	hypothetical protein	hypothetical protein	-2.32796	8.49393	6.43274e-10	3.20681e-09
SSON53G_RS18650	rpoD	RNA polymerase sigma factor RpoD	0.570637	8.48676	6.54545e-10	3.26015e-09
SSON53G_RS11910	mtfA	protein MtfA	0.721189	8.47548	6.72361e-10	3.34597e-09
SSON53G_RS19125	deaD	DEAD/DEAH box family ATP-dependent RNA helicase	0.725734	8.46405	6.90885e-10	3.43515e-09
SSON53G_RS19825	rpoA	DNA-directed RNA polymerase subunit alpha	-0.813856	8.45578	7.04792e-10	3.50124e-09
SSON53G_RS22625	rhlB	ATP-dependent RNA helicase RhlB	-0.539701	8.44856	7.1723e-10	3.55993e-09
SSON53G_RS12680	yohO	membrane protein	1.04682	8.43579	7.39272e-10	3.66615e-09
SSON53G_RS11680		AraC family transcriptional regulator	2.2938	8.43015	7.49582e-10	3.71405e-09
SSON53G_RS01505	crl	sigma factor-binding protein Crl	0.566761	8.40856	7.88996e-10	3.90337e-09
SSON53G_RS02495	hypothetical protein	hypothetical protein	-1.01875	8.40856	7.89161e-10	3.90337e-09
SSON53G_RS23380	cpxP	periplasmic protein CpxP	0.604279	8.38452	8.34792e-10	4.12549e-09
SSON53G_RS18945	tdcB	serine/threonine dehydratase	-4.08656	8.38275	8.38933e-10	4.14237e-09
SSON53G_RS04515		multidrug transporter MdfA	0.982012	8.37469	8.55387e-10	4.21996e-09
SSON53G_RS01195		SAM-dependent methyltransferase	-0.924725	8.35573	8.94344e-10	4.40834e-09
SSON53G_RS13425	pmrD	signal transduction protein PmrD	-0.837993	8.3516	9.04216e-10	4.4504e-09
SSON53G_RS25380		autotransporter assembly complex protein TamA	-0.727714	8.3516	9.04438e-10	4.4504e-09
SSON53G_RS07755	yeaA	peptide-methionine (R)-S-oxide reductase	1.05546	8.33404	9.42563e-10	4.634e-09
SSON53G_RS22000		Hok/Gef family protein	-1.03885	8.33095	9.50129e-10	4.66717e-09
SSON53G_RS17535	nlpD_1	lipoprotein	-0.852569	8.31066	9.96424e-10	4.89036e-09
SSON53G_RS19715		tRNA-Thr	-2.18366	8.30906	1.00097e-09	4.90846e-09
SSON53G_RS19610	prmA	50S ribosomal protein L11 methyltransferase	-0.67516	8.30739	1.00611e-09	4.92733e-09
SSON53G_RS01880	hypothetical protein	hypothetical protein	1.56972	8.30739	1.00655e-09	4.92733e-09
SSON53G_RS06080	potD	spermidine/putrescine ABC transporter substrate-binding protein PotD	-0.833121	8.30168	1.02074e-09	4.99254e-09
SSON53G_RS01410		class II glutamine amidotransferase	-0.977881	8.2777	1.08011e-09	5.27594e-09
SSON53G_RS00050	mog	molybdopterin adenylyltransferase	-1.08349	8.2777	1.08054e-09	5.27594e-09
SSON53G_RS10245		DUF1367 domain-containing protein	1.47029	8.27382	1.09116e-09	5.32326e-09
SSON53G_RS14330	mrkE	DNA-binding response regulator	-1.26845	8.2732	1.09365e-09	5.33086e-09
SSON53G_RS14495	crr	glucose-specific phosphotransferase enzyme IIA component	-0.563459	8.26359	1.11909e-09	5.4502e-09
SSON53G_RS20135	nirD	nitrite reductase small subunit	-4.07357	8.23179	1.20591e-09	5.86425e-09
SSON53G_RS17115	relA	GTP pyrophosphokinase	-0.774999	8.23179	1.20617e-09	5.86425e-09
SSON53G_RS03765	galE	UDP-glucose 4-epimerase GalE	-1.45884	8.22049	1.23902e-09	6.01887e-09
SSON53G_RS26885	mxiI	protein MxiI	-2.57005	8.21251	1.26307e-09	6.13044e-09
SSON53G_RS17685	fldB	flavodoxin-2	-1.02132	8.19922	1.30342e-09	6.32093e-09
SSON53G_RS16865	surE	5'/3'-nucleotidase SurE	-0.751053	8.19643	1.31292e-09	6.36158e-09
SSON53G_RS06875	ruvC	crossover junction endodeoxyribonuclease RuvC	-0.827476	8.19429	1.32053e-09	6.39302e-09
SSON53G_RS25200	bsmA	lipoprotein BsmA	0.921687	8.17174	1.39211e-09	6.73384e-09
SSON53G_RS18515	yqiC	hypothetical protein	-0.690885	8.16695	1.40872e-09	6.80842e-09
SSON53G_RS07995	tcyP	L-cystine transporter	-0.921146	8.16357	1.42093e-09	6.86162e-09
SSON53G_RS09880		transposase	-0.716402	8.15754	1.44204e-09	6.95768e-09
SSON53G_RS22490		16S ribosomal RNA	1.27003	8.15023	1.46775e-09	7.07572e-09
SSON53G_RS27290	lpxM	lauroyl-Kdo(2)-lipid IV(A) myristoyltransferase	-1.65498	8.08809	1.69495e-09	8.16413e-09
SSON53G_RS06260	ycgN	YcgN family cysteine cluster protein	0.872965	8.07849	1.73432e-09	8.34667e-09
SSON53G_RS00735	panB	3-methyl-2-oxobutanoate hydroxymethyltransferase	-0.85861	8.07757	1.73946e-09	8.36437e-09
SSON53G_RS18935	tdcD	propionate kinase	-2.14698	8.07344	1.75754e-09	8.44419e-09
SSON53G_RS09510	gsiA_3	ABC transporter ATP-binding protein	1.72859	8.06834	1.77981e-09	8.544e-09
SSON53G_RS26890	mxiJ	EscJ/YscJ/HrcJ family type III secretion inner membrane ring protein	-2.08096	8.0552	1.83602e-09	8.80639e-09
SSON53G_RS00860	mrcB	penicillin-binding protein 1B	-0.744998	8.05371	1.84389e-09	8.83674e-09
SSON53G_RS12320	yegH	TerC family protein	-0.838891	8.04247	1.89384e-09	9.06849e-09
SSON53G_RS00960	map	methionine aminopeptidase	-1.00838	8.03061	1.94788e-09	9.31941e-09
SSON53G_RS14480	cysK	cysteine synthase A	-0.789318	8.01902	2.00224e-09	9.57148e-09
SSON53G_RS01875	yaiH	D-alanyl-D-alanine- carboxypeptidase/endopeptidase AmpH	0.889973	8.01668	2.01475e-09	9.6232e-09
SSON53G_RS24810	dcuB	anaerobic C4-dicarboxylate transporter DcuB	-1.7407	7.99641	2.1128e-09	1.00831e-08
SSON53G_RS11580	pth	aminoacyl-tRNA hydrolase	1.09536	7.99586	2.11724e-09	1.00958e-08
SSON53G_RS11590	hypothetical protein	hypothetical protein	2.26114	7.98682	2.16356e-09	1.03081e-08
SSON53G_RS16510	ygaZ	branched-chain amino acid ABC transporter permease	-0.800553	7.96291	2.28792e-09	1.08915e-08
SSON53G_RS09400	rstB	two-component system sensor histidine kinase RstB	-0.984139	7.9575	2.31853e-09	1.1028e-08
SSON53G_RS03710		IS21 family transposase	1.86379	7.95586	2.32926e-09	1.10698e-08
SSON53G_RS01895	yaiY	hypothetical protein	2.21469	7.95283	2.34754e-09	1.11474e-08
SSON53G_RS06520		arabinose ABC transporter permease	1.77044	7.94898	2.3704e-09	1.12466e-08
SSON53G_RS19925	rplV	50S ribosomal protein L22	-0.626441	7.94495	2.39451e-09	1.13515e-08
SSON53G_RS22510		tRNA-Asp	-1.38062	7.94064	2.42036e-09	1.14645e-08
SSON53G_RS03070	tatE	twin-arginine translocase subunit TatA	0.927571	7.91943	2.54362e-09	1.20384e-08
SSON53G_RS04885	aroA	3-phosphoshikimate 1-carboxyvinyltransferase	0.887362	7.91126	2.59407e-09	1.2267e-08
SSON53G_RS04695	ybjE	transporter	1.06524	7.91033	2.60182e-09	1.22935e-08
SSON53G_RS03745	gpmA	2,3-bisphosphoglycerate-dependent phosphoglycerate mutase	-0.672082	7.90641	2.62754e-09	1.24047e-08
SSON53G_RS05170	hypothetical protein	hypothetical protein	1.66701	7.89711	2.68668e-09	1.26734e-08
SSON53G_RS03415	kdpD	two-component system sensor histidine kinase KdbD	1.01575	7.88833	2.7438e-09	1.29321e-08
SSON53G_RS00615	ampD	1,6-anhydro-N-acetylmuramyl-L-alanine amidase AmpD	-0.927341	7.87988	2.80002e-09	1.31862e-08
SSON53G_RS17920	speA	arginine decarboxylase	-0.692552	7.86706	2.8863e-09	1.35813e-08
SSON53G_RS17680	xerD	tyrosine recombinase XerD	-0.848829	7.86549	2.89916e-09	1.36306e-08
SSON53G_RS02535	ybbL	iron export ATP-binding protein FetA	-1.59725	7.85829	2.94999e-09	1.38582e-08
SSON53G_RS00180	rihC	non-specific ribonucleoside hydrolase RihC	-1.34196	7.84095	3.07274e-09	1.44229e-08
SSON53G_RS15040	iscA	iron-sulfur cluster assembly accessory protein	0.679482	7.8405	3.07844e-09	1.44378e-08
SSON53G_RS09505	ddpC	cytochrome c550	2.10481	7.83535	3.11775e-09	1.46101e-08
SSON53G_RS13565	nuoA	NADH-quinone oxidoreductase subunit A	-0.734766	7.8185	3.2437e-09	1.51879e-08
SSON53G_RS25305		OapA family protein	-0.904914	7.81356	3.28351e-09	1.53616e-08
SSON53G_RS10080		YdbH family protein	-0.929071	7.80742	3.33303e-09	1.55806e-08
SSON53G_RS04870	ycaO	30S ribosomal protein S12 methylthiotransferase accessory protein YcaO	-0.647047	7.79695	3.41712e-09	1.59605e-08
SSON53G_RS17710	yqfB	ASCH domain-containing protein	-1.16564	7.79058	3.47045e-09	1.61964e-08
SSON53G_RS19570	yhdH	acrylyl-CoA reductase AcuI	-0.976046	7.78695	3.50248e-09	1.63325e-08
SSON53G_RS09345		serine protease	0.620547	7.76154	3.71654e-09	1.73165e-08
SSON53G_RS14270	oxc	oxalyl-CoA decarboxylase	3.05498	7.75647	3.76328e-09	1.752e-08
SSON53G_RS00105	nhaA	Na+/H+ antiporter NhaA	0.662874	7.75368	3.79062e-09	1.76329e-08
SSON53G_RS00495	murF	UDP-N-acetylmuramoyl-tripeptide--D-alanyl-D- alanine ligase	-0.611453	7.75211	3.8074e-09	1.76965e-08
SSON53G_RS14470	zipA	cell division protein ZipA	-0.712857	7.74977	3.83372e-09	1.77923e-08
SSON53G_RS23990	rplK	50S ribosomal protein L11	-0.6934	7.74977	3.83425e-09	1.77923e-08
SSON53G_RS23605	sbp	sulfate-binding protein	-1.47461	7.74458	3.88347e-09	1.80061e-08
SSON53G_RS28075	hypothetical protein	hypothetical protein	1.35466	7.74296	3.90115e-09	1.80733e-08
SSON53G_RS07170		paraquat-inducible protein A	0.645758	7.71885	4.12718e-09	1.9105e-08
SSON53G_RS25615	idnT	fructuronate transporter	-0.968541	7.71218	4.19449e-09	1.94008e-08
SSON53G_RS33175		hypothetical protein	-0.934042	7.70087	4.3087e-09	1.99129e-08
SSON53G_RS07145		DUF1482 domain-containing protein	1.24727	7.66562	4.6767e-09	2.15961e-08
SSON53G_RS08760	pdxY	pyridoxamine kinase	-0.882428	7.6645	4.69266e-09	2.16523e-08
SSON53G_RS19520	aaeR	HTH-type transcriptional activator AaeR	-1.00838	7.65996	4.7458e-09	2.18798e-08
SSON53G_RS11805	yedI	DUF808 domain-containing protein	1.2158	7.6443	4.92398e-09	2.26829e-08
SSON53G_RS15800	rseB	sigma-E factor regulatory protein RseB	0.542692	7.63262	5.06235e-09	2.33015e-08
SSON53G_RS22655	wzzE	LPS biosynthesis protein	-0.754577	7.62968	5.10081e-09	2.34596e-08
SSON53G_RS13530	nuoI	NADH-quinone oxidoreductase subunit I	-1.08606	7.61347	5.29906e-09	2.43518e-08
SSON53G_RS22245	yhjD	inner membrane protein YhjD	0.703597	7.61025	5.34277e-09	2.45328e-08
SSON53G_RS31175	hypothetical protein	hypothetical protein	2.43219	7.58624	5.65101e-09	2.59273e-08
SSON53G_RS23440		DUF262 domain-containing protein	-0.766015	7.57999	5.7376e-09	2.63035e-08
SSON53G_RS09015		lipoprotein/autotransporter domain-containing protein	1.18707	7.57775	5.7719e-09	2.64395e-08
SSON53G_RS04305	kefA_2	moderate conductance mechanosensitive channel YbiO	1.02633	7.57607	5.79887e-09	2.65417e-08
SSON53G_RS33090	hypothetical protein	hypothetical protein	-2.89173	7.57433	5.82691e-09	2.66486e-08
SSON53G_RS04660	amiD	N-acetylmuramoyl-L-alanine amidase	1.2684	7.55831	6.05069e-09	2.76499e-08
SSON53G_RS22790	xerC	tyrosine recombinase XerC	-1.0877	7.55648	6.08099e-09	2.77661e-08
SSON53G_RS26035		DUF1435 domain-containing protein	3.84621	7.55265	6.1398e-09	2.80122e-08
SSON53G_RS16530	emrB	multidrug effux MFS transporter subunit EmrB	-1.14652	7.55151	6.16084e-09	2.80858e-08
SSON53G_RS19625	yhdJ	adenine-specific DNA-methyltransferase	1.41386	7.53679	6.37838e-09	2.90542e-08
SSON53G_RS17275		tRNA-Met	1.19276	7.53677	6.38385e-09	2.90559e-08
SSON53G_RS12990	rplY	50S ribosomal protein L25	0.610379	7.53668	6.3902e-09	2.90617e-08
SSON53G_RS13640	yfcF	glutathione S-transferase	1.30533	7.52745	6.53263e-09	2.96857e-08
SSON53G_RS17155	yqcC	hypothetical protein	2.0709	7.49534	7.03952e-09	3.19637e-08
SSON53G_RS29955	hypothetical protein	hypothetical protein	1.07714	7.47038	7.46194e-09	3.38548e-08
SSON53G_RS25195	ycfR_2	DUF1471 domain-containing protein	0.862446	7.46436	7.57204e-09	3.4327e-08
SSON53G_RS15865	eamB	cysteine/O-acetylserine efflux protein	1.22854	7.45988	7.65666e-09	3.4683e-08
SSON53G_RS23075	yihD	hypothetical protein	-0.792013	7.45848	7.68748e-09	3.4795e-08
SSON53G_RS28665	hypothetical protein	hypothetical protein	1.86851	7.45406	7.77238e-09	3.51514e-08
SSON53G_RS14935	guaA	GMP synthase (glutamine-hydrolyzing)	-0.851367	7.45192	7.81701e-09	3.53252e-08
SSON53G_RS27155		IS3 family transposase	-0.623816	7.43909	8.05772e-09	3.63842e-08
SSON53G_RS00325	surA	chaperone SurA	-0.608347	7.4124	8.57512e-09	3.86898e-08
SSON53G_RS01970	ppnP	hypothetical protein	-0.686309	7.40928	8.64393e-09	3.89694e-08
SSON53G_RS20575	yhhY	N-acetyltransferase	-1.32913	7.38221	9.20705e-09	4.14754e-08
SSON53G_RS21855	yibT	hypothetical protein	0.760601	7.37947	9.27263e-09	4.17378e-08
SSON53G_RS07770	ansA	L-asparaginase 1	0.954234	7.36913	9.50364e-09	4.27439e-08
SSON53G_RS14895	purN	phosphoribosylglycinamide formyltransferase	-1.03154	7.34918	9.95824e-09	4.47532e-08
SSON53G_RS27025		hypothetical protein	-0.867821	7.34615	1.00357e-08	4.5066e-08
SSON53G_RS20375	bioH	pimeloyl-[acyl-carrier protein] methyl ester esterase	-1.11884	7.33925	1.02044e-08	4.57875e-08
SSON53G_RS21645	ttk	nucleoid occlusion factor SlmA	-0.728351	7.32097	1.06517e-08	4.77568e-08
SSON53G_RS20625	livF	ABC transporter ATP-binding protein	1.88571	7.3167	1.07652e-08	4.82278e-08
SSON53G_RS10535		DUF2534 domain-containing protein	0.656176	7.31589	1.07939e-08	4.83183e-08
SSON53G_RS21800	grxC	glutaredoxin	-0.902032	7.30415	1.10984e-08	4.96425e-08
SSON53G_RS33040		glycosyl transferase	1.87051	7.29966	1.12223e-08	5.01575e-08
SSON53G_RS07150		DUF1480 domain-containing protein	4.13329	7.29931	1.12403e-08	5.01986e-08
SSON53G_RS09525		biofilm-dependent modulation protein	2.03423	7.29472	1.13686e-08	5.07319e-08
SSON53G_RS21870	mtlA_2	PTS mannitol transporter subunit IICBA	0.868582	7.2892	1.15232e-08	5.13812e-08
SSON53G_RS16870	truD	tRNA pseudouridine(13) synthase TruD	-0.871802	7.28816	1.15597e-08	5.15037e-08
SSON53G_RS32225	ibsA	small toxic protein IbsA	1.78154	7.28432	1.16713e-08	5.19607e-08
SSON53G_RS14615	eutB	ethanolamine ammonia-lyase subunit EutB	2.02211	7.24491	1.27901e-08	5.68969e-08
SSON53G_RS20890	ygaV_2	ArsR family transcriptional regulator	-1.6503	7.23927	1.29673e-08	5.76405e-08
SSON53G_RS19845	rpmJ	50S ribosomal protein L36	-0.622827	7.23111	1.32237e-08	5.87341e-08
SSON53G_RS25415	yjfF	ABC transporter permease	1.20067	7.23013	1.32639e-08	5.88669e-08
SSON53G_RS23935	murB	UDP-N-acetylenolpyruvoylglucosamine reductase	-0.817623	7.2104	1.38911e-08	6.16027e-08
SSON53G_RS16110	grpE	nucleotide exchange factor GrpE	0.494708	7.19874	1.42802e-08	6.32789e-08
SSON53G_RS24575		formate dehydrogenase N subunit alpha, selenocysteine-containing	-1.20685	7.17394	1.51312e-08	6.6998e-08
SSON53G_RS16770	hypD	hydrogenase formation protein HypD	-1.53895	7.1736	1.51549e-08	6.70506e-08
SSON53G_RS25445	nrdG	anaerobic ribonucleoside-triphosphate reductase-activating protein	-1.59939	7.16594	1.54364e-08	6.82431e-08
SSON53G_RS20225	gph	phosphoglycolate phosphatase	-0.868546	7.1571	1.5766e-08	6.96464e-08
SSON53G_RS16290		tRNA-Arg	0.961567	7.14928	1.6065e-08	7.09122e-08
SSON53G_RS21080	yidZ	transcriptional regulator	-0.983597	7.14624	1.61901e-08	7.14094e-08
SSON53G_RS19525	tldD	metalloprotease TldD	-0.553357	7.1395	1.64562e-08	7.25268e-08
SSON53G_RS24980		DUF4156 domain-containing protein	-0.891906	7.13652	1.65825e-08	7.30271e-08
SSON53G_RS19915	rplP	50S ribosomal protein L16	-0.634831	7.12605	1.7e-08	7.48077e-08
SSON53G_RS11810		EamA family transporter	0.991253	7.09537	1.82584e-08	8.02836e-08
SSON53G_RS19780	def	peptide deformylase	-0.45517	7.09491	1.82918e-08	8.03685e-08
SSON53G_RS26865	ipgE	chaperone protein IpgE	-1.5117	7.08801	1.85994e-08	8.16569e-08
SSON53G_RS00525	ddl	D-alanine--D-alanine ligase B	-0.587889	7.0812	1.89077e-08	8.29467e-08
SSON53G_RS14390	nupC	NupC/NupG family nucleoside CNT transporter	0.923803	7.07881	1.90268e-08	8.3405e-08
SSON53G_RS02915		DUF466 domain-containing protein	1.07705	7.07834	1.9062e-08	8.34952e-08
SSON53G_RS00010	thrA	bifunctional aspartate kinase/homoserine dehydrogenase I	0.600389	7.05696	2.00393e-08	8.77085e-08
SSON53G_RS03110	rlpA	endolytic peptidoglycan transglycosylase RlpA	-0.639625	7.04972	2.03915e-08	8.91816e-08
SSON53G_RS04785	ftsK	DNA translocase FtsK	-0.461512	7.04812	2.04826e-08	8.95111e-08
SSON53G_RS00290	kefF	glutathione-regulated potassium-efflux system ancillary protein KefF	1.22998	7.03897	2.09348e-08	9.14176e-08
SSON53G_RS04605	rumB	23S rRNA (uracil(747)-C(5))-methyltransferase RlmC	1.23368	7.03522	2.11323e-08	9.22094e-08
SSON53G_RS20790	macA_3	membrane protein	-1.24265	7.02313	2.17456e-08	9.48126e-08
SSON53G_RS00610	nadC	carboxylating nicotinate-nucleotide diphosphorylase	-0.695244	7.01723	2.20598e-08	9.61094e-08
SSON53G_RS29120		transposase	2.48412	7.00174	2.28962e-08	9.96012e-08
SSON53G_RS32775		IS3 family transposase	1.61193	7.00174	2.2894e-08	9.96012e-08
SSON53G_RS11655		IS200/IS605 family transposase	-1.27761	7.00071	2.29679e-08	9.98369e-08
SSON53G_RS02430	ybaB	YbaB/EbfC family nucleoid-associated protein	-0.723712	7.00059	2.29919e-08	9.98649e-08
SSON53G_RS03645		protein TolQ	0.768915	6.99672	2.3215e-08	1.00757e-07
SSON53G_RS32330	hypothetical protein	hypothetical protein	1.15333	6.99416	2.33703e-08	1.01354e-07
SSON53G_RS22955	rmuC	DNA recombination protein RmuC	-1.10713	6.99288	2.34571e-08	1.01653e-07
SSON53G_RS06185	hypothetical protein	hypothetical protein	1.5983	6.99135	2.35576e-08	1.02011e-07
SSON53G_RS13575	lrhA	transcriptional regulator	-0.687869	6.9502	2.59185e-08	1.12149e-07
SSON53G_RS11575	ychH	membrane protein	0.824054	6.94238	2.64094e-08	1.14187e-07
SSON53G_RS24110		16S ribosomal RNA	1.38277	6.89196	2.9683e-08	1.28244e-07
SSON53G_RS26570	hypothetical protein	hypothetical protein	1.20854	6.8771	3.07399e-08	1.3271e-07
SSON53G_RS09790		GhoT/OrtT family toxin	1.38111	6.86346	3.17626e-08	1.36944e-07
SSON53G_RS27180		transporter	1.37391	6.86346	3.17688e-08	1.36944e-07
SSON53G_RS13165	alkB	DNA oxidative demethylase AlkB	1.1263	6.86256	3.18584e-08	1.37227e-07
SSON53G_RS19725		23S ribosomal RNA	0.94111	6.86195	3.19276e-08	1.37421e-07
SSON53G_RS19280	yrbB	phospholipid ABC transporter-binding protein	-0.743037	6.85764	3.227e-08	1.3879e-07
SSON53G_RS01390	yafV	amidohydrolase	-0.832601	6.85745	3.23088e-08	1.38852e-07
SSON53G_RS20145	cysG	siroheme synthase	-0.842829	6.8537	3.26137e-08	1.40057e-07
SSON53G_RS06895	znuB	zinc ABC transporter permease	-0.814598	6.84468	3.33231e-08	1.42996e-07
SSON53G_RS16505	ynfM_1	MFS transporter	1.38402	6.8263	3.47896e-08	1.49177e-07
SSON53G_RS04830	ycaM	inner membrane transporter YcaM	1.49511	6.82142	3.52089e-08	1.50861e-07
SSON53G_RS14745	ypfI	tRNA(Met) cytidine acetyltransferase	-0.595276	6.8109	3.61197e-08	1.54561e-07
SSON53G_RS07180	proQ	RNA chaperone ProQ	-0.649841	6.8109	3.61267e-08	1.54561e-07
SSON53G_RS22340	asnA	asparagine synthetase A	-1.11417	6.80536	3.66179e-08	1.56546e-07
SSON53G_RS06120	phoP	two-component system response regulator PhoP	-0.816472	6.80012	3.70901e-08	1.58445e-07
SSON53G_RS00350	polB	DNA polymerase II	0.713184	6.75431	4.12469e-08	1.76071e-07
SSON53G_RS10225		tRNA-Arg	0.88065	6.74702	4.1977e-08	1.79054e-07
SSON53G_RS22425		glycoside hydrolase	-1.33813	6.73874	4.28167e-08	1.82499e-07
SSON53G_RS30405	hypothetical protein	hypothetical protein	3.12666	6.73651	4.30692e-08	1.83438e-07
SSON53G_RS22975	tatA	twin-arginine translocase subunit TatA	-0.671359	6.73231	4.35206e-08	1.85223e-07
SSON53G_RS19990	tuf	translation elongation factor EF-Tu 1	-0.460002	6.66784	5.05228e-08	2.14863e-07
SSON53G_RS11340	kch	voltage-gated potassium channel	0.830836	6.65577	5.19853e-08	2.20918e-07
SSON53G_RS16095	smpA	outer membrane protein assembly factor BamE	-0.754736	6.65534	5.21014e-08	2.21134e-07
SSON53G_RS13065	narP	DNA-binding response regulator	1.09934	6.65534	5.21137e-08	2.21134e-07
SSON53G_RS31420		DUF2754 domain-containing protein	1.02387	6.65223	5.25279e-08	2.22726e-07
SSON53G_RS18430	qseB	two-component system response regulator QseB	-1.57282	6.6437	5.36097e-08	2.27144e-07
SSON53G_RS19300	mlaF	phospholipid ABC transporter ATP-binding protein MlaF	-0.952688	6.64137	5.39381e-08	2.28366e-07
SSON53G_RS25210	ulaR	transcriptional regulator	-1.13242	6.63855	5.43294e-08	2.29852e-07
SSON53G_RS26455		ParA family protein	-0.592029	6.63639	5.46408e-08	2.30998e-07
SSON53G_RS11025		phage tail protein	1.46859	6.63471	5.49753e-08	2.31896e-07
SSON53G_RS18785	ygjR	gfo/Idh/MocA family oxidoreductase	-0.757731	6.63471	5.49409e-08	2.31896e-07
SSON53G_RS10500		aminobenzoyl-glutamate transporter	-1.37506	6.63471	5.49064e-08	2.31896e-07
SSON53G_RS00870	fhuC	iron-hydroxamate transporter ATP-binding protein	0.982503	6.61522	5.75404e-08	2.42537e-07
SSON53G_RS26130	deoD	purine-nucleoside phosphorylase	0.640543	6.60812	5.85527e-08	2.46535e-07
SSON53G_RS20395	malQ	4-alpha-glucanotransferase	-0.903158	6.60812	5.85752e-08	2.46535e-07
SSON53G_RS06075	npdA	NAD-dependent deacylase	-0.82596	6.60678	5.87998e-08	2.47297e-07
SSON53G_RS20060	yheS_1	ABC transporter ATP-binding protein	-0.714598	6.60239	5.94405e-08	2.49808e-07
SSON53G_RS09385	folM	dihydrofolate reductase FolM	1.05551	6.59726	6.01916e-08	2.52778e-07
SSON53G_RS24000	rplJ	50S ribosomal protein L10	-0.658473	6.59606	6.04032e-08	2.5348e-07
SSON53G_RS06230	minC	septum site-determining protein MinC	-0.706518	6.59296	6.08796e-08	2.55291e-07
SSON53G_RS04775	trxB	thioredoxin reductase	-0.509968	6.58484	6.20751e-08	2.60113e-07
SSON53G_RS11585	engD	redox-regulated ATPase YchF	0.590988	6.5812	6.26429e-08	2.623e-07
SSON53G_RS20390	gntT	idonate transporter	-0.916193	6.56441	6.51608e-08	2.72643e-07
SSON53G_RS25590	pepA	cytosol aminopeptidase	-0.629963	6.55041	6.73449e-08	2.81575e-07
SSON53G_RS20400	malP	maltodextrin phosphorylase	-0.907084	6.54391	6.84094e-08	2.85816e-07
SSON53G_RS14520	cysA	sulfate/thiosulfate import ATP-binding protein CysA	0.896683	6.54133	6.88685e-08	2.87523e-07
SSON53G_RS05430	wrbA	NAD(P)H dehydrogenase (quinone)	1.02351	6.54124	6.89325e-08	2.8758e-07
SSON53G_RS01515	proB	glutamate 5-kinase	-0.657945	6.51844	7.27019e-08	3.03084e-07
SSON53G_RS10105	ompN_3	porin OmpS2	1.84384	6.50941	7.42824e-08	3.09447e-07
SSON53G_RS01005	bamA	outer membrane protein assembly factor BamA	-0.443968	6.5042	7.52348e-08	3.13185e-07
SSON53G_RS19775	dprA	DNA-protecting protein DprA	-0.719378	6.48522	7.86519e-08	3.27171e-07
SSON53G_RS19555	mreB	rod shape-determining protein	0.472672	6.46701	8.20813e-08	3.41188e-07
SSON53G_RS17255	csdE	sulfur acceptor protein CsdE	-0.989587	6.46186	8.31446e-08	3.45253e-07
SSON53G_RS19590	accB	acetyl-CoA carboxylase biotin carboxyl carrier protein subunit	-0.711423	6.46186	8.31804e-08	3.45253e-07
SSON53G_RS06300	nhaB	Na+/H+ antiporter NhaB	-0.641355	6.45764	8.40532e-08	3.48622e-07
SSON53G_RS14505	pdxK	pyridoxine kinase	-0.86034	6.45581	8.44723e-08	3.50096e-07
SSON53G_RS15060	trmJ	tRNA (cytidine/uridine-2'-O-)-methyltransferase TrmJ	-0.555021	6.45581	8.45313e-08	3.50096e-07
SSON53G_RS20715	yhhQ	hypothetical protein	0.993601	6.44693	8.63407e-08	3.5733e-07
SSON53G_RS14620	eutA	ethanolamine ammonia-lyase reactivating factor EutA	1.91273	6.44628	8.65329e-08	3.57866e-07
SSON53G_RS27570	insA	hypothetical protein	-0.996635	6.39773	9.6837e-08	4.00189e-07
SSON53G_RS07400		DUF333 domain-containing protein	-1.20799	6.39696	9.70804e-08	4.00905e-07
SSON53G_RS06345		GlsB/YeaQ/YmgE family stress response membrane protein	2.72859	6.38108	1.00769e-07	4.15838e-07
SSON53G_RS22475		ribose operon repressor	-0.923081	6.38029	1.01026e-07	4.16595e-07
SSON53G_RS21450		MFS transporter	1.1659	6.37843	1.01531e-07	4.18376e-07
SSON53G_RS22040		molybdopterin guanine dinucleotide-containing S/N-oxide reductase	-0.958466	6.37301	1.02881e-07	4.2363e-07
SSON53G_RS05640	ymdB	O-acetyl-ADP-ribose deacetylase	0.884993	6.3602	1.06038e-07	4.36316e-07
SSON53G_RS24120		23S ribosomal RNA	0.966099	6.34558	1.09748e-07	4.51258e-07
SSON53G_RS15850	srmB	ATP-dependent RNA helicase SrmB	0.620754	6.33399	1.12796e-07	4.63453e-07
SSON53G_RS13325	glpT	glycerol-3-phosphate transporter	1.43016	6.33227	1.13326e-07	4.65298e-07
SSON53G_RS20000	rpsG	30S ribosomal protein S7	-0.595622	6.3068	1.20258e-07	4.93404e-07
SSON53G_RS07040	yebZ	membrane protein	-1.20402	6.30057	1.22082e-07	5.00529e-07
SSON53G_RS32185	hypothetical protein	hypothetical protein	1.85117	6.29609	1.23437e-07	5.0572e-07
SSON53G_RS11325	hypothetical protein	hypothetical protein	3.40781	6.29299	1.24411e-07	5.09343e-07
SSON53G_RS17720	ycdF	NAD(P)-dependent oxidoreductase	-2.01537	6.28361	1.27217e-07	5.20459e-07
SSON53G_RS22870	yigI	4HBT family thioesterase YigI	1.3629	6.28337	1.27379e-07	5.20748e-07
SSON53G_RS18395	ygiQ	YgiQ family radical SAM protein	0.563512	6.26329	1.33504e-07	5.45396e-07
SSON53G_RS10775		DUF2543 domain-containing protein	1.29045	6.25578	1.35929e-07	5.54905e-07
SSON53G_RS21440	iucB	N-acetyltransferase	1.92966	6.25044	1.37709e-07	5.61772e-07
SSON53G_RS26975		EscU/YscU/HrcU family type III secretion system export apparatus switch protein	-1.74001	6.24614	1.3918e-07	5.67366e-07
SSON53G_RS26850	ipgA	chaperone protein IpgA	-2.87607	6.24486	1.39689e-07	5.69032e-07
SSON53G_RS09090	marB	multiple antibiotic resistance protein MarB	-1.51424	6.24465	1.39857e-07	5.69311e-07
SSON53G_RS13135	napD	protein NapD	-5.42457	6.24239	1.40688e-07	5.72284e-07
SSON53G_RS10030		hypothetical protein	0.563648	6.23082	1.44588e-07	5.87731e-07
SSON53G_RS30150	hypothetical protein	hypothetical protein	-1.70354	6.22928	1.45207e-07	5.89825e-07
SSON53G_RS00875	fhuD	iron-hydroxamate transporter substrate-binding subunit	1.24799	6.22913	1.4536e-07	5.90029e-07
SSON53G_RS15610		TonB-dependent receptor	1.66676	6.22223	1.47807e-07	5.99471e-07
SSON53G_RS19060	yraP	osmotically-inducible protein OsmY	-0.688446	6.22223	1.47897e-07	5.99471e-07
SSON53G_RS13650	folX	dihydroneopterin triphosphate 2'-epimerase	0.642606	6.22085	1.48475e-07	6.01388e-07
SSON53G_RS11895	yodB	cytochrome b	1.61817	6.2026	1.54956e-07	6.27193e-07
SSON53G_RS02590	folD	bifunctional methylenetetrahydrofolate dehydrogenase/methenyltetrahydrofolate cyclohydrolase	-0.664175	6.19866	1.56478e-07	6.32904e-07
SSON53G_RS22375	lpfD	fimbrial protein	-1.61644	6.19288	1.58689e-07	6.41392e-07
SSON53G_RS18360	yghB	hypothetical protein	0.549908	6.18084	1.63266e-07	6.59422e-07
SSON53G_RS32015	yncD	tonB-dependent receptor yncD	3.34466	6.17813	1.64401e-07	6.63538e-07
SSON53G_RS04225		ABC transporter ATP-binding protein	-1.14938	6.17732	1.64824e-07	6.64776e-07
SSON53G_RS11430	purU	formyltetrahydrofolate deformylase	0.742168	6.16057	1.71427e-07	6.90916e-07
SSON53G_RS03420	kdpC	potassium-transporting ATPase subunit C	1.61302	6.1578	1.72646e-07	6.95339e-07
SSON53G_RS23220	yihX	alpha-D-glucose-1-phosphate phosphatase YihX	0.593443	6.13832	1.80696e-07	7.27247e-07
SSON53G_RS09035	uxaB	altronate oxidoreductase	0.981589	6.13185	1.83537e-07	7.38159e-07
SSON53G_RS20505	glgC	glucose-1-phosphate adenylyltransferase	0.761872	6.12775	1.85407e-07	7.45155e-07
SSON53G_RS05230	yccX	acylphosphatase	0.983888	6.12131	1.88309e-07	7.56286e-07
SSON53G_RS22525	yifE	DUF413 domain-containing protein	-0.675913	6.11831	1.89749e-07	7.61534e-07
SSON53G_RS03740	aroG	3-deoxy-7-phosphoheptulonate synthase	-0.580243	6.1061	1.95297e-07	7.8325e-07
SSON53G_RS21145		DUF937 domain-containing protein	0.9555	6.10602	1.95469e-07	7.83385e-07
SSON53G_RS06430	uvrY	DNA-binding response regulator	-0.738399	6.09186	2.02091e-07	8.09357e-07
SSON53G_RS15585	hypothetical protein	hypothetical protein	1.38854	6.08093	2.07442e-07	8.2998e-07
SSON53G_RS25385		autotransporter assembly complex protein TamB	-0.574919	6.08093	2.07531e-07	8.2998e-07
SSON53G_RS17860		DUF296 domain-containing protein	-6.19114	6.07915	2.0853e-07	8.33389e-07
SSON53G_RS05190	yccF	hypothetical protein	1.04619	6.07183	2.12222e-07	8.47551e-07
SSON53G_RS05780	dinI_1	DNA-damage-inducible protein I	-1.02304	6.05403	2.21258e-07	8.8302e-07
SSON53G_RS23270	fdnG	formate dehydrogenase O subunit alpha, selenocysteine-containing	-0.672753	6.05351	2.21678e-07	8.84078e-07
SSON53G_RS06765		tRNA-Arg	3.04379	6.05028	2.23491e-07	8.90684e-07
SSON53G_RS25120	mutL	DNA mismatch repair protein MutL	-0.513	6.04323	2.27305e-07	9.05251e-07
SSON53G_RS09855	sinR	XRE family transcriptional regulator	1.20491	6.03604	2.31262e-07	9.20369e-07
SSON53G_RS07000	yebF	hypothetical protein	0.835912	6.03457	2.32209e-07	9.23493e-07
SSON53G_RS16790	mutS	DNA mismatch repair protein MutS	-0.702329	6.03017	2.34736e-07	9.32893e-07
SSON53G_RS03385	pgm	alpha-D-glucose phosphate-specific phosphoglucomutase	-0.585525	6.00737	2.47562e-07	9.8318e-07
SSON53G_RS15880	rlmB_2	methyltransferase	-0.659613	6.00464	2.49297e-07	9.89383e-07
SSON53G_RS24050	rsd	Rsd/AlgQ family anti-sigma factor	0.610702	6.00438	2.49618e-07	9.89964e-07
SSON53G_RS19145	truB	tRNA pseudouridine(55) synthase TruB	-0.617253	5.99179	2.5714e-07	1.01909e-06
SSON53G_RS08075	pheS	phenylalanine--tRNA ligase subunit alpha	-0.797243	5.98763	2.59792e-07	1.02888e-06
SSON53G_RS26950	spaN	surface presentation of antigens protein SpaN	-1.7551	5.98694	2.6039e-07	1.03054e-06
SSON53G_RS10910	ymiA	YmiA family putative membrane protein	3.48297	5.97233	2.69482e-07	1.06578e-06
SSON53G_RS13070	ccmH	cytochrome c biogenesis protein CcmH	-1.23287	5.94351	2.88176e-07	1.13892e-06
SSON53G_RS15195	mltF	membrane-bound lytic murein transglycosylase MltF	0.978325	5.93827	2.91873e-07	1.15274e-06
SSON53G_RS09120	dcp	peptidyl-dipeptidase Dcp	0.877879	5.9233	3.02321e-07	1.19317e-06
SSON53G_RS02555		multifunctional acyl-CoA thioesterase I/protease I/lysophospholipase L1	-1.14291	5.92253	3.03067e-07	1.19529e-06
SSON53G_RS14770	dapA	4-hydroxy-tetrahydrodipicolinate synthase	-0.449318	5.9157	3.08082e-07	1.21423e-06
SSON53G_RS06155	iraM	anti-adapter protein IraM	-3.1777	5.91569	3.08299e-07	1.21425e-06
SSON53G_RS22005	cspA	cold-shock protein	0.554652	5.89782	3.21473e-07	1.26526e-06
SSON53G_RS20065	yheT	hydrolase	-0.884821	5.88594	3.30619e-07	1.30036e-06
SSON53G_RS06415	sdiA	transcriptional regulator SdiA	0.639145	5.88116	3.34509e-07	1.31475e-06
SSON53G_RS08045		enterotoxin	2.56657	5.88098	3.34874e-07	1.31528e-06
SSON53G_RS10200		DDE domain-containing protein	0.873184	5.86698	3.46088e-07	1.35839e-06
SSON53G_RS02575	allS_2	transcriptional regulator	0.568049	5.86448	3.4832e-07	1.36621e-06
SSON53G_RS23050		tRNA-Ala	1.12705	5.86365	3.49226e-07	1.36882e-06
SSON53G_RS10715	pspD	phage shock protein D	1.75148	5.84216	3.67195e-07	1.43826e-06
SSON53G_RS10825	hypothetical protein	hypothetical protein	-1.01539	5.81977	3.86892e-07	1.51438e-06
SSON53G_RS26895	mxiK	protein MxiK	-1.816	5.80971	3.96223e-07	1.54983e-06
SSON53G_RS25790	hypothetical protein	hypothetical protein	-1.07856	5.80011	4.05358e-07	1.58448e-06
SSON53G_RS17370	ygdQ	TerC family protein	0.946893	5.79877	4.0689e-07	1.58938e-06
SSON53G_RS12335	udk	uridine kinase	0.998853	5.79064	4.14915e-07	1.61941e-06
SSON53G_RS32260		site-specific integrase	0.895565	5.79064	4.15147e-07	1.61941e-06
SSON53G_RS00435		leu operon leader peptide	0.753101	5.7666	4.39079e-07	1.7116e-06
SSON53G_RS18550	yqiJ	DUF1449 domain-containing protein	1.06085	5.76477	4.41233e-07	1.71882e-06
SSON53G_RS12985		ATP-dependent helicase	-0.981121	5.75573	4.50817e-07	1.75496e-06
SSON53G_RS31580	hypothetical protein	hypothetical protein	-1.23716	5.73989	4.67887e-07	1.82016e-06
SSON53G_RS05810	yceH	DUF480 domain-containing protein	-1.02751	5.73809	4.70153e-07	1.82773e-06
SSON53G_RS26090		patatin family protein	1.12353	5.72609	4.83647e-07	1.87891e-06
SSON53G_RS17670	recJ	single-stranded-DNA-specific exonuclease RecJ	-0.607299	5.70338	5.09961e-07	1.97979e-06
SSON53G_RS03545	gltA	type II citrate synthase	1.03016	5.69406	5.21385e-07	2.02276e-06
SSON53G_RS17395	tas	NADP(H)-dependent aldo-keto reductase	-0.772372	5.68238	5.35952e-07	2.07786e-06
SSON53G_RS07165		MCE family protein	0.563857	5.68123	5.37738e-07	2.08337e-06
SSON53G_RS18325	yghZ	glyceraldehyde 3-phosphate reductase	-0.837912	5.67544	5.45331e-07	2.11135e-06
SSON53G_RS16295		tRNA-Met	0.786817	5.67104	5.51252e-07	2.13283e-06
SSON53G_RS18095	yggX	Fe(2+)-trafficking protein	-0.994015	5.66773	5.55846e-07	2.14915e-06
SSON53G_RS10215		tRNA-Gly	-0.836688	5.65335	5.74953e-07	2.22151e-06
SSON53G_RS17715		6-phospho-beta-glucosidase	-0.973157	5.6475	5.83151e-07	2.25166e-06
SSON53G_RS03430	kdpA	potassium-transporting ATPase subunit KdpA	1.39462	5.64591	5.85683e-07	2.25991e-06
SSON53G_RS20690	yhhL	DUF1145 domain-containing protein	-0.854745	5.64436	5.8817e-07	2.26797e-06
SSON53G_RS14600	eutK	ethanolamine utilization protein EutK	1.337	5.63174	6.05923e-07	2.33485e-06
SSON53G_RS16540	gshA	glutamate--cysteine ligase	0.498871	5.63086	6.07565e-07	2.3396e-06
SSON53G_RS15735		transposase	-1.07838	5.59192	6.65012e-07	2.55908e-06
SSON53G_RS22585	ilvY	LysR family transcriptional regulator	-1.49837	5.5634	7.10616e-07	2.73273e-06
SSON53G_RS22985	tatC	twin-arginine translocase subunit TatC	-0.589469	5.55921	7.17987e-07	2.75922e-06
SSON53G_RS13660		ISNCY family transposase	0.833509	5.55802	7.20442e-07	2.76679e-06
SSON53G_RS04435	iaaA	beta-aspartyl-peptidase	-0.933166	5.55247	7.30207e-07	2.8024e-06
SSON53G_RS15930		23S ribosomal RNA	0.899799	5.53715	7.56939e-07	2.90304e-06
SSON53G_RS08825	cnu_2	nucleoid-associated protein	1.81362	5.51012	8.06077e-07	3.08942e-06
SSON53G_RS27490	wzz	chain-length determining protein	0.593234	5.50965	8.07504e-07	3.09281e-06
SSON53G_RS21265	yidF	radical SAM protein	-0.652386	5.50874	8.09729e-07	3.09925e-06
SSON53G_RS13790	yfcN	endonuclease SmrB	-0.71472	5.50458	8.18079e-07	3.12911e-06
SSON53G_RS23715		IS21 family transposase	1.47029	5.50009	8.2713e-07	3.16161e-06
SSON53G_RS26945	spaM	surface presentation of antigens protein SpaM	-2.80622	5.49898	8.29814e-07	3.16974e-06
SSON53G_RS20220	trpS	tryptophan--tRNA ligase	-0.818073	5.4802	8.67064e-07	3.30982e-06
SSON53G_RS20305	hslO	redox-regulated molecular chaperone Hsp33	0.582167	5.47571	8.76646e-07	3.34416e-06
SSON53G_RS14605	eutL	ethanolamine utilization microcompartment protein EutL	1.96223	5.46918	8.90524e-07	3.39483e-06
SSON53G_RS01125	metN	methionine import ATP-binding protein MetN	0.919509	5.44259	9.47398e-07	3.60923e-06
SSON53G_RS25075	rsgA	ribosome small subunit-dependent GTPase	-0.613375	5.42224	9.93499e-07	3.78232e-06
SSON53G_RS28735	hypothetical protein	hypothetical protein	1.30146	5.41754	1.00499e-06	3.82353e-06
SSON53G_RS16885	ftsB	cell division protein FtsB	0.837437	5.41598	1.00927e-06	3.83725e-06
SSON53G_RS23150	glnL	two-component system sensor histidine kinase NtrB	-0.85357	5.40909	1.0261e-06	3.89862e-06
SSON53G_RS21690	coaD	phosphopantetheine adenylyltransferase	-0.701987	5.40131	1.04533e-06	3.96906e-06
SSON53G_RS23040		16S ribosomal RNA	1.25009	5.38482	1.08652e-06	4.1227e-06
SSON53G_RS32990		glycosyl transferase	1.23365	5.37918	1.10202e-06	4.17659e-06
SSON53G_RS10710	pspE	thiosulfate sulfurtransferase PspE	-0.731989	5.37918	1.10219e-06	4.17659e-06
SSON53G_RS00160	ileS	isoleucine--tRNA ligase	-0.554689	5.37545	1.11242e-06	4.21258e-06
SSON53G_RS16550	yqaB	fructose-1-phosphate/6-phosphogluconate phosphatase	-0.696993	5.36797	1.13252e-06	4.28583e-06
SSON53G_RS20560	gntR_2	transcriptional regulator	-0.602973	5.35639	1.16387e-06	4.40156e-06
SSON53G_RS20785	ybhF_1	ABC transporter ATP-binding protein/permease	-0.998582	5.3493	1.18382e-06	4.47404e-06
SSON53G_RS03120	mrdA	penicillin-binding protein 2	0.600362	5.34734	1.18995e-06	4.49423e-06
SSON53G_RS25145	hflC	protease modulator HflC	-0.474608	5.34164	1.20649e-06	4.55366e-06
SSON53G_RS15085	hcaR	LysR family transcriptional regulator	1.51466	5.33815	1.21701e-06	4.59035e-06
SSON53G_RS02330	amtB	ammonia channel	1.15648	5.33675	1.22175e-06	4.60517e-06
SSON53G_RS14145		hypothetical protein	0.642794	5.33288	1.23351e-06	4.64643e-06
SSON53G_RS07195		MFS transporter	1.68254	5.33212	1.23649e-06	4.65459e-06
SSON53G_RS05620		IS21 family transposase	1.38609	5.32093	1.26959e-06	4.77603e-06
SSON53G_RS05320		YjbH domain-containing protein	-0.608195	5.32006	1.27299e-06	4.78569e-06
SSON53G_RS22595	ppiC	peptidyl-prolyl cis-trans isomerase	-0.539415	5.31879	1.27754e-06	4.79962e-06
SSON53G_RS18455	yqiA	esterase YqiA	-0.674242	5.31464	1.29065e-06	4.84569e-06
SSON53G_RS20495	glgP	glycogen phosphorylase	0.480563	5.31361	1.29458e-06	4.85724e-06
SSON53G_RS13585	yfbR	5'-deoxynucleotidase	-1.05135	5.30839	1.31109e-06	4.91594e-06
SSON53G_RS32520		transcriptional regulator	1.2012	5.28621	1.38071e-06	5.17358e-06
SSON53G_RS21060	yfbT_3	6-phosphogluconate phosphatase	-0.970591	5.28507	1.38614e-06	5.18715e-06
SSON53G_RS17745	ubiH	2-octaprenyl-6-methoxyphenyl hydroxylase	-0.702093	5.28507	1.38615e-06	5.18715e-06
SSON53G_RS24235		hypothetical protein	-0.84515	5.2823	1.39595e-06	5.22039e-06
SSON53G_RS07355	caiT_1	BCCT family transporter	1.8393	5.27863	1.4087e-06	5.26463e-06
SSON53G_RS05350		cold-shock protein CspG	0.469804	5.27771	1.41261e-06	5.27578e-06
SSON53G_RS14900	ppk1	polyphosphate kinase	-0.461828	5.27611	1.41875e-06	5.29525e-06
SSON53G_RS22680	rffC	dTDP-4-amino-4,6-dideoxy-D-galactose acyltransferase	-0.957193	5.2692	1.44247e-06	5.38024e-06
SSON53G_RS20075	cfxP	phosphoribulokinase	-0.77525	5.24744	1.51758e-06	5.6567e-06
SSON53G_RS01175	yafD	EEP domain-containing protein	0.64088	5.24204	1.53754e-06	5.72738e-06
SSON53G_RS22025	yiaD	OmpA family lipoprotein	-0.996695	5.23488	1.56413e-06	5.82262e-06
SSON53G_RS00040		sodium:alanine symporter family protein	-1.05813	5.2305	1.58102e-06	5.88162e-06
SSON53G_RS14420	gltX	glutamate--tRNA ligase	-0.563838	5.21054	1.65647e-06	6.15831e-06
SSON53G_RS11190	dpnA	site-specific DNA-methyltransferase	1.10729	5.20752	1.66912e-06	6.20131e-06
SSON53G_RS05235	yccK	sulfurtransferase TusE	0.884737	5.19362	1.72453e-06	6.40299e-06
SSON53G_RS02110	thiL	thiamine-phosphate kinase	0.742073	5.1908	1.73687e-06	6.44462e-06
SSON53G_RS00940	yaeH	hypothetical protein	-0.446652	5.18192	1.77391e-06	6.57777e-06
SSON53G_RS19275		acid stress protein IbaG	0.838189	5.17779	1.79205e-06	6.6407e-06
SSON53G_RS06060	lolD_1	lipoprotein-releasing system ATP-binding protein LolD	-1.12203	5.16626	1.84142e-06	6.81923e-06
SSON53G_RS02520	ybbI	transcriptional regulator	0.799671	5.1591	1.87325e-06	6.93262e-06
SSON53G_RS10495	hypothetical protein	hypothetical protein	-5.70567	5.15649	1.88577e-06	6.97442e-06
SSON53G_RS12860	psuK_2	carbohydrate kinase	-0.793164	5.15388	1.89838e-06	7.0165e-06
SSON53G_RS17420	lysR	LysR family transcriptional regulator	-1.16331	5.13814	1.96974e-06	7.27552e-06
SSON53G_RS22390	pstA	phosphate ABC transporter, permease protein PstA	-1.37412	5.13053	2.00586e-06	7.40414e-06
SSON53G_RS00320	pdxA	4-hydroxythreonine-4-phosphate dehydrogenase	-0.603687	5.12963	2.01131e-06	7.41947e-06
SSON53G_RS07885	xth	exodeoxyribonuclease III	0.794172	5.12799	2.02019e-06	7.44742e-06
SSON53G_RS19940	rplW	50S ribosomal protein L23	-0.508091	5.10868	2.11342e-06	7.78607e-06
SSON53G_RS22250		LysR family transcriptional regulator	-1.3843	5.10707	2.12266e-06	7.81507e-06
SSON53G_RS26905	hypothetical protein	hypothetical protein	-3.1766	5.10328	2.14266e-06	7.8836e-06
SSON53G_RS05195	helD	DNA helicase IV	-0.742278	5.09049	2.20811e-06	8.11917e-06
SSON53G_RS27235		transposase	0.812727	5.05536	2.39567e-06	8.80315e-06
SSON53G_RS09195		transcriptional regulator	0.4155	5.05506	2.39889e-06	8.80931e-06
SSON53G_RS22675	rfbA	glucose-1-phosphate thymidylyltransferase	-0.825438	5.05384	2.40717e-06	8.83403e-06
SSON53G_RS17700	ygfZ	tRNA-modifying protein YgfZ	-0.596642	5.039	2.49245e-06	9.14111e-06
SSON53G_RS03755	galK	galactokinase	-1.00161	5.03838	2.49764e-06	9.15429e-06
SSON53G_RS13535	nuoH	NADH-quinone oxidoreductase subunit H	-0.83909	5.03138	2.53986e-06	9.30302e-06
SSON53G_RS27795	hypothetical protein	hypothetical protein	-1.24658	5.02334	2.58892e-06	9.47665e-06
SSON53G_RS08755	tyrS	tyrosine--tRNA ligase	-0.570592	5.01732	2.6268e-06	9.60912e-06
SSON53G_RS06505	yecI	non-heme ferritin	-0.649572	4.99791	2.74861e-06	1.00483e-05
SSON53G_RS11555	lolB	outer membrane lipoprotein LolB	1.07346	4.99277	2.7831e-06	1.01679e-05
SSON53G_RS05385	torR	two-component system response regulator TorR	-0.760106	4.97747	2.88473e-06	1.05324e-05
SSON53G_RS04810	dmsB_2	dimethyl sulfoxide reductase subunit B	-2.27766	4.96611	2.96308e-06	1.08115e-05
SSON53G_RS13415	arnE	4-amino-4-deoxy-L-arabinose-phosphoundecaprenol flippase subunit ArnE	1.33662	4.96011	3.00621e-06	1.09619e-05
SSON53G_RS00470	mraZ	division/cell wall cluster transcriptional repressor MraZ	-0.435922	4.95743	3.02681e-06	1.103e-05
SSON53G_RS23390		transcriptional regulator	-1.78438	4.95657	3.03474e-06	1.10518e-05
SSON53G_RS31630		glycosyl transferase	1.48061	4.94986	3.08391e-06	1.12237e-05
SSON53G_RS13520	nuoK	NADH-quinone oxidoreductase subunit K	-0.853674	4.9474	3.10341e-06	1.12875e-05
SSON53G_RS20695	yhhM	DUF2500 domain-containing protein	-1.13044	4.94722	3.10669e-06	1.12922e-05
SSON53G_RS06650	cutC	copper homeostasis protein CutC	0.496396	4.93687	3.18364e-06	1.15645e-05
SSON53G_RS27915		RtT sRNA	1.22894	4.932	3.22162e-06	1.1695e-05
SSON53G_RS09810	ydcV	ABC transporter permease	2.25815	4.93047	3.235e-06	1.17362e-05
SSON53G_RS23805	fsaB	fructose-6-phosphate aldolase	-2.72742	4.92839	3.25263e-06	1.17926e-05
SSON53G_RS21695	waaA	3-deoxy-D-manno-octulosonic acid transferase	0.724996	4.91786	3.33455e-06	1.20819e-05
SSON53G_RS26155	radA	DNA repair protein RadA	-0.68434	4.91755	3.33907e-06	1.20906e-05
SSON53G_RS27600	pgtE	outer membrane protease PgtE	-1.55732	4.91522	3.35922e-06	1.21558e-05
SSON53G_RS33255	hypothetical protein	hypothetical protein	-1.07092	4.91346	3.37499e-06	1.22052e-05
SSON53G_RS26145	ytjB	protein Smp	-1.16021	4.90197	3.4676e-06	1.25321e-05
SSON53G_RS12685	yehW	osmoprotectant uptake system permease	1.28673	4.90071	3.47989e-06	1.25686e-05
SSON53G_RS16460	hypothetical protein	hypothetical protein	1.36811	4.87348	3.70745e-06	1.3382e-05
SSON53G_RS20320	pckA	phosphoenolpyruvate carboxykinase (ATP)	-0.783074	4.8572	3.85151e-06	1.38932e-05
SSON53G_RS26980	hypothetical protein	hypothetical protein	-3.93573	4.84457	3.96769e-06	1.43032e-05
SSON53G_RS06145	rluE	23S rRNA pseudouridine synthase E	1.11901	4.84219	3.99196e-06	1.43817e-05
SSON53G_RS06025	ycfJ	glycine zipper 2TM domain-containing protein	1.16406	4.8396	4.01835e-06	1.44676e-05
SSON53G_RS09955	trg	HAMP domain-containing protein	1.0621	4.83796	4.03616e-06	1.45225e-05
SSON53G_RS14550	murQ	N-acetylmuramic acid 6-phosphate etherase	-1.00982	4.82569	4.15437e-06	1.49385e-05
SSON53G_RS19055	diaA	DnaA initiator-associating protein DiaA	-0.625607	4.82123	4.19997e-06	1.50929e-05
SSON53G_RS21150	yidA	sugar phosphatase YidA	-0.720949	4.8096	4.31666e-06	1.55025e-05
SSON53G_RS03310	nagD	ribonucleotide monophosphatase NagD	-0.614859	4.80163	4.39933e-06	1.57894e-05
SSON53G_RS04855	pflA	pyruvate formate lyase-activating protein	-0.799346	4.79781	4.441e-06	1.59289e-05
SSON53G_RS25465	treR	HTH-type transcriptional regulator TreR	-0.855657	4.79759	4.44606e-06	1.59371e-05
SSON53G_RS04670		DUF2867 domain-containing protein	-0.646482	4.79565	4.46874e-06	1.60083e-05
SSON53G_RS12170		LysR family transcriptional regulator	0.565	4.79543	4.47385e-06	1.60166e-05
SSON53G_RS17120	rumA	23S rRNA (uracil(1939)-C(5))-methyltransferase RlmD	-0.69003	4.79317	4.50002e-06	1.61001e-05
SSON53G_RS00990	yaeS	(2E,6E)-farnesyl-diphosphate-specific ditrans,polycis-undecaprenyl-diphosphate synthase	0.55597	4.78867	4.54975e-06	1.62678e-05
SSON53G_RS13785		50S ribosomal protein L3 N(5)-glutamine methyltransferase	-0.597912	4.77665	4.68041e-06	1.67246e-05
SSON53G_RS13035		IS21 family transposase	1.49878	4.746	5.02571e-06	1.79472e-05
SSON53G_RS31825		glycosyl transferase	1.65074	4.74494	5.04118e-06	1.79912e-05
SSON53G_RS03290		tRNA-Met	1.23222	4.74381	5.05755e-06	1.80383e-05
SSON53G_RS00555	secA	protein translocase subunit SecA	-0.489809	4.73997	5.10563e-06	1.81984e-05
SSON53G_RS20730	tqsA	AI-2E family transporter	1.03311	4.73786	5.13364e-06	1.82868e-05
SSON53G_RS25340	cpdB	2',3'-cyclic-nucleotide 2'-phosphodiesterase	-0.750572	4.72954	5.2362e-06	1.86405e-05
SSON53G_RS24975	groEL	molecular chaperone GroEL	0.493394	4.72462	5.29917e-06	1.88529e-05
SSON53G_RS32675		protein YrbN	0.980459	4.7237	5.31373e-06	1.88929e-05
SSON53G_RS31585		transposase	2.33188	4.71631	5.40835e-06	1.92173e-05
SSON53G_RS15805	rseA	anti-sigma-E factor RseA	0.381637	4.7162	5.41302e-06	1.92219e-05
SSON53G_RS21420	hypothetical protein	hypothetical protein	1.18424	4.71574	5.42219e-06	1.92425e-05
SSON53G_RS21295	ilvB	acetolactate synthase, large subunit, biosynthetic type	0.560602	4.71109	5.48391e-06	1.94495e-05
SSON53G_RS00830		tRNA glutamyl-Q(34) synthetase GluQRS	0.804182	4.71087	5.49194e-06	1.94594e-05
SSON53G_RS13100		heme exporter protein B	-1.43234	4.71087	5.49353e-06	1.94594e-05
SSON53G_RS21015	treF	trehalase	0.874026	4.7066	5.55128e-06	1.96517e-05
SSON53G_RS24095	zraR_1	two-component system response regulator ZraR	-1.55086	4.70643	5.5569e-06	1.96594e-05
SSON53G_RS11975		AMP nucleosidase	-0.526368	4.7033	5.60056e-06	1.98016e-05
SSON53G_RS02950	dsbG	thiol:disulfide interchange protein DsbG	1.14329	4.70063	5.63863e-06	1.99238e-05
SSON53G_RS22615	rep	DNA helicase Rep	0.615842	4.69629	5.69874e-06	2.01238e-05
SSON53G_RS07015	ptrB	oligopeptidase B	0.777277	4.69111	5.77065e-06	2.03651e-05
SSON53G_RS13680	hisJ	histidine ABC transporter substrate-binding protein HisJ	0.5948	4.67344	6.01403e-06	2.12109e-05
SSON53G_RS05245		tRNA-Ser	1.20865	4.67305	6.02317e-06	2.123e-05
SSON53G_RS21115	rpmH	50S ribosomal protein L34	-0.778389	4.67084	6.05771e-06	2.13385e-05
SSON53G_RS09700		RHS repeat protein	1.072	4.65748	6.25073e-06	2.20049e-05
SSON53G_RS00340	rluA	bifunctional tRNA pseudouridine(32) synthase/ribosomal large subunit pseudouridine synthase RluA	-0.529338	4.65709	6.2602e-06	2.20246e-05
SSON53G_RS02565		ABC transporter permease	0.826869	4.63444	6.59947e-06	2.32039e-05
SSON53G_RS19345	ptsN	PTS IIA-like nitrogen regulatory protein PtsN	-0.579821	4.62902	6.68648e-06	2.34954e-05
SSON53G_RS04875	yetF	DUF421 domain-containing protein	1.35769	4.62841	6.69995e-06	2.35282e-05
SSON53G_RS11465	narK	nitrate/nitrite transporter NarK	-1.23512	4.62135	6.81399e-06	2.39139e-05
SSON53G_RS32690		hypothetical protein	-0.655912	4.61975	6.84336e-06	2.40023e-05
SSON53G_RS10885	ribA	GTP cyclohydrolase II	-0.580207	4.61787	6.87732e-06	2.41065e-05
SSON53G_RS16440	stpA	DNA-binding protein StpA	-1.0425	4.60718	7.05293e-06	2.47069e-05
SSON53G_RS19995	fusA	elongation factor G	-0.53246	4.60683	7.06303e-06	2.47271e-05
SSON53G_RS13510	nuoM	NADH-quinone oxidoreductase subunit M	-0.576609	4.60452	7.10493e-06	2.48585e-05
SSON53G_RS22580	ilvA	threonine ammonia-lyase, biosynthetic	-0.762549	4.60185	7.15324e-06	2.50122e-05
SSON53G_RS16545	yqaA	DedA family protein	-0.681944	4.60114	7.16923e-06	2.50528e-05
SSON53G_RS25325	ytfF	EamA/RhaT family transporter	0.653598	4.59958	7.19958e-06	2.51434e-05
SSON53G_RS14275	frc_2	formyl-CoA--oxalate CoA-transferase	2.9381	4.59824	7.22616e-06	2.52208e-05
SSON53G_RS20240	damX	protein DamX	-0.564359	4.59513	7.28258e-06	2.54022e-05
SSON53G_RS24830	yjdI	4Fe-4S mono-cluster protein YjdI	1.62072	4.59453	7.29707e-06	2.54371e-05
SSON53G_RS21605	rpoZ	DNA-directed RNA polymerase subunit omega	0.371343	4.59308	7.32594e-06	2.55222e-05
SSON53G_RS14340		phosphoenolpyruvate--protein phosphotransferase	-0.484215	4.59117	7.36268e-06	2.56345e-05
SSON53G_RS19445	sspA	stringent starvation protein A	-0.686593	4.57538	7.64011e-06	2.65842e-05
SSON53G_RS09445	yddA	ABC transporter ATP-binding protein/permease	1.64692	4.57122	7.7182e-06	2.68396e-05
SSON53G_RS16765	hypC2	hydrogenase assembly protein HypC	-3.33398	4.55336	8.04721e-06	2.79666e-05
SSON53G_RS33210		IS1 family transposase	-0.764113	4.54188	8.26789e-06	2.87161e-05
SSON53G_RS29295	hypothetical protein	hypothetical protein	3.55788	4.53778	8.35137e-06	2.89883e-05
SSON53G_RS11350	cls	cardiolipin synthase A	-0.504921	4.53375	8.43433e-06	2.92585e-05
SSON53G_RS02380	acrB_1	multidrug efflux RND transporter permease subunit	-0.44106	4.53322	8.44976e-06	2.92942e-05
SSON53G_RS07235	rrmA	23S rRNA (guanine(745)-N(1))-methyltransferase	0.644484	4.53314	8.45648e-06	2.92997e-05
SSON53G_RS24370	lexA	LexA repressor	-0.603138	4.53135	8.49648e-06	2.94204e-05
SSON53G_RS04425	moeB	molybdopterin-synthase adenylyltransferase MoeB	-0.783755	4.53076	8.51322e-06	2.94605e-05
SSON53G_RS23995	rplA	50S ribosomal protein L1	-0.614236	4.51531	8.82681e-06	3.05272e-05
SSON53G_RS04545	ybjM	hypothetical protein	-2.145	4.51153	8.90943e-06	3.07942e-05
SSON53G_RS04495	yliJ	glutathione S-transferase family protein	0.89189	4.50157	9.12156e-06	3.15083e-05
SSON53G_RS27985		IS3 family transposase	0.957284	4.49819	9.19846e-06	3.17547e-05
SSON53G_RS14155		IS21 family transposase	1.35516	4.49666	9.23645e-06	3.18666e-05
SSON53G_RS12725	yohD	DedA family protein	0.720834	4.48669	9.45666e-06	3.26066e-05
SSON53G_RS02865	fepG	iron-enterobactin transporter permease	-0.734644	4.48395	9.5223e-06	3.28131e-05
SSON53G_RS08460	aroD	3-dehydroquinase	-0.846115	4.47399	9.7491e-06	3.35743e-05
SSON53G_RS00675		PulS family protein	0.549582	4.46538	9.95037e-06	3.42468e-05
SSON53G_RS22150	bcsG	cellulose biosynthesis protein BcsG	-1.10042	4.46534	9.95721e-06	3.42497e-05
SSON53G_RS20740	nikA	nickel ABC transporter, nickel/metallophore periplasmic binding protein	-1.27359	4.46268	1.00244e-05	3.44601e-05
SSON53G_RS30575	hypothetical protein	hypothetical protein	-1.11834	4.45234	1.02723e-05	3.52911e-05
SSON53G_RS22640	rho	transcription termination factor Rho	0.393847	4.44925	1.03518e-05	3.55427e-05
SSON53G_RS04860	pflB2	formate acetyltransferase 1	-0.640193	4.44221	1.05272e-05	3.61233e-05
SSON53G_RS17280		tRNA-Met	1.01907	4.43633	1.06837e-05	3.6616e-05
SSON53G_RS11460	narG	nitrate reductase subunit alpha	-1.3073	4.43633	1.06795e-05	3.6616e-05
SSON53G_RS06835		invasion plasmid antigen	-1.1438	4.43344	1.07613e-05	3.686e-05
SSON53G_RS05895	rne	ribonuclease E	-0.349869	4.41857	1.1143e-05	3.81443e-05
SSON53G_RS22050	tag	DNA-3-methyladenine glycosylase I	-1.27588	4.41835	1.11561e-05	3.81635e-05
SSON53G_RS17965	gshB	glutathione synthetase	-0.699099	4.41835	1.1162e-05	3.81635e-05
SSON53G_RS16665	hypF	carbamoyltransferase HypF	-1.25534	4.40668	1.14728e-05	3.92027e-05
SSON53G_RS10750	puuC	aldehyde dehydrogenase PuuC	1.05349	4.40132	1.16224e-05	3.96901e-05
SSON53G_RS26615	hypothetical protein	hypothetical protein	1.09445	4.39611	1.17697e-05	4.01693e-05
SSON53G_RS25895	hpaC	4-hydroxyphenylacetate 3-monooxygenase reductase component	-1.1993	4.38887	1.19746e-05	4.0844e-05
SSON53G_RS05290	appB	cytochrome bd-II ubiquinol oxidase subunit 2	1.31649	4.38743	1.20216e-05	4.09797e-05
SSON53G_RS04525	ybjI	HAD family hydrolase	-1.11527	4.37948	1.22511e-05	4.17372e-05
SSON53G_RS16575		tRNA-Ser	-0.97719	4.3668	1.2625e-05	4.29737e-05
SSON53G_RS08560	fumD	hypothetical protein	0.698779	4.3668	1.26291e-05	4.29737e-05
SSON53G_RS21745	rfaC	lipopolysaccharide heptosyltransferase RfaC	-0.866939	4.36176	1.27842e-05	4.34754e-05
SSON53G_RS14960	yfgL	outer membrane protein assembly factor BamB	-0.4068	4.3606	1.2826e-05	4.35915e-05
SSON53G_RS06325	cvrA	K+/H+ antiporter NhaP2	-0.49814	4.35824	1.29034e-05	4.38287e-05
SSON53G_RS25665		DDE domain-containing protein	0.60325	4.35383	1.3043e-05	4.42764e-05
SSON53G_RS14730	dapE	succinyl-diaminopimelate desuccinylase	-0.661652	4.35162	1.31211e-05	4.45017e-05
SSON53G_RS08720	yiaV	HlyD family secretion protein	1.06567	4.35162	1.3125e-05	4.45017e-05
SSON53G_RS31765		hypothetical protein	0.881917	4.34917	1.32071e-05	4.47535e-05
SSON53G_RS12565	molR_1	molybdenum metabolism regulator	1.20362	4.34867	1.32303e-05	4.48055e-05
SSON53G_RS32010		glycosyl transferase	1.35545	4.34794	1.32604e-05	4.48806e-05
SSON53G_RS05105	pyrD	dihydroorotate dehydrogenase (quinone)	0.673883	4.34375	1.33968e-05	4.53154e-05
SSON53G_RS14985	rlmN	bifunctional tRNA (adenosine(37)-C2)-methyltransferase TrmG/ribosomal RNA large subunit methyltransferase RlmN	0.526491	4.34012	1.35174e-05	4.56965e-05
SSON53G_RS24230	rluF	23S rRNA pseudouridine synthase F	0.781459	4.33866	1.35709e-05	4.58502e-05
SSON53G_RS13205	atoS	two-component system sensor histidine kinase AtoS	-1.22068	4.33513	1.36899e-05	4.62246e-05
SSON53G_RS01640	betI	transcriptional regulator BetI	0.877634	4.33092	1.38313e-05	4.66744e-05
SSON53G_RS33215		glycosyl transferase	0.815305	4.32525	1.40215e-05	4.72884e-05
SSON53G_RS02120		aldo/keto reductase	0.789318	4.31441	1.43842e-05	4.8483e-05
SSON53G_RS08675		ATP-dependent helicase	0.638032	4.31209	1.447e-05	4.87433e-05
SSON53G_RS16890	ygbE	hypothetical protein	1.39671	4.30461	1.47298e-05	4.95893e-05
SSON53G_RS01135		16S ribosomal RNA	1.06165	4.29938	1.4917e-05	5.01898e-05
SSON53G_RS30875		YhcH/YjgK/YiaL family protein	-1.78682	4.29901	1.49385e-05	5.02325e-05
SSON53G_RS09965		periplasmic protein	1.12381	4.29663	1.50298e-05	5.05097e-05
SSON53G_RS24745	adiY	transcriptional regulator	-1.67762	4.29214	1.51949e-05	5.10345e-05
SSON53G_RS05655	hypothetical protein	hypothetical protein	2.38677	4.29163	1.52217e-05	5.10943e-05
SSON53G_RS07215		hypothetical protein	-0.68884	4.28308	1.55333e-05	5.21096e-05
SSON53G_RS29685	hypothetical protein	hypothetical protein	1.91613	4.27614	1.5793e-05	5.29499e-05
SSON53G_RS10830	rnb	exoribonuclease 2	-0.421754	4.27169	1.5965e-05	5.3495e-05
SSON53G_RS18400	sufI	cell division protein FtsP	-0.540269	4.27152	1.59805e-05	5.35155e-05
SSON53G_RS17950	sprT	SprT family protein	1.52792	4.27048	1.60282e-05	5.36436e-05
SSON53G_RS18105	nupG	nucleoside permease NupG	0.682331	4.26885	1.60979e-05	5.38452e-05
SSON53G_RS08055	infC	translation initiation factor IF-3	0.400667	4.26875	1.61111e-05	5.38579e-05
SSON53G_RS11630		lipoprotein	-0.741874	4.26462	1.62745e-05	5.43722e-05
SSON53G_RS04955	kdsB	3-deoxy-manno-octulosonate cytidylyltransferase	-0.610766	4.26004	1.64569e-05	5.49496e-05
SSON53G_RS17315	ppdC	prepilin-type cleavage/methylation domain-containing protein	-2.33296	4.25732	1.657e-05	5.52947e-05
SSON53G_RS29370	hypothetical protein	hypothetical protein	3.32013	4.25544	1.66515e-05	5.55343e-05
SSON53G_RS02760	cusR	DNA-binding response regulator	-1.23304	4.25364	1.67304e-05	5.57647e-05
SSON53G_RS10525	fnr	transcriptional regulator FNR	0.41344	4.24861	1.69351e-05	5.64139e-05
SSON53G_RS19750		DUF1488 domain-containing protein	-0.906928	4.23759	1.73807e-05	5.78645e-05
SSON53G_RS16145	rplS	50S ribosomal protein L19	-0.443414	4.23233	1.76027e-05	5.85697e-05
SSON53G_RS31400	hypothetical protein	hypothetical protein	2.45498	4.22497	1.7914e-05	5.95707e-05
SSON53G_RS21595	trmH	tRNA (guanosine(18)-2'-O)-methyltransferase TrmH	-0.635099	4.22448	1.79448e-05	5.96382e-05
SSON53G_RS20105	pabA	aminodeoxychorismate synthase component 2	1.59034	4.21337	1.84202e-05	6.11827e-05
SSON53G_RS24285	yjbA	phosphate-starvation-inducible protein PsiE	-0.876947	4.20792	1.86638e-05	6.19557e-05
SSON53G_RS02185		N-acetyltransferase	-0.776226	4.20165	1.89464e-05	6.28571e-05
SSON53G_RS01405	gmhA	phosphoheptose isomerase	-0.478198	4.19613	1.91999e-05	6.3661e-05
SSON53G_RS26340	ospF	phosphothreonine lyase OspF	-1.1136	4.19107	1.94359e-05	6.44061e-05
SSON53G_RS33010		transposase	1.62361	4.18948	1.95186e-05	6.46426e-05
SSON53G_RS18860	elaB_2	DUF883 domain-containing protein	0.764683	4.1833	1.98099e-05	6.55692e-05
SSON53G_RS12950	appA_1	ABC transporter substrate-binding protein	-0.557775	4.18047	1.99509e-05	6.59978e-05
SSON53G_RS22070		tRNA-Pro	1.07336	4.16353	2.07565e-05	6.86229e-05
SSON53G_RS17530		tRNA-Gly	-1.34027	4.16265	2.08108e-05	6.87623e-05
SSON53G_RS14860	yhhT	AI-2E family transporter	0.642363	4.16167	2.087e-05	6.89182e-05
SSON53G_RS28840	hypothetical protein	hypothetical protein	1.96326	4.16081	2.09287e-05	6.90538e-05
SSON53G_RS05510	putP	sodium/proline symporter PutP	0.935849	4.16081	2.09353e-05	6.90538e-05
SSON53G_RS21305	uhpA	DNA-binding response regulator	1.13663	4.15555	2.12028e-05	6.98957e-05
SSON53G_RS18705	ebgA_1	beta-galactosidase subunit alpha	1.07911	4.15437	2.12728e-05	7.0086e-05
SSON53G_RS10475		glutamate decarboxylase	0.754721	4.15361	2.13223e-05	7.02084e-05
SSON53G_RS21730	waaW	UDP-galactose--(galactosyl) LPS alpha1,2-galactosyltransferase	0.514921	4.15305	2.13623e-05	7.02996e-05
SSON53G_RS15910		lipoprotein	-0.991719	4.14986	2.15319e-05	7.08167e-05
SSON53G_RS27450		E3 ubiquitin--protein ligase	-0.869485	4.14576	2.17488e-05	7.14891e-05
SSON53G_RS13395	arnC	undecaprenyl-phosphate 4-deoxy-4-formamido-L-arabinose transferase	1.16984	4.14421	2.18392e-05	7.17448e-05
SSON53G_RS20880	arsB	arsenical efflux pump membrane protein ArsB	-1.42579	4.1408	2.20238e-05	7.23095e-05
SSON53G_RS27945		RNase P RNA component class A	-0.613326	4.1385	2.21538e-05	7.26945e-05
SSON53G_RS00535	ftsA	cell division protein FtsA	-0.482355	4.13447	2.23732e-05	7.33722e-05
SSON53G_RS13795		DUF2544 domain-containing protein	0.763023	4.13118	2.25563e-05	7.39301e-05
SSON53G_RS05300	appA_2	periplasmic AppA protein	1.13065	4.12926	2.26723e-05	7.42568e-05
SSON53G_RS06365	fliC-SS(a)	flagellin FliC	0.850399	4.12926	2.2682e-05	7.42568e-05
SSON53G_RS10250		hypothetical protein	-0.846342	4.1231	2.30192e-05	7.53176e-05
SSON53G_RS25330	qorB	NAD(P)-dependent oxidoreductase	-1.41011	4.11719	2.3348e-05	7.63495e-05
SSON53G_RS12810		DUF418 family protein	0.536677	4.11608	2.34215e-05	7.65461e-05
SSON53G_RS06905		zinc ABC transporter substrate-binding protein	-0.480458	4.08995	2.48883e-05	8.12932e-05
SSON53G_RS00900	yicG_1	hypothetical protein	0.76007	4.08981	2.49106e-05	8.13194e-05
SSON53G_RS27175		N-acetylmuramoyl-L-alanine amidase	0.605114	4.08358	2.52848e-05	8.24939e-05
SSON53G_RS12605		two-component system response regulator YehT	-0.979985	4.06376	2.64804e-05	8.63451e-05
SSON53G_RS03095	lipB	octanoyltransferase	0.981602	4.06234	2.65823e-05	8.6628e-05
SSON53G_RS20900		IS21 family transposase	1.2873	4.05681	2.69386e-05	8.77389e-05
SSON53G_RS19945	rplD	50S ribosomal protein L4	-0.473286	4.05377	2.71434e-05	8.83555e-05
SSON53G_RS01145		tRNA-Ala	1.16262	4.05182	2.72808e-05	8.87521e-05
SSON53G_RS32660		glycosyl transferase	1.1311	4.05032	2.73907e-05	8.90588e-05
SSON53G_RS05805	rimJ	30S ribosomal protein S5 alanine N-acetyltransferase	-0.745011	4.04308	2.78673e-05	9.05568e-05
SSON53G_RS32460		glycosyl transferase	1.61216	4.04249	2.79211e-05	9.068e-05
SSON53G_RS30580	hypothetical protein	hypothetical protein	-1.03872	4.02764	2.89085e-05	9.38332e-05
SSON53G_RS06500		DUF2766 domain-containing protein	0.707327	4.02667	2.89896e-05	9.40432e-05
SSON53G_RS18875		DoxX family protein	0.856189	4.02382	2.91974e-05	9.46632e-05
SSON53G_RS23435	hypothetical protein	hypothetical protein	-1.06128	4.02088	2.94125e-05	9.53065e-05
SSON53G_RS19200	secG	protein-export membrane protein SecG	0.73768	4.02078	2.94361e-05	9.53288e-05
SSON53G_RS18555	yqiK_2	flotillin family protein	-1.17862	4.01963	2.95306e-05	9.55805e-05
SSON53G_RS02855	fepE	LPS O-antigen length regulator	1.96546	4.01698	2.97284e-05	9.61663e-05
SSON53G_RS05110	zapC	cell division protein ZapC	0.89275	4.01419	2.99371e-05	9.67864e-05
SSON53G_RS21250	yidI	hypothetical protein	-1.16524	4.01171	3.01255e-05	9.73404e-05
SSON53G_RS15035	hscB	co-chaperone protein HscB	0.54806	4.00921	3.03163e-05	9.79015e-05
SSON53G_RS18435	qseC	two-component sensor histidine kinase	-0.882491	4.00723	3.0472e-05	9.83484e-05
SSON53G_RS19105	yhbV	U32 family peptidase	-1.23607	4.00237	3.08329e-05	9.94569e-05
SSON53G_RS22045	yiaC	N-acetyltransferase	-0.842495	4.00029	3.0998e-05	9.9933e-05
SSON53G_RS05770	solA	N-methyl-L-tryptophan oxidase	-0.563087	3.99733	3.1228e-05	0.000100618
SSON53G_RS14525	cysW	sulfate ABC transporter permease	0.774065	3.99385	3.1497e-05	0.000101427
SSON53G_RS12150		exodeoxyribonuclease I	-0.56571	3.98486	3.21738e-05	0.000103548
SSON53G_RS19935	rplB	50S ribosomal protein L2	-0.570532	3.97877	3.26461e-05	0.000105009
SSON53G_RS01425	dinJ	type II toxin-antitoxin system antitoxin DinJ	0.666094	3.97439	3.2996e-05	0.000106074
SSON53G_RS22575	ilvD	dihydroxy-acid dehydratase	-0.860861	3.95915	3.41932e-05	0.000109861
SSON53G_RS08505	ydiI	acyl-CoA esterase	-0.728467	3.95841	3.42715e-05	0.000110051
SSON53G_RS22620	gppA	guanosine-5'-triphosphate,3'-diphosphate pyrophosphatase	-0.467146	3.95088	3.48905e-05	0.000111976
SSON53G_RS22205		phosphodiesterase	-0.660703	3.9482	3.51256e-05	0.000112667
SSON53G_RS03570	sdhB	succinate dehydrogenase iron-sulfur subunit	-0.499314	3.94069	3.57661e-05	0.000114634
SSON53G_RS14950	yfgJ	hypothetical protein	-0.625494	3.94069	3.57792e-05	0.000114634
SSON53G_RS12690	proV_1	ABC transporter ATP-binding protein	1.35311	3.93938	3.59068e-05	0.000114978
SSON53G_RS03065		hydrolase	0.855763	3.93741	3.60909e-05	0.000115503
SSON53G_RS02150	panE	2-dehydropantoate 2-reductase	-0.728184	3.92908	3.68098e-05	0.000117738
SSON53G_RS15615	yncE_1	enterotoxin	1.10817	3.92897	3.68403e-05	0.000117769
SSON53G_RS19765	yrdD	hypothetical protein	-0.420988	3.92842	3.69072e-05	0.000117917
SSON53G_RS23570		phage tail tape measure protein	-1.55241	3.928	3.69636e-05	0.000118031
SSON53G_RS09000	hipB	transcriptional regulator	2.18648	3.92706	3.70645e-05	0.000118287
SSON53G_RS03365	fldA	flavodoxin-1	-0.49289	3.91677	3.79744e-05	0.000121123
SSON53G_RS06465	tyrP	tyrosine transporter TyrP	0.699284	3.90934	3.86659e-05	0.000123213
SSON53G_RS27565		IS91 family transposase	-0.980626	3.90934	3.86729e-05	0.000123213
SSON53G_RS21040		hypothetical protein	-0.994347	3.89059	4.04018e-05	0.00012865
SSON53G_RS13095	ccmC	heme exporter protein C	-1.45081	3.88759	4.07048e-05	0.000129542
SSON53G_RS29045		transposase	3.12961	3.88727	4.07576e-05	0.000129638
SSON53G_RS03235	corC	magnesium and cobalt efflux protein CorC	0.445182	3.88706	4.08001e-05	0.000129701
SSON53G_RS07405		DUF488 domain-containing protein	-0.992294	3.87634	4.18431e-05	0.000132942
SSON53G_RS07370	leuE	leucine efflux protein	0.684319	3.87233	4.22543e-05	0.000134174
SSON53G_RS28720	hypothetical protein	hypothetical protein	1.20642	3.86843	4.26592e-05	0.000135384
SSON53G_RS18985	garL	5-keto-4-deoxy-D-glucarate aldolase	1.25831	3.84708	4.48334e-05	0.000142205
SSON53G_RS21095		tRNA uridine-5-carboxymethylaminomethyl(34) synthesis GTPase MnmE	-0.672202	3.82588	4.71034e-05	0.000149322
SSON53G_RS10865	pyrF	orotidine-5'-phosphate decarboxylase	0.783323	3.82205	4.75471e-05	0.000150645
SSON53G_RS24990	kamA	EF-P beta-lysylation protein EpmB	0.571984	3.81651	4.81836e-05	0.000152577
SSON53G_RS04325	glnH	amino acid ABC transporter substrate-binding protein	-0.638852	3.81482	4.83982e-05	0.000153172
SSON53G_RS14455		bile acid:sodium symporter	-0.659845	3.80449	4.95914e-05	0.000156861
SSON53G_RS21985		membrane protein	1.25103	3.77582	5.30046e-05	0.000167564
SSON53G_RS18005	hemN_2	YggW family oxidoreductase	-0.609898	3.77576	5.30413e-05	0.000167587
SSON53G_RS08910	manA	mannose-6-phosphate isomerase	-0.684081	3.77411	5.32731e-05	0.000168226
SSON53G_RS10470	smrA	DNA endonuclease SmrA	0.75065	3.77049	5.37483e-05	0.000169633
SSON53G_RS06995	yebG	DNA damage-inducible protein	-0.717728	3.76862	5.40107e-05	0.000170367
SSON53G_RS17695	ygfY	antitoxin CptB	-0.414661	3.74991	5.64194e-05	0.000177866
SSON53G_RS24625	phnP	phosphonate metabolism protein PhnP	1.00355	3.74887	5.6586e-05	0.000178293
SSON53G_RS23960		tRNA-Tyr	0.788419	3.74737	5.68122e-05	0.000178907
SSON53G_RS01420	yafQ	type II toxin-antitoxin system mRNA interferase toxin YafQ	0.667053	3.74437	5.72386e-05	0.00018015
SSON53G_RS23620		DUF1454 domain-containing protein	-0.939639	3.74267	5.74947e-05	0.000180856
SSON53G_RS10445	ttcA	tRNA 2-thiocytidine(32) synthetase TtcA	0.516037	3.73989	5.78949e-05	0.000182015
SSON53G_RS12180	yoeB	Txe/YoeB family addiction module toxin	-1.35506	3.71687	6.10803e-05	0.000191923
SSON53G_RS04520	hypothetical protein	hypothetical protein	-1.22783	3.71176	6.18371e-05	0.000194194
SSON53G_RS04770	cydD	thiol reductant ABC exporter subunit CydD	-0.61506	3.70799	6.24108e-05	0.000195888
SSON53G_RS08715		FUSC family protein	1.10593	3.70452	6.29468e-05	0.000197462
SSON53G_RS04635	ybjP	lipoprotein	0.538573	3.68256	6.6247e-05	0.0002077
SSON53G_RS05615	csgA	major curlin subunit CsgA	1.98353	3.6822	6.63382e-05	0.000207872
SSON53G_RS11990	gltC	LysR family transcriptional regulator	0.716225	3.68165	6.64601e-05	0.000208139
SSON53G_RS26485		AAA family ATPase	1.36155	3.68044	6.66818e-05	0.000208719
SSON53G_RS17675	dsbC	bifunctional protein-disulfide isomerase/oxidoreductase DsbC	-0.525398	3.67826	6.7054e-05	0.000209769
SSON53G_RS33190		IS3 family transposase	-0.664583	3.67622	6.74381e-05	0.000210754
SSON53G_RS00505	murD	UDP-N-acetylmuramoyl-L-alanine--D-glutamate ligase	-0.518612	3.67622	6.74428e-05	0.000210754
SSON53G_RS09625	nhoA	N-hydroxyarylamine O-acetyltransferase	1.52368	3.67555	6.75839e-05	0.000211079
SSON53G_RS15010		enhanced serine sensitivity protein SseB	0.6664	3.67274	6.80603e-05	0.000212451
SSON53G_RS19130	nlpI	lipoprotein NlpI	-0.243949	3.66608	6.91495e-05	0.000215733
SSON53G_RS24860	cadA	lysine decarboxylase	1.33998	3.65676	7.06888e-05	0.000220414
SSON53G_RS02540	fetB	iron export permease FetB	-0.97147	3.64431	7.27843e-05	0.000226825
SSON53G_RS19920	rpsC	30S ribosomal protein S3	-0.623587	3.64199	7.32135e-05	0.000228037
SSON53G_RS32005		glycosyl transferase	1.55838	3.63608	7.42585e-05	0.000231166
SSON53G_RS24820	yjdG	two-component system response regulator DcuR	-0.695085	3.63601	7.43107e-05	0.000231202
SSON53G_RS11400	tdk	thymidine kinase	0.925936	3.63462	7.45886e-05	0.000231941
SSON53G_RS05645	clsC	phospholipase D family protein	0.600101	3.62913	7.55792e-05	0.000234893
SSON53G_RS17865		transporter	-1.4702	3.62308	7.66814e-05	0.000238188
SSON53G_RS22125		type I toxin-antitoxin system toxin Ldr family protein	-2.5282	3.62274	7.67825e-05	0.000238373
SSON53G_RS31970	hypothetical protein	hypothetical protein	1.88875	3.61815	7.76413e-05	0.000240908
SSON53G_RS22260		IS4 family transposase	-1.09161	3.61743	7.7812e-05	0.000241306
SSON53G_RS31800		serine/threonine protein phosphatase	1.74488	3.61237	7.87674e-05	0.000244136
SSON53G_RS20050	kefB	glutathione-regulated potassium-efflux system protein KefB	-0.625779	3.61095	7.90677e-05	0.000244934
SSON53G_RS18830	cfaB	fimbrial protein	-1.47417	3.60896	7.94748e-05	0.000246061
SSON53G_RS30610		hypothetical protein	-0.665846	3.60663	7.99443e-05	0.00024738
SSON53G_RS28340	hypothetical protein	hypothetical protein	2.09383	3.60589	8.01245e-05	0.000247804
SSON53G_RS19950	rplC	50S ribosomal protein L3	-0.454019	3.57974	8.51446e-05	0.000263187
SSON53G_RS07225		DUF2527 domain-containing protein	0.381472	3.57606	8.59149e-05	0.000265424
SSON53G_RS23675	hslU	HslU--HslV peptidase ATPase subunit	0.534992	3.56976	8.72171e-05	0.000269301
SSON53G_RS19755	aroE	shikimate dehydrogenase	-1.0015	3.56771	8.76947e-05	0.000270575
SSON53G_RS27170		hypothetical protein	-0.634114	3.56771	8.77247e-05	0.000270575
SSON53G_RS21260	yidG	hypothetical protein	-0.759034	3.55858	8.96379e-05	0.000276327
SSON53G_RS13750	fabB	3-oxoacyl-ACP synthase	-0.459248	3.55714	8.99833e-05	0.000277242
SSON53G_RS21510		IS21 family transposase	1.19049	3.55499	9.04788e-05	0.000278618
SSON53G_RS00905	btuF	cobalamin-binding protein	-0.763259	3.55266	9.10143e-05	0.000280116
SSON53G_RS22130		type I toxin-antitoxin system toxin Ldr family protein	-2.2527	3.54606	9.24585e-05	0.000284407
SSON53G_RS19270	murA	UDP-N-acetylglucosamine 1-carboxyvinyltransferase	-0.45016	3.54163	9.34559e-05	0.00028732
SSON53G_RS04745	clpA	ATP-dependent Clp protease ATP-binding subunit ClpA	0.508816	3.53925	9.40206e-05	0.000288901
SSON53G_RS02500		addiction module antidote protein, HigA family	-0.481226	3.53425	9.51603e-05	0.000292245
SSON53G_RS17005	ygcP	glycerol-3-phosphate responsive antiterminator	-1.30674	3.52538	9.71762e-05	0.000298276
SSON53G_RS23260	fdoI	formate dehydrogenase cytochrome b556(fdo) subunit	-0.676882	3.52381	9.75822e-05	0.000299361
SSON53G_RS09735	fecA	TonB-dependent siderophore receptor	0.542026	3.50974	0.000100848	0.000309212
SSON53G_RS11375	oppB	oligopeptide ABC transporter permease OppB	0.942631	3.50743	0.00010144	0.000310862
SSON53G_RS19285		phospholipid-binding protein MlaC	-0.493772	3.49592	0.000104221	0.000319213
SSON53G_RS19975		peptidoglycan-binding protein	1.38092	3.49589	0.000104284	0.000319235
SSON53G_RS16410	csiR	transcriptional regulator	1.05143	3.48162	0.000107825	0.000329895
SSON53G_RS03355		Fur leader peptide	0.70554	3.47303	0.000110037	0.000336485
SSON53G_RS19230	greA	transcription elongation factor GreA	-0.558826	3.47072	0.000110684	0.00033828
SSON53G_RS19745	yrdA	gamma carbonic anhydrase family protein	-0.485114	3.45545	0.000114708	0.000350392
SSON53G_RS00850		ATP-dependent helicase HrpB	-0.540997	3.44847	0.000116629	0.000356069
SSON53G_RS16165		IS21 family transposase	0.924789	3.44705	0.000117073	0.000357231
SSON53G_RS32430	hypothetical protein	hypothetical protein	1.23965	3.44686	0.000117186	0.000357386
SSON53G_RS33165		IS3 family transposase	-0.848927	3.44442	0.000117911	0.000359405
SSON53G_RS20855	yhiR	23S rRNA (adenine(2030)-N(6))-methyltransferase RlmJ	-0.696753	3.44114	0.000118867	0.000362125
SSON53G_RS10810		DUF559 domain-containing protein	1.53951	3.43922	0.000119458	0.00036373
SSON53G_RS06410	yecC	L-cystine ABC transporter ATP-binding protein YecC	0.580597	3.43518	0.000120639	0.000367131
SSON53G_RS18700		IS4 family transposase	-1.15802	3.43084	0.000121916	0.000370821
SSON53G_RS20515	glgB	glycogen-branching enzyme	0.432428	3.42856	0.000122623	0.000372771
SSON53G_RS05785		dihydroorotase	0.498864	3.41874	0.000125494	0.000381295
SSON53G_RS16105	ppnK	NAD(+) kinase	-0.632574	3.41865	0.000125585	0.00038137
SSON53G_RS05175	sulA	cell division inhibitor SulA	0.457222	3.41688	0.000126166	0.00038293
SSON53G_RS18410	parC	DNA topoisomerase IV subunit A	-0.466841	3.41489	0.000126813	0.000384689
SSON53G_RS03340		outer membrane porin, OprD family	-1.20286	3.41109	0.000127996	0.000388072
SSON53G_RS11535	sirB2	protein sirB2	0.958002	3.40943	0.000128554	0.000389554
SSON53G_RS20685	rsmD	ribosomal RNA small subunit methyltransferase D	-0.758106	3.39782	0.000132108	0.000400111
SSON53G_RS30135		hypothetical protein	0.742849	3.39727	0.000132344	0.000400616
SSON53G_RS11870	yedW	DNA-binding response regulator	0.711382	3.39634	0.00013275	0.000401479
SSON53G_RS32755		DUF4976 domain-containing protein	-1.27953	3.39634	0.00013277	0.000401479
SSON53G_RS23940	birA	bifunctional biotin--[acetyl-CoA-carboxylase] ligase/biotin operon repressor BirA	-0.743571	3.39502	0.000133243	0.000402696
SSON53G_RS01170	dmlR	LysR family transcriptional regulator	-0.842707	3.39421	0.000133564	0.000403451
SSON53G_RS20235	dam	adenine-specific DNA-methyltransferase	-0.494709	3.39219	0.000134257	0.000405331
SSON53G_RS26475		group II intron reverse transcriptase/maturase	0.638129	3.39115	0.000134651	0.000406304
SSON53G_RS21640	pyrE	orotate phosphoribosyltransferase	-1.06523	3.39012	0.000135042	0.000407268
SSON53G_RS04370	ybiS	transpeptidase	0.488549	3.38473	0.000136801	0.000412355
SSON53G_RS18405	plsC	1-acyl-sn-glycerol-3-phosphate acyltransferase	-0.650542	3.37161	0.00014107	0.000425
SSON53G_RS15740		IS91 family transposase	-0.99896	3.36921	0.000141927	0.000427354
SSON53G_RS05660	hypothetical protein	hypothetical protein	1.95058	3.36903	0.00014206	0.000427529
SSON53G_RS00450	ilvH	acetolactate synthase small subunit	1.18733	3.36808	0.000142447	0.000428468
SSON53G_RS24805	fumB	fumarate hydratase class I, anaerobic	-1.29739	3.36695	0.000142894	0.000429586
SSON53G_RS04050	ybhC	acyl-CoA thioesterase	0.495222	3.36587	0.000143324	0.000430651
SSON53G_RS26910	mxiM	lipoprotein MxiM	-1.76344	3.35504	0.000147024	0.000441531
SSON53G_RS16120		inner membrane protein YpjD	0.426364	3.35504	0.0001471	0.000441531
SSON53G_RS29425	hypothetical protein	hypothetical protein	3.24637	3.35205	0.000148194	0.000444581
SSON53G_RS08015		fructosamine kinase family protein	0.606187	3.35024	0.000148891	0.000446438
SSON53G_RS25310	fklB	FKBP-type peptidyl-prolyl cis-trans isomerase	-0.528949	3.34762	0.000149869	0.000449134
SSON53G_RS14545	yfeT	MurR/RpiR family transcriptional regulator	-1.04061	3.34677	0.000150241	0.000450014
SSON53G_RS12975		Bcr/CflA family drug resistance efflux transporter	0.513317	3.34493	0.000150959	0.000451926
SSON53G_RS20380	gntX	protein GntX	0.607059	3.34379	0.0001515	0.000453115
SSON53G_RS27630		hypothetical protein	-0.908867	3.34379	0.000151515	0.000453115
SSON53G_RS17130	gudD	glucarate dehydratase	1.13003	3.34038	0.00015279	0.000456687
SSON53G_RS27530	wbgX	DegT/DnrJ/EryC1/StrS family aminotransferase	-0.36976	3.33792	0.000153739	0.000459284
SSON53G_RS09350	mdtI	spermidine export protein MdtI	1.2391	3.32712	0.000157691	0.000470844
SSON53G_RS03715		AAA family ATPase	1.2164	3.32359	0.000159063	0.000474691
SSON53G_RS05595	csgD	transcriptional regulator CsgD	2.39746	3.31758	0.000161423	0.000481308
SSON53G_RS25500	yjgH	hypothetical protein	1.02961	3.31758	0.000161449	0.000481308
SSON53G_RS21915		glutathione S-transferase	0.428773	3.31279	0.000163324	0.000486645
SSON53G_RS22725		tRNA-Leu	0.618865	3.312	0.000163736	0.000487531
SSON53G_RS14430		tRNA-Val	0.802553	3.312	0.000163793	0.000487531
SSON53G_RS30670		transcriptional regulator	-1.47977	3.30598	0.000166164	0.000494333
SSON53G_RS05445		pyrimidine utilization transport protein G	0.955812	3.30565	0.000166379	0.000494712
SSON53G_RS12820		hypothetical protein	0.989983	3.3029	0.000167524	0.000497857
SSON53G_RS17960	yggJ	16S rRNA methyltransferase	-0.722855	3.29228	0.000171758	0.000510174
SSON53G_RS04665		NAD(P)-dependent oxidoreductase	0.676094	3.28901	0.000173148	0.000514036
SSON53G_RS02335	tesB	acyl-CoA thioesterase II	0.488694	3.28712	0.000173992	0.000516272
SSON53G_RS06540	flhD	flagellar transcriptional activator FlhD	1.7324	3.28511	0.00017489	0.000518667
SSON53G_RS03695		tRNA-Lys	1.13814	3.27048	0.000180976	0.000536438
SSON53G_RS18150		DNA helicase	-0.418866	3.26301	0.000184213	0.00054575
SSON53G_RS19740		16S ribosomal RNA	1.14782	3.25087	0.000189532	0.000561216
SSON53G_RS09050	glsA_2	glutaminase 2	-0.552137	3.24796	0.000190903	0.000564983
SSON53G_RS05650	mdoC	glucan biosynthesis protein C	0.66284	3.24682	0.000191506	0.000566473
SSON53G_RS21525		hypothetical protein	-0.881829	3.24589	0.000192016	0.000567686
SSON53G_RS18755	higA_2	transcriptional regulator	-1.24952	3.24288	0.000193551	0.000571643
SSON53G_RS17970	yqgE	YqgE/AlgH family protein	0.506088	3.24288	0.000193555	0.000571643
SSON53G_RS01065	tilS	tRNA(Ile)-lysidine synthetase	0.60133	3.23594	0.000196771	0.000580841
SSON53G_RS00400	sgrT	glucose uptake inhibitor SgrT	-1.00595	3.23286	0.000198273	0.000584972
SSON53G_RS07810		DUF1266 domain-containing protein	1.1653	3.22928	0.000200019	0.000589819
SSON53G_RS24765	melA	alpha-glucosidase/alpha-galactosidase	-0.590297	3.22789	0.000200822	0.000591708
SSON53G_RS22535		AAA family ATPase	1.05449	3.22789	0.000200867	0.000591708
SSON53G_RS21700		lipopolysaccharide core heptosyltransferase RfaQ	0.50934	3.22345	0.000203038	0.000597793
SSON53G_RS27460		IS91 family transposase	-0.785043	3.21912	0.000205178	0.000603783
SSON53G_RS01945	yaiI	YaiI/YqxD family protein	-0.582761	3.21832	0.000205661	0.00060489
SSON53G_RS08155	pinB	recombinase family protein	1.3311	3.21746	0.000206176	0.000606094
SSON53G_RS13515	nuoL	NADH-quinone oxidoreductase subunit L	-0.502248	3.21236	0.000208721	0.000613258
SSON53G_RS10755	puuR	transcriptional regulator	0.847914	3.20702	0.000211412	0.000620845
SSON53G_RS22565	ilvM	acetolactate synthase isozyme 2 small subunit	-1.85738	3.2067	0.000211674	0.000621296
SSON53G_RS23850	yijP	phosphoethanolamine transferase CptA	-0.441022	3.20118	0.000214492	0.000629243
SSON53G_RS06680		DUF72 domain-containing protein	0.828853	3.19612	0.000217117	0.000636617
SSON53G_RS00910	mtnN	5'-methylthioadenosine/S-adenosylhomocysteine nucleosidase	-0.393263	3.19553	0.000217523	0.000637479
SSON53G_RS03515	nei	endonuclease VIII	-0.874333	3.19375	0.000218532	0.000640107
SSON53G_RS06750	iraM	anti-adapter protein IraM	0.624492	3.19248	0.000219285	0.000641982
SSON53G_RS05800	mdtH	MFS transporter	0.59844	3.19025	0.000220525	0.00064528
SSON53G_RS03460		type IV secretion protein Rhs	0.684274	3.18747	0.000222058	0.000649433
SSON53G_RS00235	caiC	ATP-dependent acyl-CoA ligase	-1.30483	3.18065	0.000225685	0.000659702
SSON53G_RS04365	ybiR	anion transporter	0.645777	3.17681	0.000227822	0.000665568
SSON53G_RS08730	slyA	SlyA family transcriptional regulator	0.458948	3.17681	0.000227925	0.000665568
SSON53G_RS03370		LexA-regulated protein, CopB family	0.821632	3.1658	0.000233897	0.000682657
SSON53G_RS16305		antitermination protein	1.12646	3.16102	0.000236603	0.000690202
SSON53G_RS14705		oxidoreductase FeS-binding subunit	-0.964879	3.15789	0.000238441	0.000695208
SSON53G_RS27345	vapC	tRNA(fMet)-specific endonuclease VapC	-0.653529	3.15508	0.000240108	0.00069971
SSON53G_RS03585	sucB	dihydrolipoyllysine-residue succinyltransferase component of 2-oxoglutarate dehydrogenase complex	0.430128	3.15424	0.000240697	0.000701069
SSON53G_RS12845	cysL	LysR family transcriptional regulator	-0.529047	3.15236	0.000241867	0.000704117
SSON53G_RS02490	ybaK	Cys-tRNA(Pro) deacylase	-0.992907	3.1515	0.000242466	0.000705503
SSON53G_RS00485	ftsI	peptidoglycan glycosyltransferase FtsI	-0.427124	3.14922	0.000243869	0.000709223
SSON53G_RS16470	nrdH	NrdH-redoxin	2.64619	3.14295	0.000247538	0.000719524
SSON53G_RS04755	infA	translation initiation factor IF-1	0.585265	3.13749	0.0002508	0.000728637
SSON53G_RS05700	pinR_2	recombinase family protein	-0.778395	3.13678	0.000251404	0.000729828
SSON53G_RS23720		AAA family ATPase	1.31503	3.13678	0.000251466	0.000729828
SSON53G_RS23810	ptsA	phosphoenolpyruvate--protein phosphotransferase	-2.02239	3.13554	0.000252312	0.000731911
SSON53G_RS04255	ybiB	DNA-binding protein YbiB	-0.615842	3.1329	0.00025398	0.000736373
SSON53G_RS14880	uraA	uracil/xanthine transporter	0.66222	3.13159	0.000254877	0.000738598
SSON53G_RS22360	lpfA	fimbrial protein	-2.26523	3.12864	0.000256743	0.00074363
SSON53G_RS19305	yrbG	hypothetical protein	-0.50203	3.12734	0.000257649	0.000745873
SSON53G_RS02005	sbcC	exonuclease subunit SbcC	-0.603349	3.12123	0.000261429	0.000756433
SSON53G_RS25640		tRNA-Leu	0.609159	3.12027	0.000262139	0.000758102
SSON53G_RS21590	recG	DNA helicase RecG	-0.496416	3.11999	0.000262444	0.000758602
SSON53G_RS31360		phosphohydrolase	2.06693	3.10988	0.00026876	0.000776464
SSON53G_RS00840	sfsA	DNA/RNA nuclease SfsA	0.454403	3.10933	0.000269237	0.000777448
SSON53G_RS12755	yohK	CidB/LrgB family autolysis modulator	-0.748291	3.10838	0.00026996	0.00077914
SSON53G_RS24175	pNaS	Na/Pi cotransporter family protein	-0.526038	3.09582	0.000278027	0.000802016
SSON53G_RS10460	zntB	zinc transporter ZntB	0.758814	3.088	0.00028322	0.000816583
SSON53G_RS08670	grxD	monothiol glutaredoxin, Grx4 family	-0.407315	3.08451	0.000285649	0.000823171
SSON53G_RS01075	yaeP	hypothetical protein	-0.557187	3.07849	0.00028978	0.000834653
SSON53G_RS14680	maeB	NADP-dependent oxaloacetate-decarboxylating malate dehydrogenase	0.532778	3.07269	0.000293827	0.000845885
SSON53G_RS05420	agp	bifunctional glucose-1-phosphatase/inositol phosphatase	0.359239	3.07196	0.000294471	0.000847308
SSON53G_RS31455		type I secretion protein	0.900904	3.06874	0.000296811	0.000853611
SSON53G_RS21865	mtlD	mannitol-1-phosphate 5-dehydrogenase	0.652588	3.05086	0.000309438	0.000889479
SSON53G_RS22690	wzxE	lipid III flippase WzxE	-0.568055	3.04938	0.000310706	0.000892529
SSON53G_RS09075	marC	stress protection protein MarC	0.548302	3.04938	0.000310812	0.000892529
SSON53G_RS25710		IS1 family transposase	-0.740474	3.04625	0.000313213	0.000898971
SSON53G_RS23645	glpX	fructose 1,6-bisphosphatase	-0.597757	3.0439	0.000315074	0.000903858
SSON53G_RS06675	yecN	hypothetical protein	0.45441	3.03639	0.000320735	0.000919633
SSON53G_RS08750	pdxH	pyridoxine/pyridoxamine 5'-phosphate oxidase	-0.652054	3.0351	0.00032185	0.000922367
SSON53G_RS04105		invasion plasmid antigen	0.599095	3.03176	0.000324512	0.000929473
SSON53G_RS09940	mdoD	glucan biosynthesis protein D	0.393639	3.03176	0.000324656	0.000929473
SSON53G_RS07880	ydjZ_2	TVP38/TMEM64 family protein	-1.77902	3.02604	0.000329126	0.000941798
SSON53G_RS11185		tRNA-Met	1.26421	3.02447	0.000330484	0.000945211
SSON53G_RS26695		invasion plasmid antigen	-1.13225	3.02298	0.000331784	0.000948454
SSON53G_RS12030	glpF_1	propanediol diffusion facilitator PduF	1.2439	3.01888	0.000335102	0.000957458
SSON53G_RS22910	metR	transcriptional regulator	0.803377	3.01739	0.000336424	0.000960755
SSON53G_RS03105		D-alanyl-D-alanine carboxypeptidase	0.372466	3.01586	0.000337778	0.000964139
SSON53G_RS11565	prs	ribose-phosphate pyrophosphokinase	-0.390211	3.01108	0.00034169	0.000974816
[truncated: 3,704 more rows]

## Sheet: Biological processes S. sonnei
Functional Category	pvalue	Enrichment FDR	Genes in list	Total genes	% Pathway	Upregulated genes	Downregulated genes	%Up	%Down
oxidoreductase activity, acting on other nitrogenous compounds as donors	0.00115607	0.0434238	11	18	61.1111	3	8	16.6667	44.4444
alpha-amino acid catabolic process	0.00105932	0.0434238	21	42	50	8	13	19.0476	30.9524
organic acid catabolic process	0.00100806	0.0434238	43	103	41.7476	20	23	19.4175	22.3301
carboxylic acid catabolic process	0.00100806	0.0434238	43	103	41.7476	20	23	19.4175	22.3301
response to stress	0.000999001	0.0434238	142	431	32.9466	84	58	19.4896	13.4571
cellular amino acid catabolic process	0.00105932	0.0434238	22	46	47.8261	9	13	19.5652	28.2609
alpha-amino acid metabolic process	0.00100301	0.0434238	59	151	39.0728	30	29	19.8675	19.2053
cation homeostasis	0.00111607	0.0434238	13	35	37.1429	10	3	28.5714	8.57143
cellular ion homeostasis	0.00111607	0.0434238	13	33	39.3939	10	3	30.303	9.09091
cellular cation homeostasis	0.00113895	0.0434238	12	32	37.5	10	2	31.25	6.25
glutamine family amino acid metabolic process	0.00105932	0.0434238	21	41	51.2195	14	7	34.1463	17.0732
glutamine family amino acid biosynthetic process	0.00113895	0.0434238	12	23	52.1739	11	1	47.8261	4.34783
arginine metabolic process	0.00111607	0.0434238	13	21	61.9048	11	2	52.381	9.52381
lipid catabolic process	0.00125313	0.0434238	7	13	53.8462	7	0	53.8462	0
cellular lipid catabolic process	0.00125313	0.0434238	7	13	53.8462	7	0	53.8462	0
response to pH	0.00109649	0.0434238	15	22	68.1818	12	3	54.5455	13.6364
response to acidic pH	0.00115607	0.0434238	11	16	68.75	9	2	56.25	12.5
fatty acid catabolic process	0.00125313	0.0434238	7	12	58.3333	7	0	58.3333	0
lipid modification	0.00117647	0.0434238	10	15	66.6667	9	1	60	6.66667
fatty acid oxidation	0.00125313	0.0434238	7	11	63.6364	7	0	63.6364	0
lipid oxidation	0.00125313	0.0434238	7	11	63.6364	7	0	63.6364	0
response to iron ion	0.00117647	0.0434238	10	13	76.9231	9	1	69.2308	7.69231
fatty acid beta-oxidation	0.00125313	0.0434238	7	10	70	7	0	70	0

## Sheet: Biological processes gene lists
Functional Category	Genes
Response to stress	SSON53G_RS20350 SSON53G_RS05525 SSON53G_RS02880 SSON53G_RS20345 SSON53G_RS16905 SSON53G_RS25040 SSON53G_RS23680 SSON53G_RS23640 SSON53G_RS05280 SSON53G_RS00070 SSON53G_RS05430 SSON53G_RS24100 SSON53G_RS16490 SSON53G_RS12790 SSON53G_RS05030 SSON53G_RS20500 SSON53G_RS22400 SSON53G_RS23120 SSON53G_RS17190 SSON53G_RS00425 SSON53G_RS06525 SSON53G_RS17350 SSON53G_RS23350 SSON53G_RS08660 SSON53G_RS08710…
Alpha-amino acid metabolic process	SSON53G_RS21925 SSON53G_RS19185 SSON53G_RS25540 SSON53G_RS14475 SSON53G_RS22915 SSON53G_RS16905 SSON53G_RS24135 SSON53G_RS13455 SSON53G_RS20105 SSON53G_RS22590 SSON53G_RS15190 SSON53G_RS05500 SSON53G_RS16395 SSON53G_RS24750 SSON53G_RS01055 SSON53G_RS24860 SSON53G_RS24420 SSON53G_RS06320 SSON53G_RS00425 SSON53G_RS00445 SSON53G_RS04800 SSON53G_RS16400 SSON53G_RS17735 SSON53G_RS15160 SSON53G_RS09055…
Organic acid catabolic process	SSON53G_RS04680 SSON53G_RS14270 SSON53G_RS05500 SSON53G_RS16395 SSON53G_RS24750 SSON53G_RS01055 SSON53G_RS24860 SSON53G_RS18750 SSON53G_RS17130 SSON53G_RS16400 SSON53G_RS17735 SSON53G_RS15160 SSON53G_RS09055 SSON53G_RS17730 SSON53G_RS23015 SSON53G_RS13835 SSON53G_RS18945 SSON53G_RS17185 SSON53G_RS23010 SSON53G_RS17445 SSON53G_RS20100 SSON53G_RS07890 SSON53G_RS01400 SSON53G_RS18065 SSON53G_RS02510…
Carboxylic acid catabolic process	SSON53G_RS04680 SSON53G_RS14270 SSON53G_RS05500 SSON53G_RS16395 SSON53G_RS24750 SSON53G_RS01055 SSON53G_RS24860 SSON53G_RS18750 SSON53G_RS17130 SSON53G_RS16400 SSON53G_RS17735 SSON53G_RS15160 SSON53G_RS09055 SSON53G_RS17730 SSON53G_RS23015 SSON53G_RS13835 SSON53G_RS18945 SSON53G_RS17185 SSON53G_RS23010 SSON53G_RS17445 SSON53G_RS20100 SSON53G_RS07890 SSON53G_RS01400 SSON53G_RS18065 SSON53G_RS02510…
Glutamine family amino acid metabolic process	SSON53G_RS19185 SSON53G_RS25540 SSON53G_RS15190 SSON53G_RS05500 SSON53G_RS16395 SSON53G_RS24750 SSON53G_RS01055 SSON53G_RS16400 SSON53G_RS09055 SSON53G_RS23865 SSON53G_RS17290 SSON53G_RS23870 SSON53G_RS20100 SSON53G_RS07890 SSON53G_RS13695 SSON53G_RS23875 SSON53G_RS18065 SSON53G_RS19390 SSON53G_RS23155 SSON53G_RS02510 SSON53G_RS07905
Cellular amino acid catabolic process	SSON53G_RS05500 SSON53G_RS16395 SSON53G_RS24750 SSON53G_RS01055 SSON53G_RS24860 SSON53G_RS16400 SSON53G_RS17735 SSON53G_RS15160 SSON53G_RS09055 SSON53G_RS17730 SSON53G_RS18945 SSON53G_RS17185 SSON53G_RS20100 SSON53G_RS07890 SSON53G_RS18065 SSON53G_RS02510 SSON53G_RS21765 SSON53G_RS13620 SSON53G_RS15870 SSON53G_RS06315 SSON53G_RS18935 SSON53G_RS07905
Alpha-amino acid catabolic process	SSON53G_RS05500 SSON53G_RS16395 SSON53G_RS24750 SSON53G_RS01055 SSON53G_RS24860 SSON53G_RS17735 SSON53G_RS15160 SSON53G_RS09055 SSON53G_RS17730 SSON53G_RS18945 SSON53G_RS17185 SSON53G_RS20100 SSON53G_RS07890 SSON53G_RS18065 SSON53G_RS02510 SSON53G_RS21765 SSON53G_RS13620 SSON53G_RS15870 SSON53G_RS06315 SSON53G_RS18935 SSON53G_RS07905
Response to pH	SSON53G_RS14270 SSON53G_RS22400 SSON53G_RS23350 SSON53G_RS11785 SSON53G_RS24150 SSON53G_RS11860 SSON53G_RS02510 SSON53G_RS19075 SSON53G_RS14275 SSON53G_RS20960 SSON53G_RS20965 SSON53G_RS02515 SSON53G_RS07210 SSON53G_RS20970 SSON53G_RS09420
Cellular ion homeostasis	SSON53G_RS12830 SSON53G_RS02835 SSON53G_RS24750 SSON53G_RS01055 SSON53G_RS22400 SSON53G_RS09470 SSON53G_RS04830 SSON53G_RS09465 SSON53G_RS15045 SSON53G_RS26030 SSON53G_RS20385 SSON53G_RS02535 SSON53G_RS04355
Cation homeostasis	SSON53G_RS12830 SSON53G_RS02835 SSON53G_RS24750 SSON53G_RS01055 SSON53G_RS09470 SSON53G_RS04830 SSON53G_RS09465 SSON53G_RS15045 SSON53G_RS26030 SSON53G_RS20385 SSON53G_RS02535 SSON53G_RS25685 SSON53G_RS04355
Arginine metabolic process	SSON53G_RS19185 SSON53G_RS25540 SSON53G_RS24750 SSON53G_RS01055 SSON53G_RS16400 SSON53G_RS09055 SSON53G_RS23865 SSON53G_RS17290 SSON53G_RS23870 SSON53G_RS20100 SSON53G_RS07890 SSON53G_RS23875 SSON53G_RS07905
Cellular cation homeostasis	SSON53G_RS12830 SSON53G_RS02835 SSON53G_RS24750 SSON53G_RS01055 SSON53G_RS09470 SSON53G_RS04830 SSON53G_RS09465 SSON53G_RS15045 SSON53G_RS26030 SSON53G_RS20385 SSON53G_RS02535 SSON53G_RS04355
Glutamine family amino acid biosynthetic process	SSON53G_RS19185 SSON53G_RS25540 SSON53G_RS16400 SSON53G_RS23865 SSON53G_RS17290 SSON53G_RS23870 SSON53G_RS20100 SSON53G_RS07890 SSON53G_RS23875 SSON53G_RS19390 SSON53G_RS23155 SSON53G_RS02510
Response to acidic pH	SSON53G_RS14270 SSON53G_RS23350 SSON53G_RS11785 SSON53G_RS24150 SSON53G_RS11860 SSON53G_RS02510 SSON53G_RS14275 SSON53G_RS20960 SSON53G_RS20965 SSON53G_RS07210 SSON53G_RS09420
Oxidoreductase activity, acting on other nitrogenous compounds as donors	SSON53G_RS05280 SSON53G_RS20130 SSON53G_RS04690 SSON53G_RS09615 SSON53G_RS13130 SSON53G_RS11460 SSON53G_RS09600 SSON53G_RS09605 SSON53G_RS24530 SSON53G_RS24535 SSON53G_RS20135
Response to iron ion	SSON53G_RS14385 SSON53G_RS13410 SSON53G_RS13415 SSON53G_RS13420 SSON53G_RS10130 SSON53G_RS10125 SSON53G_RS25685 SSON53G_RS10115 SSON53G_RS13405 SSON53G_RS10120
Lipid modification	SSON53G_RS18750 SSON53G_RS12425 SSON53G_RS23015 SSON53G_RS13835 SSON53G_RS23010 SSON53G_RS17445 SSON53G_RS01400 SSON53G_RS08630 SSON53G_RS02290 SSON53G_RS08550
Fatty acid beta-oxidation	SSON53G_RS18750 SSON53G_RS23015 SSON53G_RS13835 SSON53G_RS23010 SSON53G_RS17445 SSON53G_RS01400 SSON53G_RS02290
Fatty acid catabolic process	SSON53G_RS18750 SSON53G_RS23015 SSON53G_RS13835 SSON53G_RS23010 SSON53G_RS17445 SSON53G_RS01400 SSON53G_RS02290
Lipid catabolic process	SSON53G_RS18750 SSON53G_RS23015 SSON53G_RS13835 SSON53G_RS23010 SSON53G_RS17445 SSON53G_RS01400 SSON53G_RS02290
Fatty acid oxidation	SSON53G_RS18750 SSON53G_RS23015 SSON53G_RS13835 SSON53G_RS23010 SSON53G_RS17445 SSON53G_RS01400 SSON53G_RS02290
Lipid oxidation	SSON53G_RS18750 SSON53G_RS23015 SSON53G_RS13835 SSON53G_RS23010 SSON53G_RS17445 SSON53G_RS01400 SSON53G_RS02290
Cellular lipid catabolic process	SSON53G_RS18750 SSON53G_RS23015 SSON53G_RS13835 SSON53G_RS23010 SSON53G_RS17445 SSON53G_RS01400 SSON53G_RS02290
